# Supplementary material
Source: PubMed Central journal article supplement (PMC4190011)
Supplement: NIHMS619707-supplement-Supplemental_Material.pdf [file NIHMS619707-supplement-Supplemental_Material.pdf]

## Supplemental material for:

# Integrating Genetic, Transcriptional, and Functional Analyses to Identify Five Novel Genes for Atrial Fibrillation

Moritz F. Sinner, MD, MPH<sup>1,2</sup>, Nathan R. Tucker, PhD<sup>1,3</sup>, Kathryn L. Lunetta, PhD<sup>1,4,5</sup>, Kouichi Ozaki, PhD<sup>1,6</sup>, J. Gustav Smith, MD, PhD<sup>1,7,8</sup>, Stella Trompet, PhD<sup>1,9</sup>, Joshua C. Bis, PhD<sup>1,10,11</sup>, Honghuang Lin, PhD<sup>1,5,12</sup>, Mina K. Chung, MD<sup>1,13,14</sup>, Jonas B. Nielsen, MD<sup>1,15,16</sup>, Steven A. Lubitz, MD, MPH<sup>1,3,17</sup>, Bouwe P. Krijthe, PhD<sup>1,18,19</sup>, Jared W. Magnani, MD<sup>1,20</sup>, Jiangchuan Ye, MD, PhD<sup>3</sup>, Michael H. Gollob, MD<sup>21</sup>, Tatsuhiko Tsunoda, PhD<sup>22</sup>, Martina Müller-Nurasyid, PhD<sup>2,23,24</sup>, Peter Lichtner, PhD<sup>25</sup>, Annette Peters, PhD<sup>26,27</sup>, Elena Dolmatova, MD<sup>3</sup>, Michiaki Kubo, MD, PhD<sup>28</sup>, Jonathan D. Smith, PhD<sup>13,29</sup>, Bruce M. Psaty, MD, PhD<sup>10,11,30,31,32</sup>, Nicholas L. Smith, PhD<sup>10,30,31,33</sup>, J. Wouter Jukema, MD, PhD<sup>9,34</sup>, Daniel I. Chasman, PhD<sup>35,36</sup>, Christine M. Albert, MD, MPH<sup>35,36</sup>, Yusuke Ebana, MD, PhD<sup>37</sup>, Tetsushi Furukawa, MD, PhD<sup>37</sup>, Peter MacFarlane, DSc<sup>38</sup>, Tamara B. Harris, MD, MS<sup>39</sup>, Dawood Darbar, MD<sup>40</sup>, Marcus Dörr, MD<sup>41</sup>, Anders G. Holst, MD, PhD<sup>15,16</sup>, Jesper H. Svendsen, MD, DMSc<sup>15,16,42</sup>, Albert Hofman, MD, PhD<sup>18,19</sup>, Andre G. Uitterlinden, MD, PhD<sup>18,19,43</sup>, Vilmundur Gudnason, MD<sup>44,45</sup>, Mitsuaki Isobe, MD, PhD<sup>46</sup>, Rainer Malik, PhD<sup>47</sup>, Martin Dichgans, MD<sup>47,48</sup>, Jonathan Rosand, MD, MSc<sup>49,50,51</sup>, David R. Van Wagoner, PhD<sup>13,14</sup>, METASTROKE Consortium, AFGEn Consortium, Emelia J. Benjamin, MD, ScM<sup>5,20,52,53,61</sup>, David J. Milan, MD<sup>3,17,61</sup>, Olle Melander, MD, PhD<sup>54,61</sup>, Susan R. Heckbert, MD, PhD<sup>10,30,31,61</sup>, Ian Ford, PhD<sup>55,61</sup>, Yongmei Liu, MD, PhD<sup>56,61</sup>, John Barnard, PhD<sup>57,61</sup>, Morten S. Olesen, MSc, PhD<sup>15,16,61</sup>, Bruno H.C. Stricker, MB, PhD<sup>18,19,43,58,59,61</sup>, Toshihiro Tanaka, MD, PhD<sup>60,61</sup>, Stefan Käab, MD, PhD<sup>2,26,61</sup>, Patrick T. Ellinor, MD, PhD<sup>3,17,49,61</sup>

### Address for correspondence:

Stefan Käab, MD, PhD, Department of Medicine I, University Hospital Munich, Campus Innenstadt, Ludwig Maximilians University Munich, Ziemssenstr. 1, 80336 Munich, Germany. Phone: +49-89-5160-2295; Fax: +49-89-5160-2258; Email: skaab@med.lmu.de

Patrick T. Ellinor, MD, PhD, Cardiovascular Research Center, Massachusetts General Hospital, 149 13<sup>th</sup> Street, Charlestown, MA, USA. Phone: +1-617-724-8729; +1-617-726-5806; Email: ellinor@mgh.harvard.edu

### Affiliations

1. These authors contributed equally to this work.
2. Department of Medicine I, University Hospital Munich, Campus Grosshadern, Ludwig-Maximilians-University, Munich, Germany.
3. Cardiovascular Research Center, Massachusetts General Hospital, Charlestown, MA, USA
4. Department of Biostatistics, Boston University School of Public Health, Boston, MA, USA
5. National Heart, Lung and Blood Institute's and Boston University's Framingham Heart Study, Framingham, MA, USA
6. Laboratory for Cardiovascular Diseases, RIKEN Center for Integrative Medical Sciences, Yokohama, Japan

7. Program in Medical and Population Genetics, Broad Institute of Harvard and MIT, Cambridge, MA, USA
8. Department of Cardiology, Lund University, Lund, Sweden
9. Department of Cardiology, Leiden University Medical Center, Leiden, The Netherlands
10. Cardiovascular Health Research Unit, University of Washington, Seattle, WA, USA.
11. Department of Medicine, University of Washington, Seattle, WA, USA
12. Computational Biomedicine Section, Department of Medicine, Boston University School of Medicine, Boston, MA, USA
13. Department of Cardiovascular Medicine, Heart and Vascular Institute, Cleveland Clinic, Cleveland, OH, USA
14. Department of Molecular Cardiology, Lerner Research Institute, Cleveland Clinic, Cleveland, OH, USA
15. Danish National Research Foundation Centre for Cardiac Arrhythmia, Copenhagen, Denmark
16. Laboratory for Molecular Cardiology, The Heart Centre, Rigshospitalet, University of Copenhagen, Copenhagen, Denmark
17. Cardiac Arrhythmia Service, Massachusetts General Hospital, Boston, MA, USA
18. Department of Epidemiology, Erasmus Medical Center, Rotterdam, The Netherlands.
19. Netherlands Consortium for Healthy Aging (NCHA), Netherlands
20. Cardiology Section, Department of Medicine, Boston University School of Medicine, Boston, MA, USA.
21. Arrhythmia Research Laboratory, University of Ottawa Heart Institute, Ottawa, Ontario, Canada.
22. Laboratory for Medical Science Mathematics, RIKEN Center for Integrative Medical Sciences, Yokohama, Japan
23. Institute of Genetic Epidemiology, Helmholtz Zentrum München - German Research Center for Environmental Health, Neuherberg, Germany.
24. Institute of Medical Informatics, Biometry and Epidemiology, Ludwig-Maximilians-University, Munich, Germany.
25. Institute of Human Genetics, Helmholtz Zentrum München - German Research Center for Environmental Health, Neuherberg, Germany.
26. Deutsches Zentrum für Herz- Kreislaufforschung e.V. (DZHK), partner site Munich Heart Alliance, Munich, Germany
27. Institute of Epidemiology II, Helmholtz Zentrum München - German Research Center for Environmental Health, Neuherberg, Germany.
28. Laboratory for Genotyping Development, RIKEN Center for Integrative Medical Sciences, Yokohama, Japan
29. Department of Cellular & Molecular Medicine, Lerner Research Institute, Cleveland Clinic, Cleveland, OH, USA
30. Group Health Research Institute, Group Health Cooperative, Seattle, WA, USA
31. Department of Epidemiology, University of Washington, Seattle, WA, USA
32. Department of Health Services, University of Washington, Seattle, WA, USA
33. Epidemiologic Research and Information Center of the Department of Veterans Affairs Office of Research and Development, Seattle, WA, USA
34. Interuniversity Cardiology Institute of the Netherlands, Utrecht, The Netherlands
35. Harvard Medical School, Boston, MA, USA
36. Division of Preventive Medicine, Cardiovascular Division, Brigham and Women's Hospital, Boston, MA, USA
37. Department of Bio-Informational Pharmacology, Medical Research Institute, Tokyo Medical and Dental University, Tokyo, Japan
38. Institute of Cardiovascular and Medical Sciences, University of Glasgow, UK
39. Laboratory of Epidemiology, Demography, and Biometry, Intramural Research Program, National Institute on Aging, National Institutes of Health, Bethesda, MD, USA.

40. Department of Medicine, Vanderbilt University School of Medicine, Nashville, Tennessee, USA
41. Department of Internal Medicine B, Ernst Moritz Arndt University Greifswald, Greifswald, Germany
42. Department of Clinical Medicine, Faculty of Health Sciences, University of Copenhagen, Copenhagen, Denmark
43. Department of Internal Medicine, Erasmus Medical Center, Rotterdam, The Netherlands
44. Icelandic Heart Association Research Institute, Kopavogur, Iceland
45. University of Iceland, Reykjavik, Iceland
46. Department of Cardiovascular Medicine, Tokyo Medical and Dental University, Japan
47. Institute for Stroke and Dementia Research, University Hospital Munich, Ludwig-Maximilians-University, Munich, Germany
48. Munich Cluster for Systems Neurology (SyNergy), Munich, Germany
49. Center for Human Genetic Research, Massachusetts General Hospital, Boston, MA, USA.
50. Department of Neurology, Massachusetts General Hospital, Boston, MA, USA
51. Program in Medical and Population Genetics, Broad Institute of Harvard and MIT, Cambridge, MA, USA
52. Department of Epidemiology, Boston University School of Public Health, Boston, MA, USA.
53. Preventive Medicine Section, Department of Medicine, Boston University School of Medicine, Boston, MA, USA.
54. Department of Clinical Sciences, Lund University, Malmö, Sweden.
55. Robertson Centre for Biostatistics, University of Glasgow, Glasgow, UK
56. Department of Epidemiology & Prevention, Public Health Sciences, Wake Forest School of Medicine, Winston Salem, NC, USA.
57. Department of Quantitative Health Sciences, Lerner Research Institute, Cleveland Clinic, Cleveland, OH, USA.
58. Inspectorate for Health Care, the Hague, The Netherlands
59. Department of Medical Informatics, Erasmus Medical Center, Rotterdam, The Netherlands
60. Department of Human Genetics and Disease Diversity, Graduate School of Medical and Dental Sciences, Tokyo Medical and Dental University, Tokyo, Japan
61. These authors jointly supervised this work.

## Table of Contents

|                                                                                                                                | Page |
|--------------------------------------------------------------------------------------------------------------------------------|------|
| Supplemental Methods                                                                                                           | 5    |
| Supplemental Table 1. Characteristics of the study cohorts                                                                     | 13   |
| Supplemental Table 2. <i>In-silico</i> replication genotyping information.                                                     | 14   |
| Supplemental Table 3. SNP replication results in Europeans, by cohort                                                          | 15   |
| Supplemental Table 4. Meta-analysis association results in Europeans                                                           | 17   |
| Supplemental Table 5. Six genome-wide significant AF loci in Japanese                                                          | 19   |
| Supplemental Table 6. Fine mapping of the <i>NEURL</i> locus in Japanese.                                                      | 20   |
| Supplemental Table 7. Comparison of AF association results between individuals of European and Japanese ancestry               | 21   |
| Supplemental Table 8. eQTL analyses using the Genotype-Tissue Expression Portal (GTEx) and Cleveland Clinic Atrial Tissue Bank | 22   |
| Supplemental Table 9. Nucleotide sequences used for morpholinos and PCR analyses, morpholino efficacy.                         | 31   |
| Supplemental Table 10. Atrial action potential durations following morpholino microinjection.                                  | 32   |
| Supplemental Figure 1. Regional plots for the associations with atrial fibrillation in the respective other ethnic group.      | 33   |
| Supplemental Figure 2. Protein interaction analyses in COS7 cells.                                                             | 34   |
| Supplemental Figure 3. Pathway analysis for 14 atrial fibrillation loci.                                                       | 35   |
| References                                                                                                                     | 36   |

## Supplemental methods

### *Study samples: Europeans*

Cohorts contributing to the discovery sample included the **Age, Gene / Environment Susceptibility (AGES)** study from Reykjavik, Iceland, the **German Competence Network on Atrial Fibrillation (AFNET)** with controls from the **Cooperative Health Research in the Region of Augsburg (KORA) S4** study, the **Atherosclerosis Risk in Communities (ARIC)** study, the **Cleveland Clinics Lone Atrial Fibrillation GeneBank Study (CC)**, the **Cardiovascular Health Study (CHS)**, the **Framingham Heart Study (FHS)**, the **Heart and Vascular Health (HVH)** Study, the **Massachusetts General Hospital (MGH)** and controls from the **MIGEN** study, the **Rotterdam Study I (RS-I)**, the **Study of Health in Pomerania (SHIP)**, the **Vanderbilt Lone Atrial Fibrillation Registry**, and the **Women's Genome Health Study (WGHS)**. Details describing the cohorts in the discovery sample can be found elsewhere.<sup>1</sup>

For the replication stage, we included cohorts providing *in-silico* data derived from prior genome-wide genotyping, and cohorts providing data from direct genotyping. The following cohorts contributed *in-silico* results:

The **Health Aging and Body Composition (Health ABC)** Study is an ongoing cohort study of factors contributing to incident disability and the decline in function of healthier older persons. A particular emphasis is on changes in body composition in senescence. The study is sponsored by the National Institute of Aging. Between April 1997 and June 1998, Health ABC enrolled well-functioning, community-dwelling black (n=1,281) and white (n=1,794) men and women age 70-79 years. Recruited from a random sample, participants were white and all black Medicare eligible residents in the Pittsburgh, PA, and Memphis, TN, metropolitan areas. All participants received a baseline exam, annual follow-up clinical exams, and phone contacts every 6 months to identify major health events and document functional status between clinic visits.

The **PROspective Study of Pravastatin in the Elderly at Risk (PROSPER)** study has been described elsewhere.<sup>2</sup> In brief, PROSPER is a prospective, multicenter, randomized, placebo-controlled trial to determine if treatment with pravastatin reduces the risk of major vascular events in elderly.<sup>3</sup> From December 1997 to May 1999, individuals were screened and enrolled in Glasgow (Scotland), Cork (Ireland), and Leiden (Netherlands). To be recruited, men and women had to be 70-82 years of age, had to have pre-existing vascular disease or had to be at increased risk of such disease because of smoking, hypertension, or diabetes. Overall, 5,804 participants were randomized to receive pravastatin or placebo. At enrollment, bio-samples were stored and measurement of cognitive function was performed. Upon completion of the clinical trial, stored DNA samples of 5,763 participants were genotyped using the Illumina 660K beadchip (PHASE substudy).<sup>4</sup>

The **Rotterdam Study II (RS-II)**, a community-based study of elderly individuals from a suburb of Rotterdam, focused on identifying determinants of health and cardiovascular, neurogeriatric, bone, and eye diseases.<sup>5</sup> The study started in 2000-2001. Participants  $\geq 55$  years of age were examined triennially and up to 3 times. Atrial fibrillation (AF) was diagnosed based on electrocardiograms at study visit, and upon review of hospital discharge information and general practitioner diagnoses. AF was verified by two physicians and disagreements settled by review of a cardiologist.

The following cohorts provided direct genotyping results:

We recruited AF cases from the **German Competence Network for Atrial Fibrillation (AFNET)** national registry.<sup>6</sup> Additional AF cases were recruited from the Department of Medicine I of the University Hospital Munich, Campus Großhadern of the Ludwig-Maximilians University Munich. We enriched for patients with AF onset before 60 years of age. The diagnosis of AF was made based on electrocardiograms analyzed by trained physicians. We excluded with moderate to severe heart failure, moderate to severe valve disease, or hyperthyroidism. Control individuals were enrolled in the **Cooperative Health Research in the Region of Augsburg (KORA) S4** study, which was conducted

between 1999 and 2001. All participants were 25-74 years old. Those with a history of AF, signs or symptoms of AF on physical examination, or AF on electrocardiograms, which all participants received, were excluded. Initially, 4261 participants were included, and 4073 had full data available for analysis.

From the **Danish Study of Genetic Causes of Atrial Fibrillation (DANFIB)**,<sup>7-9</sup> 396 consecutive patients with AF were included between 2003 and 2011. All enrolled individuals originate from the region of Copenhagen in Denmark. From the same area, a control cohort (n=750) free of AF was recruited. Additional cardiologic evaluation was performed to adjudicate concomitant cardiovascular conditions including, diabetes mellitus, myocardial infarction and heart failure. All enrolled participants provided written informed consent.

**The Heart and Vascular Health Study (HVH)** is a study of incident AF in the setting of Group Health Cooperative, a large integrated healthcare system in Washington State, USA. All plan members assigned a new ICD-9 code of 427.31 or 427.32 in the inpatient or outpatient setting between October 1<sup>st</sup>, 2001 and December 31<sup>st</sup>, 2004 were identified. Incident AF was verified by review of medical records with the requirement that the AF be documented by 12-lead electrocardiogram and clinically recognized by a physician, with no previous evidence of AF in the medical record. Control subjects were identified from the Group Health membership, and had no history of AF. Included in the HVH replication sample for this analysis were atrial fibrillation cases of  $\geq 66$  years of age or below age 66 but with clinically recognized structural heart disease at atrial fibrillation diagnosis, and referent subjects without atrial fibrillation, who were frequency matched to atrial fibrillation cases on the basis of age, sex, hypertension and year of identification.<sup>10</sup>

**The Malmö AF cohort (MAC)** consists of cases with prevalent or incident AF recruited from two large population-based cohorts in Malmö, Sweden (Malmö Diet and Cancer Study;<sup>11</sup> reexamination of the Malmö Preventive Project<sup>12</sup>). All AF cases were identified from national registers as previously described,<sup>11</sup> and then matched in a 1:1 fashion to controls from the same

cohort by sex, age ( $\pm 1$  year), and date of baseline exam ( $\pm 1$  year). Also, controls required a follow-up exceeding that of the corresponding AF case.

From the **Massachusetts General Hospital Atrial Fibrillation Study (MGH)** in Boston, MA, we enrolled additional AF cases that were not available for genome-wide genotyping. Enrollment took place at the hospital's arrhythmia service from 2001 to 2008, and individuals had to be  $\leq 65$  years of age at the AF diagnosis, and present without structural heart disease, hyperthyroidism, myocardial infarction, or heart failure. Control patients were also recruited from the **MIGEN** study, which was composed of healthy patients recruited at MGH, particularly free of AF and myocardial infarction.

The **Ottawa Heart AF study (Ottawa)** consists of patients with lone AF, or AF and hypertension, recruited from the Arrhythmia Clinic at the University of Ottawa Heart Institute (UOHI), Ottawa, Ontario, Canada. Enrollment required at least one episode of electrocardiographically documented AF characterized by erratic atrial activity without distinct P waves and irregular QRS intervals. Exclusion criteria consisted of a history of coronary artery disease, left ventricular ejection fraction  $< 50\%$ , or significant valvular disease on echocardiography. Control subjects were drawn from the control arm of the Ottawa Heart Genomics Study (OHGS), an ongoing case control study for coronary artery disease at the UOHI. Male control participants were  $\geq 65$  years, while female controls were  $\geq 70$  years of age. Controls with a documented history of AF were excluded from this study. All cases and controls were of Western European ancestry and provided written informed consent under a protocol approved by the Human Research Ethics Board at UOHI.

#### *Study samples: Japanese*

Japanese samples examined in this study had been investigated earlier.<sup>1</sup> In brief, all AF cases and AF-free controls in the first stage, as well as almost all cases and controls of the second stages were obtained from BioBank Japan. BioBank Japan is a hospital-based disease cohort of 47 common diseases including AF, in which 66 clinical hospitals in Japan participated. Cases in this study are participants of BioBank Japan enrolled between 2003 and 2006. We also enrolled AF samples from



Tokyo Medical and Dental University as part of the second stage. Control individuals for GWAS included participants free of AF who presented with at least one of the following 11 diseases registered in BioBank Japan: hepatic cirrhosis, osteoporosis, colorectal cancer, breast cancer, prostate cancer, lung cancer, uterine myoma, amyotrophic lateral sclerosis, drug eruption, gallbladder and bile duct cancer, and pancreatic cancer. Additional 906 healthy volunteers were recruited from Osaka-Midosuji Rotary Club. The controls in the replication study comprised 17,190 different participants enrolled from Biobank Japan as individuals suffering from one of the following diseases: liver cancer, uterine cervical cancer, chronic type B hepatitis, esophageal cancer, hematological malignancy, uterine endometrial cancer, ovarian cancer, pulmonary tuberculosis, keloid, febrile seizure, rheumatoid arthritis, gastric cancer, and adverse reaction to chemotherapy. Description of cohorts used at the discovery stage can be found in detail elsewhere.<sup>1</sup>

#### *Analysis of eQTLs*

We accessed the publicly available Genotype-Tissue Expression Portal (GTEx) of the Broad Institute of Harvard and MIT (available at: <http://www.broadinstitute.org/gtex/#>; accessed September 1<sup>st</sup>, 2013) for significant findings in various tissues including subcutaneous adipose tissue, tibial artery, whole blood, cardiac left ventricle, lung, skeletal muscle, tibial nerve, sun-exposed skin, and thyroid. We first searched GTEx for all 49 SNPs considered for replication analysis in Europeans as well as the 2 SNPs identified in Japanese. Second, for those SNPs exceeding or approaching genome-wide significance after replication (**Table 1**), we additionally searched for all proxy SNPs defined as those with at least moderate linkage disequilibrium ( $r^2 \geq 0.5$ ) with the sentinel SNPs.

For the analysis of human atrial tissue we obtained samples from the Cleveland Clinic Atrial Tissue Bank (ATB), which consists of atrial tissue samples from consented surgical and transplant donor patients of self-identified European descent obtained between 2001-2011 at the Cleveland Clinic. Samples were processed on the Illumina Human Hap550v3 or Hap610v1 chips and Illumina

HumanHT-12v3 or -v4 chips to obtain genotype and RNA expression data, respectively. Genotypes were called with the GenCall algorithm using the Illumina BeadStudio software; bead-level expression data were extracted using the R package beadarray.

SNP genotype data were filtered for Hardy-Weinberg equilibrium and call rate. Samples were filtered for excess heterozygosity, genetic relatedness, sex mismatch, call rate and genetic population outliers. Genotypes were subsequently passed to SHAPEIT v2 and IMPUTE v2 to generate imputed variant dosage data based on the 1000 Genomes cosmopolitan phase 1 integrated v3 reference panel. Imputed variants with a imputation information score  $<0.5$  were dropped, as were variants with a MAF  $<0.01$ .

Natural logarithm (ln)-transformed bead-level expression data were averaged to obtain probe-level measurements for each sample. Probes common to the Illumina Human HT-12v3/v4 chips were subset; missing data were imputed using a KNN method from the R package impute. Probe data were unlogged, background adjusted using a normal-gamma deconvolution method from the R package NormalGamma, ln-transformed with an offset of 10, and then quantile normalized using the R package beadarray. MDS plots were used to filter samples with aberrant expression profiles. Filtered and normalized data were then batch corrected at the chip level using the ComBat empirical-Bayes approach. Validity of the correction was assessed by examining duplicate samples run on multiple chips across batches. We dropped probes not uniquely mapping to the human Ensembl71 transcriptome and the IlluminaHumanv4 R annotation package, not mapping to autosomes, containing imputed variants with MAF  $\geq 0.01$ , and those that had  $<5$  samples with a detection p-value  $\leq 0.05$  or an interquartile range  $< \ln(1.2)$ .

We conducted a genome-wide cis eQTL analysis using the R package MatrixEQTL. For each probe and corresponding variant within 250kb of the probe's mapped gene boundaries (cis probe-variant pair), we linearly regressed the probe's expression values against the variant's imputed dosages along with sex, tissue location (LAA vs. PVT), the top 4 principal coordinates from a MDS

analysis of the genetic-relatedness matrix calculated from a subsample of the filtered genotyped SNPs, and 35 expression surrogate variables. The expression surrogate variables were included to reduce expression heterogeneity and improve power to detect eQTLs; they were calculated using the R package *sva* on the filtered expression data with a model including sex, principal coordinates and tissue location. For each *cis* probe-variant pair, we obtained the variant's linear regression coefficient and corresponding p-value under the null of no dosage effect. False discovery rate (FDR) values were calculated from the p-values using the Benjamini and Hochberg method. *Cis* probe-variant pairs with an FDR value <0.05 were considered genome-wide significant.

#### *Knockdown of candidate genes in zebrafish*

Zebrafish of the Tübingen/AB strain were maintained according to standard methods. Morpholino oligonucleotides (MOs) designed to disrupt the proper splicing or translation of zebrafish genes *neurla* (Exon1/Intron1 (1), Exon2/Intron2 (2), 5'UTR (3)), *cand2* (Exon1/Intron1), *cand1* (Exon3/Intron3 (1), Exon10/Intron10 (2)), and *cux2b* (Exon12/Intron12)) were obtained from Genetools LLC (Corvallis, OR, USA). A non-targeting MO of equal length was utilized as a control for non-specific toxicity. MOs were diluted in injection buffer (0.4 mM MgSO<sub>4</sub>, 0.6 mM CaCl<sub>2</sub>, 0.7 mM KCl, 58 mM NaCl, 25 mM HEPES pH 7.1) and microinjected into the yolks of single cell stage embryos at a final concentration of 0.2 mM in a standardized volume. Consistent injection volumes were confirmed by measurement of 100 µm droplet diameters after injection into mineral oil. Post injection, all embryos were maintained at 28°C in E3 embryo media supplemented with 0.0005% methylene blue and 0.003% phenylthiourea. Effective knockdown was confirmed by RT-PCR analysis of *neurla*(1) and *cand2*, and by semi-quantitative PCR of *cand1*(1,2), *neurla*(2), and *cux2b*. In brief, mRNA was extracted from 72 hours post fertilization (hpf) embryos using Trizol according to manufacturer's instructions, followed by cDNA production by iScript (BioRad). RT-PCR analysis was conducted using SYBR green supermix (BioRad) on a BioRad CFX384 Real-Time System. *ef-1α* and *β-*

*actin* were utilized as reference genes for  $\Delta\Delta$ ct analysis of relative gene expression. All MOs and primers sequences are listed in **Supplemental Table 8**.

Color brightfield images of morpholino-injected embryos were obtained on an Olympus SZX16 microscope at 72 hpf. Heart rate measurement was accomplished at 72 hpf by phase contrast imaging on a Nikon Eclipse Ti base equipped with a Hamamatsu Orca-Flashcam 2.8. Effective frame rate of acquisition was 45 fps. Heart rate was determined manually using ImageJ version 1.47. Measurements of cardiac contractility were conducted according to methods published previously,<sup>13</sup> although with slight modifications. In brief, 72 hpf embryos were anesthetized in 0.016% MS222 (Sigma Aldrich) and positioned for viewing of the ventral surface in 1% agarose dissolved in E3 medium. Ventricular contractility was assayed by measuring the change in inner wall diameter through 3 cardiac cycles when measured perpendicular to the blood flow. Optical mapping was performed to assay action potential durations at 72hpf as previously described.<sup>14</sup>

Supplemental Table 1. Characteristics of the study cohorts

| Europeans                                         |          |        |             |        |        |                        |             |       |        |
|---------------------------------------------------|----------|--------|-------------|--------|--------|------------------------|-------------|-------|--------|
| Cohorts used for replication by direct genotyping |          |        |             |        |        |                        |             |       |        |
|                                                   |          | n      | Age, years  | Men, % | HTN, % | BMI, kg/m <sup>2</sup> | Diabetes, % | MI, % | CHF, % |
| AFNET / KORA                                      | Cases    | 1,780  | 61.6 ± 12.5 | 71     | 60     | 27.5 ± 4.3             | 9           | 4     | 6      |
|                                                   | Controls | 3,604  | 48.3 ± 14.3 | 49     | 18     | 27.1 ± 4.7             | 4           | 2     | 3      |
| DANFIB                                            | Cases    | 396    | 43.4 ± 2.1  | 77     | 22     | 26.9 ± 4.8             | 4           | 4     | 6      |
|                                                   | Controls | 750    | 61.5 ± 17.4 | 52     | 58     | 26.7 ± 4.4             | 4           | 2     | 0      |
| HVH                                               | Cases    | 647    | 74.0 ± 9.1  | 39     | 76     | 30.3 ± 7.1             | 16          | 9     | 7      |
|                                                   | Controls | 1,076  | 72.5 ± 8.2  | 36     | 77     | 29.0 ± 5.8             | 13          | 6     | 3      |
| MAC                                               | Cases    | 2,316  | 64.8 ± 7.4  | 63     | 83     | 27.3 ± 4.4             | 8           | 7     | 4      |
|                                                   | Controls | 2,322  | 64.8 ± 7.4  | 63     | 72     | 26.3 ± 3.9             | 5           | -     | -      |
| MGH                                               | Cases    | 181    | 59.7 ± 11.3 | 75     | 55     | 28.7 ± 5.8             | 8           | 4     | 8      |
|                                                   | Controls | 362    | 68.9 ± 11.6 | 53     | 61     | 27.0 ± 5.0             | -           | -     | -      |
| Ottawa                                            | Cases    | 301    | 47.2 ± 11.4 | 80     | 22     | -                      | -           | -     | -      |
|                                                   | Controls | 1,517  | 75.1 ± 5.4  | 48     | 43     | 26.4 ± 4.1             | -           | -     | -      |
| Cohorts used for <i>in-silico</i> replication     |          |        |             |        |        |                        |             |       |        |
|                                                   |          | n      | Age, years  | Men, % | HTN, % | BMI, kg/m <sup>2</sup> | Diabetes, % | MI, % | CHF, % |
| HealthABC                                         | Cases    | 434    | 74.1 ± 2.9  | 61     | 66     | 27.2 ± 4.3             | 20          | 26    | 3      |
|                                                   | Controls | 1,100  | 73.6 ± 2.8  | 49     | 60     | 26.4 ± 4.1             | 16          | 16    | 1      |
| PROSPER                                           | Cases    | 505    | 76.0 ± 3.5  | 58     | 64     | 27.1 ± 4.3             | 11          | 19    | 0      |
|                                                   | Controls | 4,739  | 75.3 ± 3.3  | 47     | 62     | 26.8 ± 4.2             | 10          | 13    | 0      |
| RS-II                                             | Cases    | 131    | 71.9 ± 9.6  | 55     | 76     | 27.3 ± 3.6             | 18          | 8     | 5      |
|                                                   | Controls | 1,674  | 64.6 ± 7.8  | 55     | 60     | 27.3 ± 4.3             | 10          | 3     | 1      |
| Japanese                                          |          |        |             |        |        |                        |             |       |        |
| GWAS                                              | Cases    | 843    | 67.3 ± 10.4 | 69     | 78     | 23.9 ± 3.6             | 45          | 20    | -      |
|                                                   | Controls | 3,350  | 52.4 ± 15.2 | 54     | 33     | 22.5 ± 3.7             | 8           | 2     | -      |
| Second stage                                      | Cases    | 1,618  | 67.8 ± 10.2 | 72     | 71     | 23.3 ± 3.6             | 20          | 12.9  | -      |
|                                                   | Controls | 17,190 | 61.1 ± 12.8 | 44     | 42     | 22.2 ± 3.7             | 0           | 0     | -      |
| Third stage                                       | Cases    | 5,912  | 68.2 ± 10.4 | 70     | 74     | 23.5 ± 3.4             | 14          | 18    | -      |

HTN – hypertension, defined as systolic blood pressure >140 mmHg, or diastolic blood pressure >90 mmHg, or antihypertensive treatment.  
 BMI – body mass index; Diabetes – diabetes mellitus; MI – myocardial infarction; CHF – heart failure. “-” – data not available.

| <b>Supplemental Table 2. <i>In-silico</i> replication genotyping information.</b> |                         |                       |                                         |
|-----------------------------------------------------------------------------------|-------------------------|-----------------------|-----------------------------------------|
| <b>Study</b>                                                                      | <b>HealthABC</b>        | <b>PROSPER</b>        | <b>RS-II</b>                            |
| <b>Reference</b>                                                                  | -                       | 4                     | 5                                       |
| <b>Genotyping platform</b>                                                        | Illumina<br>Human1M-Duo | Illumina<br>Human660K | Illumina550K<br>Duo, 610KQuad           |
| <b>Calling Software</b>                                                           | BeadChip                | Beadstudio            | GenomeStudio                            |
| <b>Callrate / SNP</b>                                                             | <97%                    | <97.5%                | <98%                                    |
| <b>HWE p-value</b>                                                                | <10 <sup>-6</sup>       | NA                    | <10 <sup>-6</sup>                       |
| <b>Mendelian Errors</b>                                                           | NA                      | NA                    | NA                                      |
| <b>Excess heterozygosity</b>                                                      | NA                      | NA                    | Excluded F-values < mean-4SD (F<-0.055) |
| <b>MAF</b>                                                                        | <1%                     | NA                    | <5%                                     |
| <b>SNP for imputation</b>                                                         | 914,263                 | 557,192               | 537,405                                 |
| <b>Total SNPs</b>                                                                 | 2,543,887               | 2,543,887             | 2,541,494                               |
| <b>Imputation software</b>                                                        | MACH v1.0.16            | MACH                  | Mach v1.0.16                            |
| <b>Imputation backbone</b>                                                        | Build 36                | Build 36              | Build 36                                |
| <b>Inflation factor <math>\lambda</math></b>                                      | 1.004                   | -                     | 1.006                                   |
| <b>Analysis software</b>                                                          | R                       | ProbABEL              | ProbABEL, R                             |

**Supplemental Table 3. SNP replication results in Europeans, by cohort**

| SNP        | AF   |                    | Direct genotyping      |                    |                       |                    |                       |                    |                       |                    |                       |                    | In-silico Replication |                    |                       |                     |                       |                    |                        |
|------------|------|--------------------|------------------------|--------------------|-----------------------|--------------------|-----------------------|--------------------|-----------------------|--------------------|-----------------------|--------------------|-----------------------|--------------------|-----------------------|---------------------|-----------------------|--------------------|------------------------|
|            | Risk | Allele             | AFNET                  |                    | DANFIB                |                    | HVH                   |                    | MAC                   |                    | MGH                   |                    | Ottawa                |                    | HealthABC             |                     | PROSPER               |                    | RS-II                  |
|            |      | RR (95% CI)        | P value                | RR (95% CI)        | P value               | RR (95% CI)        | P value               | RR (95% CI)        | P value               | RR (95% CI)        | P value               | RR (95% CI)        | P value               | RR (95% CI)        | P value               | RR (95% CI)         | P value               | RR (95% CI)        | P value                |
| rs10137710 | T    | 1.02 (0.89 - 1.16) | 7.8x10 <sup>-01</sup>  | 1.18 (0.90 - 1.54) | 2.4x10 <sup>-01</sup> | 0.97 (0.80 - 1.17) | 7.2x10 <sup>-01</sup> | 1.08 (0.97 - 1.21) | 1.7x10 <sup>-01</sup> | 1.16 (0.91 - 1.47) | 2.4x10 <sup>-01</sup> | -                  | -                     | 1.01 (0.83 - 1.23) | 9.3x10 <sup>-01</sup> | 0.88 (0.73 - 1.05)  | 1.6x10 <sup>-01</sup> | 0.91 (0.64 - 1.30) | 5.9x10 <sup>-01</sup>  |
| rs10212121 | A    | 0.90 (0.82 - 1.00) | 4.7x10 <sup>-02</sup>  | 1.21 (0.95 - 1.53) | 1.2x10 <sup>-01</sup> | 1.03 (0.89 - 1.19) | 7.2x10 <sup>-01</sup> | 0.97 (0.89 - 1.06) | 5.2x10 <sup>-01</sup> | 1.01 (0.83 - 1.23) | 9.1x10 <sup>-01</sup> | -                  | -                     | 1.03 (0.88 - 1.21) | 6.9x10 <sup>-01</sup> | 0.91 (0.79 - 1.05)  | 2.2x10 <sup>-01</sup> | 1.09 (0.84 - 1.42) | 5.25x10 <sup>-01</sup> |
| rs10267684 | T    | 0.99 (0.89 - 1.10) | 8.6x10 <sup>-01</sup>  | 1.16 (0.92 - 1.45) | 2.1x10 <sup>-01</sup> | 0.95 (0.82 - 1.10) | 5.1x10 <sup>-01</sup> | 1.03 (0.94 - 1.13) | 5.3x10 <sup>-01</sup> | 1.31 (1.08 - 1.59) | 6.6x10 <sup>-03</sup> | -                  | -                     | 1.05 (0.89 - 1.23) | 5.7x10 <sup>-01</sup> | 0.97 (0.84 - 1.12)  | 6.8x10 <sup>-01</sup> | 1.04 (0.79 - 1.38) | 7.3x10 <sup>-01</sup>  |
| rs10507248 | T    | 1.23 (1.10 - 1.37) | 1.5x10 <sup>-04</sup>  | 1.06 (0.83 - 1.35) | 6.2x10 <sup>-01</sup> | 1.02 (0.88 - 1.19) | 7.9x10 <sup>-01</sup> | 1.14 (1.03 - 1.25) | 9.0x10 <sup>-03</sup> | 1.10 (0.89 - 1.35) | 3.8x10 <sup>-01</sup> | -                  | -                     | 1.00 (0.85 - 1.18) | 9.9x10 <sup>-01</sup> | 1.05 (0.91 - 1.22)  | 5.1x10 <sup>-01</sup> | 1.04 (0.78 - 1.37) | 8.0x10 <sup>-01</sup>  |
| rs10762941 | A    | 1.03 (0.93 - 1.14) | 5.3x10 <sup>-01</sup>  | 0.91 (0.73 - 1.12) | 3.7x10 <sup>-01</sup> | 1.15 (1.00 - 1.32) | 5.3x10 <sup>-02</sup> | 0.97 (0.89 - 1.05) | 4.2x10 <sup>-01</sup> | 0.89 (0.74 - 1.07) | 2.0x10 <sup>-01</sup> | -                  | -                     | 1.04 (0.89 - 1.20) | 6.4x10 <sup>-01</sup> | 1.01 (0.88 - 1.15)  | 9.3x10 <sup>-01</sup> | 0.80 (0.61 - 1.06) | 1.1x10 <sup>-01</sup>  |
| rs10800507 | C    | 1.14 (1.03 - 1.27) | 1.0x10 <sup>-02</sup>  | 1.12 (0.91 - 1.39) | 2.9x10 <sup>-01</sup> | 1.01 (0.88 - 1.16) | 9.2x10 <sup>-01</sup> | 1.08 (0.99 - 1.18) | 8.5x10 <sup>-02</sup> | 1.15 (0.96 - 1.37) | 1.4x10 <sup>-01</sup> | -                  | -                     | 1.00 (0.86 - 1.16) | 9.7x10 <sup>-01</sup> | 0.95 (0.83 - 1.09)  | 4.9x10 <sup>-01</sup> | 1.08 (0.83 - 1.39) | 6.1x10 <sup>-01</sup>  |
| rs10849152 | T    | 0.93 (0.83 - 1.02) | 1.01x10 <sup>-01</sup> | 1.08 (0.86 - 1.33) | 5.1x10 <sup>-01</sup> | 1.08 (0.93 - 1.23) | 3.1x10 <sup>-01</sup> | 0.99 (0.91 - 1.08) | 8.3x10 <sup>-01</sup> | 1.05 (0.88 - 1.27) | 5.4x10 <sup>-01</sup> | -                  | -                     | 0.85 (0.73 - 0.98) | 3.0x10 <sup>-02</sup> | 1.20 (1.05 - 1.37)  | 7.3x10 <sup>-03</sup> | 1.19 (0.92 - 1.54) | 2.0x10 <sup>-01</sup>  |
| rs10919369 | T    | 1.13 (1.00 - 1.27) | 4.3x10 <sup>-02</sup>  | 1.03 (0.82 - 1.31) | 7.8x10 <sup>-01</sup> | 0.87 (0.74 - 1.03) | 1.2x10 <sup>-01</sup> | 1.08 (0.98 - 1.19) | 1.0x10 <sup>-01</sup> | 1.25 (1.00 - 1.55) | 4.5x10 <sup>-02</sup> | -                  | -                     | 1.06 (0.89 - 1.25) | 5.4x10 <sup>-01</sup> | 1.04 (0.88 - 1.22)  | 6.7x10 <sup>-01</sup> | 0.84 (0.61 - 1.17) | 3.1x10 <sup>-01</sup>  |
| rs10947261 | G    | 1.2 (1.01 - 1.43)  | 3.7x10 <sup>-02</sup>  | 1.45 (0.93 - 2.22) | 1.0x10 <sup>-01</sup> | 1.15 (0.88 - 1.49) | 3.1x10 <sup>-01</sup> | 1.01 (0.87 - 1.16) | 9.4x10 <sup>-01</sup> | 1.14 (0.82 - 1.59) | 4.4x10 <sup>-01</sup> | -                  | -                     | 0.93 (0.71 - 1.20) | 5.7x10 <sup>-01</sup> | 0.93 (0.70 - 1.20)  | 5.5x10 <sup>-01</sup> | 0.93 (0.58 - 1.47) | 7.5x10 <sup>-01</sup>  |
| rs11466656 | C    | -                  | -                      | -                  | -                     | -                  | -                     | -                  | -                     | -                  | -                     | -                  | -                     | 10.00 (0.01 -)     | 5.3x10 <sup>-01</sup> | 0.23 (0.00 - 50.00) | 6.0x10 <sup>-01</sup> | 0.29 (0.00 -)      | 8.1x10 <sup>-01</sup>  |
| rs12370365 | G    | 1.11 (0.99 - 1.25) | 7.3x10 <sup>-02</sup>  | 0.99 (0.76 - 1.30) | 9.4x10 <sup>-01</sup> | 1.28 (1.09 - 1.54) | 4.0x10 <sup>-03</sup> | 1.06 (0.96 - 1.18) | 2.3x10 <sup>-01</sup> | 1.12 (0.91 - 1.39) | 3.0x10 <sup>-01</sup> | -                  | -                     | 1.05 (0.88 - 1.25) | 5.8x10 <sup>-01</sup> | 1.02 (0.87 - 1.20)  | 7.8x10 <sup>-01</sup> | 1.16 (0.83 - 1.61) | 3.7x10 <sup>-01</sup>  |
| rs12406668 | T    | 1.00 (0.84 - 1.19) | 9.9x10 <sup>-01</sup>  | 1.17 (0.78 - 1.75) | 4.6x10 <sup>-01</sup> | 0.86 (0.66 - 1.13) | 2.8x10 <sup>-01</sup> | 1.07 (0.91 - 1.26) | 4.2x10 <sup>-01</sup> | 1.16 (0.83 - 1.62) | 3.9x10 <sup>-01</sup> | -                  | -                     | 0.97 (0.75 - 1.26) | 8.2x10 <sup>-01</sup> | 0.9 (0.69 - 1.17)   | 4.3x10 <sup>-01</sup> | 0.86 (0.5 - 1.50)  | 6.1x10 <sup>-01</sup>  |
| rs12415501 | T    | 1.31 (1.16 - 1.49) | 2.0x10 <sup>-05</sup>  | -                  | -                     | 1.05 (0.88 - 1.26) | 5.7x10 <sup>-01</sup> | 1.27 (1.14 - 1.41) | 2.0x10 <sup>-05</sup> | -                  | -                     | 1.11 (0.87 - 1.41) | 4.0x10 <sup>-1</sup>  | 1.03 (0.85 - 1.24) | 7.6x10 <sup>-01</sup> | 1.31 (1.07 - 1.60)  | 9.0x10 <sup>-03</sup> | 1.30 (0.93 - 1.82) | 1.3x10 <sup>-01</sup>  |
| rs12733930 | C    | 0.90 (0.80 - 1.02) | 1.1x10 <sup>-01</sup>  | 0.95 (0.74 - 1.23) | 7.3x10 <sup>-01</sup> | 1.09 (0.91 - 1.30) | 3.6x10 <sup>-01</sup> | 1.05 (0.94 - 1.16) | 3.5x10 <sup>-01</sup> | 1.12 (0.89 - 1.41) | 3.1x10 <sup>-01</sup> | -                  | -                     | 0.94 (0.79 - 1.12) | 5.2x10 <sup>-01</sup> | 1.04 (0.89 - 1.23)  | 5.8x10 <sup>-01</sup> | 1.00 (0.72 - 1.39) | 1.0x10 <sup>-00</sup>  |
| rs12991989 | C    | 1.09 (0.99 - 1.20) | 9.3x10 <sup>-02</sup>  | 1.02 (0.83 - 1.27) | 8.5x10 <sup>-01</sup> | 0.90 (0.78 - 1.04) | 1.5x10 <sup>-01</sup> | 0.97 (0.89 - 1.05) | 4.3x10 <sup>-01</sup> | 1.12 (0.94 - 1.35) | 1.9x10 <sup>-01</sup> | -                  | -                     | 1.11 (0.95 - 1.28) | 1.8x10 <sup>-01</sup> | 0.99 (0.86 - 1.12)  | 8.3x10 <sup>-01</sup> | 0.90 (0.69 - 1.18) | 4.5x10 <sup>-01</sup>  |
| rs13169864 | G    | 1.02 (0.91 - 1.15) | 7.4x10 <sup>-01</sup>  | 1.10 (0.85 - 1.45) | 4.6x10 <sup>-01</sup> | 1.01 (0.85 - 1.19) | 9.0x10 <sup>-01</sup> | 0.95 (0.85 - 1.05) | 3.4x10 <sup>-01</sup> | 1.19 (0.96 - 1.47) | 1.2x10 <sup>-01</sup> | -                  | -                     | 1.23 (1.00 - 1.52) | 5.4x10 <sup>-02</sup> | 1.11 (0.93 - 1.33)  | 2.6x10 <sup>-01</sup> | 1.43 (0.93 - 2.22) | 1.0x10 <sup>-01</sup>  |
| rs13216675 | T    | 1.19 (1.08 - 1.33) | 1.0x10 <sup>-03</sup>  | 1.11 (0.88 - 1.41) | 3.5x10 <sup>-01</sup> | 0.97 (0.83 - 1.13) | 6.7x10 <sup>-01</sup> | 1.06 (0.98 - 1.16) | 1.4x10 <sup>-01</sup> | 1.02 (0.83 - 1.25) | 8.5x10 <sup>-01</sup> | -                  | -                     | 1.03 (0.88 - 1.20) | 6.9x10 <sup>-01</sup> | 1.2 (1.04 - 1.39)   | 1.4x10 <sup>-02</sup> | 1.16 (0.87 - 1.54) | 3.1x10 <sup>-01</sup>  |
| rs1324739  | G    | 1.29 (0.87 - 1.90) | 2.0x10 <sup>-01</sup>  | 1.02 (0.53 - 1.94) | 9.6x10 <sup>-01</sup> | 1.63 (1.08 - 2.47) | 2.1x10 <sup>-02</sup> | 0.98 (0.77 - 1.23) | 8.3x10 <sup>-01</sup> | 1.27 (0.70 - 2.30) | 4.3x10 <sup>-01</sup> | -                  | -                     | 0.71 (0.43 - 1.17) | 1.8x10 <sup>-01</sup> | 0.74 (0.47 - 1.17)  | 2.0x10 <sup>-01</sup> | 0.61 (0.21 - 1.78) | 3.7x10 <sup>-01</sup>  |
| rs13396611 | T    | 1.29 (0.99 - 1.67) | 5.5x10 <sup>-02</sup>  | 0.86 (0.47 - 1.58) | 6.2x10 <sup>-01</sup> | 0.74 (0.50 - 1.11) | 1.5x10 <sup>-01</sup> | 0.81 (0.64 - 1.03) | 7.9x10 <sup>-02</sup> | 1.01 (0.65 - 1.58) | 9.7x10 <sup>-01</sup> | -                  | -                     | 1.31 (0.91 - 1.88) | 1.4x10 <sup>-01</sup> | 0.79 (0.51 - 1.23)  | 3.0x10 <sup>-01</sup> | 0.71 (0.32 - 1.59) | 4.1x10 <sup>-01</sup>  |
| rs2118254  | C    | 1.00 (0.91 - 1.09) | 9.5x10 <sup>-01</sup>  | 1.04 (0.85 - 1.28) | 7.0x10 <sup>-01</sup> | 1.25 (1.10 - 1.42) | 1.0x10 <sup>-03</sup> | 0.98 (0.91 - 1.06) | 6.4x10 <sup>-01</sup> | 1.01 (0.85 - 1.19) | 9.5x10 <sup>-01</sup> | -                  | -                     | 1.01 (0.87 - 1.17) | 9.1x10 <sup>-01</sup> | 1.00 (0.87 - 1.14)  | 9.5x10 <sup>-01</sup> | 1.16 (0.89 - 1.50) | 2.7x10 <sup>-01</sup>  |
| rs2204224  | T    | -                  | -                      | -                  | -                     | -                  | -                     | -                  | -                     | -                  | -                     | -                  | -                     | 1.00 (0.79 - 1.27) | 9.8x10 <sup>-01</sup> | 0.91 (0.73 - 1.13)  | 3.9x10 <sup>-01</sup> | 1.1 (0.72 - 1.69)  | 6.6x10 <sup>-01</sup>  |
| rs2249965  | A    | 0.92 (0.82 - 1.02) | 1.0x10 <sup>-01</sup>  | 1.00 (0.80 - 1.24) | 9.7x10 <sup>-01</sup> | 0.99 (0.86 - 1.15) | 9.1x10 <sup>-01</sup> | 1.03 (0.94 - 1.12) | 5.1x10 <sup>-01</sup> | 1.04 (0.87 - 1.26) | 6.4x10 <sup>-01</sup> | -                  | -                     | 1.15 (0.99 - 1.35) | 7.5x10 <sup>-02</sup> | 0.99 (0.86 - 1.14)  | 8.7x10 <sup>-01</sup> | 0.92 (0.69 - 1.22) | 5.6x10 <sup>-01</sup>  |
| rs2305398  | G    | 1.12 (1.02 - 1.25) | 2.3x10 <sup>-02</sup>  | 1.08 (0.86 - 1.33) | 5.2x10 <sup>-01</sup> | 1.06 (0.93 - 1.23) | 3.7x10 <sup>-01</sup> | 1.09 (1.00 - 1.19) | 4.7x10 <sup>-02</sup> | 0.93 (0.76 - 1.11) | 4.0x10 <sup>-01</sup> | -                  | -                     | 0.97 (0.83 - 1.12) | 6.6x10 <sup>-01</sup> | 1.04 (0.91 - 1.19)  | 5.5x10 <sup>-01</sup> | 0.99 (0.75 - 1.30) | 9.2x10 <sup>-01</sup>  |
| rs2358891  | G    | -                  | -                      | -                  | -                     | -                  | -                     | -                  | -                     | -                  | -                     | -                  | -                     | 1.19 (1.00 - 1.41) | 5.3x10 <sup>-02</sup> | 1.03 (0.88 - 1.20)  | 6.8x10 <sup>-01</sup> | 1.23 (0.89 - 1.69) | 2.1x10 <sup>-01</sup>  |
| rs2532144  | T    | 1.10 (1.00 - 1.22) | 5.1x10 <sup>-02</sup>  | 0.78 (0.62 - 0.99) | 3.8x10 <sup>-02</sup> | 1.09 (0.94 - 1.25) | 2.5x10 <sup>-01</sup> | 1.12 (0.98 - 1.28) | 1.0x10 <sup>-01</sup> | 1.03 (0.86 - 1.22) | 7.4x10 <sup>-01</sup> | -                  | -                     | 0.99 (0.85 - 1.15) | 9.0x10 <sup>-01</sup> | 0.92 (0.79 - 1.05)  | 2.2x10 <sup>-01</sup> | 1.18 (0.88 - 1.56) | 2.5x10 <sup>-01</sup>  |
| rs2685217  | T    | 1.02 (0.91 - 1.14) | 7.4x10 <sup>-01</sup>  | 0.87 (0.67 - 1.12) | 2.8x10 <sup>-01</sup> | 1.04 (0.88 - 1.22) | 6.8x10 <sup>-01</sup> | 0.98 (0.89 - 1.08) | 7.0x10 <sup>-01</sup> | 1.01 (0.82 - 1.24) | 9.3x10 <sup>-01</sup> | -                  | -                     | 1.05 (0.88 - 1.26) | 5.6x10 <sup>-01</sup> | 1.06 (0.90 - 1.24)  | 5.1x10 <sup>-01</sup> | 1.03 (0.75 - 1.41) | 8.8x10 <sup>-01</sup>  |
| rs2723065  | A    | 1.05               | 3.0x10 <sup>-01</sup>  | 0.90               | 3.4x10 <sup>-01</sup> | 1.12               | 1.2x10 <sup>-01</sup> | 1.01               | 8.1x10 <sup>-01</sup> | 1.22               | 4.7x10 <sup>-02</sup> | -                  | -                     | 1.14               | 1.1x10 <sup>-01</sup> | 1.15                | 4.6x10 <sup>-02</sup> | 0.91               | 4.8x10 <sup>-01</sup>  |

**Supplemental Table 3. SNP replication results in Europeans, by cohort**

|            | AF   | Direct genotyping     |                       |                       |                       |                       |                       |                       |                       |                       |                       | In-silico Replication |                      |                       |                       |                        |                       |                       |                        |
|------------|------|-----------------------|-----------------------|-----------------------|-----------------------|-----------------------|-----------------------|-----------------------|-----------------------|-----------------------|-----------------------|-----------------------|----------------------|-----------------------|-----------------------|------------------------|-----------------------|-----------------------|------------------------|
|            | Risk | AFNET                 |                       | DANFIB                |                       | HVH                   |                       | MAC                   |                       | MGH                   |                       | Ottawa                |                      | HealthABC             |                       | PROSPER                |                       | RS-II                 |                        |
|            |      | (0.95 - 1.16)         |                       | (0.72 - 1.12)         |                       | (0.97 - 1.30)         |                       | (0.93 - 1.10)         |                       | (1.00 - 1.47)         |                       |                       |                      | (0.97 - 1.32)         |                       | (1.00 - 1.32)          |                       | (0.70 - 1.19)         |                        |
| rs276857   | G    | 1.15<br>(0.99 - 1.34) | 6.6x10 <sup>-02</sup> | 0.93<br>(0.67 - 1.28) | 6.4x10 <sup>-01</sup> | 0.95<br>(0.78 - 1.17) | 6.4x10 <sup>-01</sup> | 1.08<br>(0.96 - 1.21) | 2.0x10 <sup>-01</sup> | 1.14<br>(0.86 - 1.51) | 3.5x10 <sup>-01</sup> | -                     | -                    | 1.06<br>(0.85 - 1.33) | 6.0x10 <sup>-01</sup> | 1.08<br>(0.86 - 1.35)  | 5.2x10 <sup>-01</sup> | 0.81<br>(0.50 - 1.33) | 4.2x10 <sup>-01</sup>  |
| rs3780190  | G    | 1.18<br>(1.06 - 1.30) | 1.0x10 <sup>-03</sup> | 0.85<br>(0.68 - 1.05) | 1.3x10 <sup>-01</sup> | 1.00<br>(0.88 - 1.15) | 9.7x10 <sup>-01</sup> | 1.03<br>(0.94 - 1.12) | 4.9x10 <sup>-01</sup> | 1.01<br>(0.85 - 1.20) | 8.7x10 <sup>-01</sup> | -                     | -                    | 1.05<br>(0.91 - 1.22) | 5.0x10 <sup>-01</sup> | 1.05<br>(0.93 - 1.20)  | 4.4x10 <sup>-01</sup> | 1.16<br>(0.89 - 1.54) | 2.6x10 <sup>-01</sup>  |
| rs3922843  | A    | 1.02<br>(0.92 - 1.15) | 6.7x10 <sup>-01</sup> | 1.02<br>(0.79 - 1.31) | 9.0x10 <sup>-01</sup> | 0.96<br>(0.82 - 1.12) | 6.1x10 <sup>-01</sup> | 1.10<br>(1.00 - 1.21) | 4.3x10 <sup>-02</sup> | 1.17<br>(0.96 - 1.42) | 1.2x10 <sup>-01</sup> | -                     | -                    | 1.13<br>(0.96 - 1.33) | 1.5x10 <sup>-01</sup> | 1.06<br>(0.92 - 1.24)  | 4.2x10 <sup>-01</sup> | 0.89<br>(0.65 - 1.21) | 4.6x10 <sup>-01</sup>  |
| rs4238314  | A    | 1.04<br>(0.94 - 1.14) | 4.8x10 <sup>-01</sup> | 1.21<br>(0.97 - 1.52) | 8.9x10 <sup>-02</sup> | 1.00<br>(0.87 - 1.16) | 9.5x10 <sup>-01</sup> | 1.01<br>(0.93 - 1.09) | 8.6x10 <sup>-01</sup> | 1.08<br>(0.91 - 1.28) | 3.9x10 <sup>-01</sup> | -                     | -                    | 0.96<br>(0.83 - 1.12) | 6.3x10 <sup>-01</sup> | 0.98<br>(0.85 - 1.12)  | 7.4x10 <sup>-01</sup> | 1.00<br>(0.76 - 1.31) | 9.9x10 <sup>-01</sup>  |
| rs4642101  | G    | 1.16<br>(1.05 - 1.30) | 4.2x10 <sup>-03</sup> | -                     | -                     | 1.15<br>(0.99 - 1.33) | 6.4x10 <sup>-02</sup> | 1.11<br>(1.01 - 1.20) | 2.4x10 <sup>-02</sup> | -                     | -                     | 1.19<br>(0.83 - 1.45) | 8.5x10 <sup>-2</sup> | 0.96<br>(0.83 - 1.18) | 6.3x10 <sup>-01</sup> | 1.03<br>(0.89 - 1.18)  | 7.1x10 <sup>-01</sup> | 0.85<br>(0.65 - 1.10) | 2.2x10 <sup>-01</sup>  |
| rs4824051  | C    | 1.09<br>(0.97 - 1.20) | 1.6x10 <sup>-01</sup> | 1.12<br>(0.87 - 1.47) | 3.6x10 <sup>-01</sup> | 1.22<br>(1.03 - 1.45) | 2.3x10 <sup>-02</sup> | 1.00<br>(0.90 - 1.10) | 9.3x10 <sup>-01</sup> | 0.93<br>(0.75 - 1.16) | 5.4x10 <sup>-01</sup> | -                     | -                    | 1.05<br>(0.88 - 1.27) | 5.8x10 <sup>-01</sup> | 1.05<br>(0.89 - 1.23)  | 5.3x10 <sup>-01</sup> | 1.10<br>(0.81 - 1.52) | 5.4x10 <sup>-01</sup>  |
| rs56235003 |      | 0.56<br>(0.41 - 0.76) | 9.2x10 <sup>-05</sup> | 0.96<br>(0.31 - 2.94) | 9.5x10 <sup>-01</sup> | 0.89<br>(0.40 - 1.95) | 7.7x10 <sup>-01</sup> | -                     | -                     | 0.94<br>(0.44 - 2.01) | 8.7x10 <sup>-01</sup> | -                     | -                    | -                     | -                     | -                      | -                     | -                     | -                      |
| rs6062468  | C    | 1.03<br>(0.94 - 1.14) | 5.3x10 <sup>-01</sup> | 1.04<br>(0.84 - 1.28) | 7.5x10 <sup>-01</sup> | 0.99<br>(0.86 - 1.14) | 8.8x10 <sup>-01</sup> | 0.97<br>(0.89 - 1.05) | 4.3x10 <sup>-01</sup> | 1.03<br>(0.85 - 1.24) | 7.9x10 <sup>-01</sup> | -                     | -                    | 0.98<br>(0.85 - 1.13) | 8.1x10 <sup>-01</sup> | 1.16<br>(1.01 - 1.34)  | 4.2x10 <sup>-02</sup> | 1.31<br>(0.98 - 1.74) | 6.7x10 <sup>-02</sup>  |
| rs6540690  | C    | 1.11<br>(0.98 - 1.25) | 1.1x10 <sup>-01</sup> | 0.95<br>(0.74 - 1.22) | 7.1x10 <sup>-01</sup> | 0.89<br>(0.75 - 1.05) | 1.9x10 <sup>-01</sup> | 0.98<br>(0.88 - 1.09) | 7.2x10 <sup>-01</sup> | 1.12<br>(0.91 - 1.41) | 2.8x10 <sup>-01</sup> | -                     | -                    | 0.99<br>(0.83 - 1.18) | 9.2x10 <sup>-01</sup> | 0.85<br>(0.72 - 1.01)  | 6.8x10 <sup>-02</sup> | 0.92<br>(0.65 - 1.28) | 560x10 <sup>-01</sup>  |
| rs6749773  | A    | 0.93<br>(0.85 - 1.03) | 1.8x10 <sup>-01</sup> | 0.91<br>(0.73 - 1.13) | 3.9x10 <sup>-01</sup> | 1.06<br>(0.92 - 1.22) | 4.1x10 <sup>-01</sup> | 1.01<br>(0.93 - 1.09) | 2.0x10 <sup>-01</sup> | 0.95<br>(0.79 - 1.14) | 6.1x10 <sup>-01</sup> | -                     | -                    | 1.13<br>(0.98 - 1.31) | 9.9x10 <sup>-02</sup> | 1.00<br>(0.88 - 1.14)  | 9.9x10 <sup>-01</sup> | 1.13<br>(0.87 - 1.48) | 3.61x10 <sup>-01</sup> |
| rs6882776  | A    | 0.95<br>(0.85 - 1.06) | 3.9x10 <sup>-01</sup> | 1.02<br>(0.81 - 1.29) | 8.7x10 <sup>-01</sup> | 0.83<br>(0.71 - 0.97) | 1.8x10 <sup>-02</sup> | 0.91<br>(0.83 - 1.00) | 3.9x10 <sup>-02</sup> | 0.83<br>(0.68 - 1.01) | 6.4x10 <sup>-02</sup> | -                     | -                    | 0.99<br>(0.84 - 1.16) | 8.8x10 <sup>-01</sup> | 1.02<br>(0.89 - 1.18)  | 7.5x10 <sup>-01</sup> | 0.97<br>(0.72 - 1.30) | 8.4x10 <sup>-01</sup>  |
| rs6884185  | C    | 1.08<br>(0.97 - 1.18) | 1.8x10 <sup>-01</sup> | 1.11<br>(0.88 - 1.39) | 3.7x10 <sup>-01</sup> | 0.98<br>(0.85 - 1.14) | 8.1x10 <sup>-01</sup> | 1.01<br>(0.93 - 1.10) | 7.8x10 <sup>-01</sup> | 1.08<br>(0.90 - 1.28) | 4.3x10 <sup>-01</sup> | -                     | -                    | 0.97<br>(0.82 - 1.15) | 7.3x10 <sup>-01</sup> | 1.11<br>(0.95 - 1.28)  | 2.0x10 <sup>-01</sup> | 0.91<br>(0.68 - 1.22) | 5.2x10 <sup>-01</sup>  |
| rs6968408  | C    | 0.98<br>(0.83 - 1.15) | 7.8x10 <sup>-01</sup> | 1.35<br>(0.93 - 1.96) | 1.2x10 <sup>-01</sup> | 0.79<br>(0.63 - 1.00) | 4.7x10 <sup>-02</sup> | 1.02<br>(0.89 - 1.18) | 7.3x10 <sup>-01</sup> | 1.11<br>(0.83 - 1.49) | 4.7x10 <sup>-01</sup> | -                     | -                    | 0.88<br>(0.69 - 1.14) | 3.2x10 <sup>-01</sup> | 0.76<br>(0.62 - 0.94)  | 1.3x10 <sup>-02</sup> | 0.88<br>(0.57 - 1.35) | 5.6x10 <sup>-01</sup>  |
| rs7160770  | T    | 0.94<br>(0.85 - 1.04) | 2.8x10 <sup>-01</sup> | 0.88<br>(0.71 - 1.11) | 2.9x10 <sup>-01</sup> | 1.02<br>(0.88 - 1.18) | 7.8x10 <sup>-01</sup> | 0.96<br>(0.88 - 1.04) | 3.4x10 <sup>-01</sup> | 0.98<br>(0.82 - 1.18) | 8.4x10 <sup>-01</sup> | -                     | -                    | 1.08<br>(0.93 - 1.25) | 3.6x10 <sup>-01</sup> | 1.05<br>(0.93 - 1.20)  | 4.4x10 <sup>-01</sup> | 1.28<br>(0.98 - 1.67) | 7.0x10 <sup>-02</sup>  |
| rs7295704  | T    | 1.01<br>(0.90 - 1.14) | 8.8x10 <sup>-01</sup> | 1.40<br>(1.07 - 1.83) | 1.4x10 <sup>-02</sup> | 1.20<br>(1.01 - 1.42) | 4.2x10 <sup>-02</sup> | 0.99<br>(0.89 - 1.10) | 8.2x10 <sup>-01</sup> | 0.92<br>(0.75 - 1.12) | 4.0x10 <sup>-01</sup> | -                     | -                    | 1.03<br>(0.87 - 1.23) | 7.2x10 <sup>-01</sup> | 1.06<br>(0.90 - 1.25)  | 4.6x10 <sup>-01</sup> | 1.01<br>(0.73 - 1.38) | 9.6x10 <sup>-01</sup>  |
| rs752282   | T    | 1.01<br>(0.85 - 1.19) | 9.3x10 <sup>-01</sup> | 1.00<br>(0.69 - 1.44) | 1.0x10 <sup>-00</sup> | 0.87<br>(0.69 - 1.11) | 2.6x10 <sup>-01</sup> | 1.02<br>(0.89 - 1.16) | 8.2x10 <sup>-01</sup> | 1.19<br>(0.87 - 1.62) | 2.8x10 <sup>-01</sup> | -                     | -                    | -                     | -                     | 1.49<br>(0.17 - 13.18) | 7.2x10 <sup>-01</sup> | -                     | -                      |
| rs7682872  | G    | 0.97<br>(0.88 - 1.08) | 6.1x10 <sup>-01</sup> | 0.94<br>(0.76 - 1.19) | 6.4x10 <sup>-01</sup> | 0.96<br>(0.83 - 1.12) | 6.3x10 <sup>-01</sup> | 1.14<br>(1.04 - 1.23) | 4.0x10 <sup>-03</sup> | 1.11<br>(0.93 - 1.33) | 2.6x10 <sup>-01</sup> | -                     | -                    | 0.93<br>(0.80 - 1.09) | 4.0x10 <sup>-01</sup> | 0.92<br>(0.80 - 1.04)  | 1.9x10 <sup>-01</sup> | 0.79<br>(0.60 - 1.03) | 8.6x10 <sup>-02</sup>  |
| rs768347   | T    | 1.03<br>(0.90 - 1.17) | 6.8x10 <sup>-01</sup> | 0.91<br>(0.68 - 1.22) | 5.2x10 <sup>-01</sup> | 1.01<br>(0.84 - 1.21) | 9.2x10 <sup>-01</sup> | 1.00<br>(0.89 - 1.12) | 9.8x10 <sup>-01</sup> | 0.94<br>(0.76 - 1.18) | 6.1x10 <sup>-01</sup> | -                     | -                    | 1.01<br>(0.83 - 1.22) | 9.3x10 <sup>-01</sup> | 1.01<br>(0.86 - 1.19)  | 8.9x10 <sup>-01</sup> | 1.09<br>(0.78 - 1.51) | 6.2x10 <sup>-01</sup>  |
| rs7835679  | C    | 1.12<br>(0.92 - 1.39) | 2.6x10 <sup>-01</sup> | 0.93<br>(0.58 - 1.47) | 7.4x10 <sup>-01</sup> | 1.54<br>(1.11 - 2.08) | 9.0x10 <sup>-03</sup> | 1.00<br>(0.82 - 1.22) | 9.9x10 <sup>-01</sup> | 0.88<br>(0.63 - 1.25) | 4.9x10 <sup>-01</sup> | -                     | -                    | 1.23<br>(0.91 - 1.67) | 1.7x10 <sup>-01</sup> | 1.04<br>(0.79 - 1.37)  | 7.6x10 <sup>-01</sup> | 0.76<br>(0.48 - 1.22) | 2.6x10 <sup>-01</sup>  |
| rs7987944  | C    | 1.01<br>(0.92 - 1.12) | 8.0x10 <sup>-01</sup> | 1.19<br>(0.94 - 1.50) | 1.4x10 <sup>-01</sup> | 0.98<br>(0.84 - 1.13) | 7.6x10 <sup>-01</sup> | 1.03<br>(0.95 - 1.13) | 4.7x10 <sup>-01</sup> | 1.21<br>(1.01 - 1.45) | 4.2x10 <sup>-02</sup> | -                     | -                    | 0.99<br>(0.85 - 1.16) | 9.3x10 <sup>-01</sup> | 1.01<br>(0.88 - 1.16)  | 8.5x10 <sup>-01</sup> | 0.89<br>(0.67 - 1.17) | 4.0x10 <sup>-01</sup>  |
| rs9267992  | G    | 1.16<br>(1.01 - 1.33) | 3.7x10 <sup>-02</sup> | 0.91<br>(0.68 - 1.22) | 5.3x10 <sup>-01</sup> | 1.26<br>(1.04 - 1.53) | 1.8x10 <sup>-02</sup> | 0.99<br>(0.88 - 1.11) | 8.3x10 <sup>-01</sup> | 1.17<br>(0.91 - 1.51) | 2.3x10 <sup>-01</sup> | -                     | -                    | 0.92<br>(0.74 - 1.14) | 4.3x10 <sup>-01</sup> | 1.03<br>(0.87 - 1.22)  | 7.4x10 <sup>-01</sup> | 1.03<br>(0.71 - 1.47) | 8.9x10 <sup>-01</sup>  |
| rs9284844  | G    | 1.03<br>(0.90 - 1.18) | 6.6x10 <sup>-01</sup> | 1.08<br>(0.79 - 1.47) | 6.3x10 <sup>-01</sup> | 1.19<br>(0.98 - 1.45) | 7.3x10 <sup>-02</sup> | 1.08<br>(0.94 - 1.22) | 2.7x10 <sup>-01</sup> | 0.86<br>(0.68 - 1.11) | 2.5x10 <sup>-01</sup> | -                     | -                    | 0.83<br>(0.69 - 1.01) | 6.6x10 <sup>-02</sup> | 0.98<br>(0.83 - 1.18)  | 8.7x10 <sup>-01</sup> | 1.08<br>(0.74 - 1.56) | 7.0x10 <sup>-01</sup>  |

In Ottawa, we used rs3825214 as a proxy SNP for rs12415501 (r<sup>2</sup>=0.76). SNP – single nucleotide polymorphism; RR – relative risk; CI – confidence interval.



**Supplemental Table 4. Meta-analysis association results in Europeans.**

| SNP        | AF Risk Allele | Risk Allele Frequency | Original GWAS dataset <sup>1</sup> |                       | Direct genotyping  |                       | <i>In-silico</i> replication |                       | Combined replication |                       | Overall Meta-analysis |                       |
|------------|----------------|-----------------------|------------------------------------|-----------------------|--------------------|-----------------------|------------------------------|-----------------------|----------------------|-----------------------|-----------------------|-----------------------|
|            |                |                       | RR (95% CI)                        | <i>P</i> value        | RR (95% CI)        | <i>P</i> value        | RR (95% CI)                  | <i>P</i> value        | RR (95% CI)          | <i>P</i> value        | RR (95% CI)           | <i>P</i> value        |
| rs10137710 | T              | 0.16                  | 1.13 (1.08 - 1.19)                 | 1.8x10 <sup>-06</sup> | 1.06 (0.99 - 1.14) | 1.2x10 <sup>-01</sup> | 0.93 (0.82 - 1.06)           | 2.6x10 <sup>-01</sup> | 1.03 (0.96 - 1.09)   | 4.2x10 <sup>-01</sup> | 1.09 (1.05 - 1.13)    | 2.9x10 <sup>-05</sup> |
| rs10212121 | A              | 0.67                  | 1.10 (1.05 - 1.14)                 | 1.8x10 <sup>-05</sup> | 1.03 (0.97 - 1.09) | 3.3x10 <sup>-01</sup> | 1.02 (0.93 - 1.12)           | 7.1x10 <sup>-01</sup> | 1.03 (0.98 - 1.08)   | 3.0x10 <sup>-01</sup> | 1.06 (1.03 - 1.10)    | 9.9x10 <sup>-05</sup> |
| rs10267684 | T              | 0.31                  | 1.10 (1.06 - 1.15)                 | 4.1x10 <sup>-06</sup> | 1.04 (0.98 - 1.10) | 2.4x10 <sup>-01</sup> | 1.01 (0.91 - 1.11)           | 8.7x10 <sup>-01</sup> | 1.03 (0.98 - 1.08)   | 2.7x10 <sup>-01</sup> | 1.07 (1.04 - 1.11)    | 2.2x10 <sup>-05</sup> |
| rs10507248 | T              | 0.73                  | 1.13 (1.08 - 1.18)                 | 8.5x10 <sup>-08</sup> | 1.14 (1.06 - 1.20) | 4.0x10 <sup>-05</sup> | 1.03 (0.93 - 1.14)           | 5.9x10 <sup>-01</sup> | 1.11 (1.05 - 1.17)   | 1.3x10 <sup>-04</sup> | 1.12 (1.08 - 1.16)    | 5.7x10 <sup>-11</sup> |
| rs10762941 | A              | 0.40                  | 1.09 (1.04 - 1.13)                 | 3.9x10 <sup>-05</sup> | 1.00 (0.95 - 1.05) | 9.8x10 <sup>-01</sup> | 0.99 (0.90 - 1.09)           | 8.5x10 <sup>-01</sup> | 1.00 (0.95 - 1.05)   | 9.1x10 <sup>-01</sup> | 1.05 (1.02 - 1.08)    | 2.2x10 <sup>-03</sup> |
| rs10800507 | C              | 0.50                  | 1.11 (1.06 - 1.15)                 | 8.8x10 <sup>-07</sup> | 1.10 (1.03 - 1.15) | 1.2x10 <sup>-03</sup> | 0.98 (0.90 - 1.08)           | 7.4x10 <sup>-01</sup> | 1.06 (1.02 - 1.12)   | 8.7x10 <sup>-03</sup> | 1.09 (1.05 - 1.12)    | 5.7x10 <sup>-08</sup> |
| rs10849152 | T              | 0.55                  | 1.09 (1.04 - 1.13)                 | 4.9x10 <sup>-05</sup> | 0.99 (0.94 - 1.05) | 7.9x10 <sup>-01</sup> | 1.05 (0.95 - 1.15)           | 3.3x10 <sup>-01</sup> | 1.01 (0.96 - 1.05)   | 8.0x10 <sup>-01</sup> | 1.05 (1.02 - 1.09)    | 1.2x10 <sup>-03</sup> |
| rs10919369 | T              | 0.22                  | 1.12 (1.07 - 1.17)                 | 2.6x10 <sup>-06</sup> | 1.07 (1.01 - 1.14) | 2.8x10 <sup>-02</sup> | 1.02 (0.91 - 1.14)           | 7.2x10 <sup>-01</sup> | 1.06 (1.00 - 1.12)   | 3.6x10 <sup>-02</sup> | 1.09 (1.06 - 1.13)    | 8.9x10 <sup>-07</sup> |
| rs10947261 | G              | 0.92                  | 1.18 (1.09 - 1.27)                 | 2.7x10 <sup>-05</sup> | 1.11 (1.01 - 1.22) | 3.0x10 <sup>-02</sup> | 0.93 (0.78 - 1.10)           | 3.8x10 <sup>-01</sup> | 1.06 (0.98 - 1.16)   | 1.4x10 <sup>-01</sup> | 1.12 (1.06 - 1.19)    | 3.8x10 <sup>-05</sup> |
| rs11466656 | C              | 0.01                  | 7.25 (3.14 - 16.78)                | 3.6x10 <sup>-06</sup> | -                  | -                     | 1.29 (0.02 - 72.45)          | 9.0x10 <sup>-01</sup> | 1.29 (0.02 - 72.45)  | 9.0x10 <sup>-01</sup> | 6.75 (2.97 - 15.34)   | 5.1x10 <sup>-06</sup> |
| rs12370365 | G              | 0.77                  | 1.10 (1.05 - 1.15)                 | 4.4x10 <sup>-05</sup> | 1.11 (1.04 - 1.18) | 1.9x10 <sup>-03</sup> | 1.05 (0.93 - 1.18)           | 4.0x10 <sup>-01</sup> | 1.09 (1.03 - 1.15)   | 1.8x10 <sup>-03</sup> | 1.10 (1.06 - 1.14)    | 2.8x10 <sup>-07</sup> |
| rs12406668 | T              | 0.08                  | 1.16 (1.08 - 1.24)                 | 4.9x10 <sup>-05</sup> | 1.03 (0.93 - 1.14) | 6.0x10 <sup>-01</sup> | 0.93 (0.78 - 1.11)           | 4.0x10 <sup>-01</sup> | 1.00 (0.92 - 1.09)   | 9.7x10 <sup>-01</sup> | 1.09 (1.04 - 1.15)    | 1.3x10 <sup>-03</sup> |
| rs12415501 | T              | 0.16                  | 1.15 (1.10 - 1.22)                 | 9.0x10 <sup>-08</sup> | 1.27 (1.18 - 1.37) | 6.5x10 <sup>-10</sup> | 1.17 (1.03 - 1.33)           | 1.4x10 <sup>-02</sup> | 1.22 (1.14 - 1.29)   | 6.0x10 <sup>-10</sup> | 1.18 (1.14 - 1.23)    | 6.5x10 <sup>-16</sup> |
| rs12733930 | C              | 0.78                  | 1.11 (1.06 - 1.16)                 | 3.2x10 <sup>-05</sup> | 1.01 (0.94 - 1.08) | 7.6x10 <sup>-01</sup> | 1.00 (0.89 - 1.11)           | 9.8x10 <sup>-01</sup> | 1.01 (0.95 - 1.06)   | 8.1x10 <sup>-01</sup> | 1.06 (1.03 - 1.10)    | 8.2x10 <sup>-04</sup> |
| rs12991989 | C              | 0.51                  | 1.10 (1.06 - 1.15)                 | 1.5x10 <sup>-06</sup> | 1.01 (0.94 - 1.06) | 7.5x10 <sup>-01</sup> | 1.02 (0.93 - 1.12)           | 6.8x10 <sup>-01</sup> | 1.01 (0.96 - 1.06)   | 6.3x10 <sup>-01</sup> | 1.06 (1.03 - 1.10)    | 7.7x10 <sup>-05</sup> |
| rs13169864 | G              | 0.82                  | 1.13 (1.06 - 1.19)                 | 4.5x10 <sup>-05</sup> | 1.01 (0.94 - 1.08) | 7.8x10 <sup>-01</sup> | 1.19 (1.04 - 1.35)           | 1.2x10 <sup>-02</sup> | 1.04 (0.98 - 1.10)   | 1.7x10 <sup>-01</sup> | 1.09 (1.04 - 1.12)    | 1.1x10 <sup>-04</sup> |
| rs13216675 | T              | 0.69                  | 1.10 (1.05 - 1.15)                 | 5.0x10 <sup>-05</sup> | 1.10 (1.03 - 1.16) | 1.7x10 <sup>-03</sup> | 1.12 (1.02 - 1.25)           | 2.2x10 <sup>-02</sup> | 1.10 (1.05 - 1.16)   | 1.1x10 <sup>-04</sup> | 1.10 (1.06 - 1.14)    | 2.2x10 <sup>-08</sup> |
| rs1324739  | G              | 0.04                  | 1.40 (1.22 - 1.61)                 | 1.6x10 <sup>-06</sup> | 1.14 (0.97 - 1.35) | 1.2x10 <sup>-01</sup> | 0.72 (0.52 - 0.99)           | 4.2x10 <sup>-02</sup> | 1.03 (0.89 - 1.20)   | 6.5x10 <sup>-01</sup> | 1.22 (1.10 - 1.35)    | 1.4x10 <sup>-04</sup> |
| rs13396611 | T              | 0.04                  | 1.27 (1.14 - 1.42)                 | 1.2x10 <sup>-05</sup> | 0.95 (0.82 - 1.10) | 5.3x10 <sup>-01</sup> | 1.03 (0.79 - 1.34)           | 8.5x10 <sup>-01</sup> | 0.97 (0.85 - 1.10)   | 6.4x10 <sup>-01</sup> | 1.14 (1.05 - 1.23)    | 2.3x10 <sup>-03</sup> |
| rs2118254  | C              | 0.42                  | 1.09 (1.04 - 1.13)                 | 3.5x10 <sup>-05</sup> | 1.03 (0.98 - 1.08) | 2.9x10 <sup>-01</sup> | 1.02 (0.93 - 1.12)           | 6.8x10 <sup>-01</sup> | 1.03 (0.98 - 1.07)   | 2.6x10 <sup>-01</sup> | 1.06 (1.03 - 1.09)    | 1.2x10 <sup>-04</sup> |
| rs2204224  | T              | 0.71                  | 1.19 (1.09 - 1.29)                 | 3.6x10 <sup>-05</sup> | -                  | -                     | 1.03 (0.88 - 1.20)           | 6.8x10 <sup>-01</sup> | 1.03 (0.88 - 1.20)   | 6.8x10 <sup>-01</sup> | 1.15 (1.08 - 1.23)    | 1.3x10 <sup>-04</sup> |
| rs2249965  | A              | 0.36                  | 1.11 (1.07 - 1.16)                 | 5.7x10 <sup>-07</sup> | 0.99 (0.94 - 1.05) | 7.2x10 <sup>-01</sup> | 1.04 (0.94 - 1.15)           | 4.2x10 <sup>-01</sup> | 1.00 (0.95 - 1.05)   | 9.3x10 <sup>-01</sup> | 1.06 (1.03 - 1.10)    | 1.2x10 <sup>-04</sup> |
| rs2305398  | G              | 0.60                  | 1.10 (1.05 - 1.16)                 | 4.2x10 <sup>-06</sup> | 1.08 (10.2 - 1.14) | 5.7x10 <sup>-03</sup> | 1.01 (0.92 - 1.10)           | 9.1x10 <sup>-01</sup> | 1.06 (1.01 - 1.11)   | 1.5x10 <sup>-02</sup> | 1.09 (1.05 - 1.12)    | 3.9x10 <sup>-07</sup> |
| rs2358891  | G              | 0.74                  | 1.11 (1.06 - 1.16)                 | 1.5x10 <sup>-05</sup> | -                  | -                     | 1.11 (1.00 - 1.23)           | 5.3x10 <sup>-02</sup> | 1.11 (1.00 - 1.23)   | 5.3x10 <sup>-02</sup> | 1.11 (1.06 - 1.16)    | 2.0x10 <sup>-06</sup> |
| rs2532144  | T              | 0.51                  | 1.10 (1.05 - 1.14)                 | 3.0x10 <sup>-05</sup> | 1.06 (1.00 - 1.14) | 3.9x10 <sup>-02</sup> | 0.97 (0.89 - 1.08)           | 5.9x10 <sup>-01</sup> | 1.04 (0.99 - 1.10)   | 1.4x10 <sup>-01</sup> | 1.08 (1.04 - 1.11)    | 3.4x10 <sup>-05</sup> |
| rs2685217  | T              | 0.24                  | 1.11 (1.06 - 1.17)                 | 2.6x10 <sup>-05</sup> | 1.00 (0.94 - 1.06) | 8.8x10 <sup>-01</sup> | 1.05 (0.94 - 1.17)           | 3.8x10 <sup>-01</sup> | 1.01 (0.96 - 1.06)   | 7.7x10 <sup>-01</sup> | 1.06 (1.03 - 1.10)    | 9.3x10 <sup>-04</sup> |
| rs2723065  | A              | 0.60                  | 1.10 (1.06 - 1.15)                 | 9.7x10 <sup>-07</sup> | 1.05 (0.99 - 1.11) | 9.7x10 <sup>-02</sup> | 1.11 (1.01 - 1.22)           | 3.3x10 <sup>-02</sup> | 1.06 (1.01 - 1.11)   | 1.2x10 <sup>-02</sup> | 1.09 (1.05 - 1.12)    | 7.6x10 <sup>-08</sup> |
| rs276857   | G              | 0.13                  | 1.16 (1.08 - 1.23)                 | 1.0x10 <sup>-05</sup> | 1.07 (0.99 - 1.16) | 7.5x10 <sup>-02</sup> | 1.04 (0.90 - 1.21)           | 5.9x10 <sup>-01</sup> | 1.07 (1.00 - 1.14)   | 6.7x10 <sup>-02</sup> | 1.11 (1.06 - 1.17)    | 7.5x10 <sup>-06</sup> |
| rs3780190  | G              | 0.54                  | 1.11 (1.06 - 1.15)                 | 6.3x10 <sup>-06</sup> | 1.05 (1.00 - 1.11) | 6.0x10 <sup>-02</sup> | 1.06 (0.97 - 1.16)           | 1.8x10 <sup>-01</sup> | 1.05 (1.01 - 1.11)   | 2.1x10 <sup>-02</sup> | 1.09 (1.05 - 1.11)    | 1.1x10 <sup>-06</sup> |
| rs3922843  | A              | 0.26                  | 1.10 (1.06 - 1.15)                 | 9.7x10 <sup>-06</sup> | 1.06 (1.00 - 1.12) | 6.5x10 <sup>-02</sup> | 1.07 (0.96 - 1.18)           | 2.2x10 <sup>-01</sup> | 1.06 (1.01 - 1.12)   | 2.7x10 <sup>-02</sup> | 1.09 (1.05 - 1.12)    | 1.5x10 <sup>-06</sup> |
| rs4238314  | A              | 0.50                  | 1.09 (1.05 - 1.13)                 | 2.7x10 <sup>-05</sup> | 1.03 (0.98 - 1.09) | 2.3x10 <sup>-01</sup> | 0.97 (0.89 - 1.07)           | 5.9x10 <sup>-01</sup> | 1.02 (0.97 - 1.07)   | 4.3x10 <sup>-01</sup> | 1.06 (1.03 - 1.09)    | 2.2x10 <sup>-04</sup> |
| rs4642101  | G              | 0.65                  | 1.11 (1.06 - 1.15)                 | 4.2x10 <sup>-06</sup> | 1.12 (1.05 - 1.19) | 3.9x10 <sup>-04</sup> | 0.98 (0.88 - 1.08)           | 6.2x10 <sup>-01</sup> | 1.09 (1.04 - 1.15)   | 5.6x10 <sup>-04</sup> | 1.10 (1.06 - 1.14)    | 9.8x10 <sup>-09</sup> |
| rs4824051  | C              | 0.75                  | 1.11 (1.06 - 1.16)                 | 4.6x10 <sup>-05</sup> | 1.05 (0.99 - 1.12) | 1.1x10 <sup>-01</sup> | 1.06 (0.94 - 1.19)           | 3.2x10 <sup>-01</sup> | 1.05 (1.00 - 1.11)   | 6.0x10 <sup>-02</sup> | 1.09 (1.04 - 1.12)    | 1.8x10 <sup>-05</sup> |

**Supplemental Table 4. Meta-analysis association results in Europeans.**

| SNP       | AF Risk Allele | Risk Allele Frequency | Original GWAS dataset <sup>1</sup> |                       | Direct genotyping  |                       | <i>In-silico</i> replication |                       | Combined replication |                       | Overall Meta-analysis |                       |
|-----------|----------------|-----------------------|------------------------------------|-----------------------|--------------------|-----------------------|------------------------------|-----------------------|----------------------|-----------------------|-----------------------|-----------------------|
|           |                |                       | RR (95% CI)                        | <i>P</i> value        | RR (95% CI)        | <i>P</i> value        | RR (95% CI)                  | <i>P</i> value        | RR (95% CI)          | <i>P</i> value        | RR (95% CI)           | <i>P</i> value        |
| rs6062468 | C              | 0.51                  | 1.10 (1.05 - 1.15)                 | 4.7x10 <sup>-05</sup> | 1.00 (0.95 - 1.05) | 9.3x10 <sup>-01</sup> | 1.09 (0.99 - 1.20)           | 7.1x10 <sup>-02</sup> | 1.02 (0.97 - 1.07)   | 4.2x10 <sup>-01</sup> | 1.06 (1.03 - 1.09)    | 4.9x10 <sup>-04</sup> |
| rs6540690 | C              | 0.76                  | 1.12 (1.06 - 1.18)                 | 3.6x10 <sup>-05</sup> | 1.01 (0.95 - 1.08) | 7.2x10 <sup>-01</sup> | 0.92 (0.82 - 1.03)           | 1.3x10 <sup>-01</sup> | 0.99 (0.93 - 1.04)   | 6.7x10 <sup>-01</sup> | 1.05 (1.01 - 1.10)    | 6.9x10 <sup>-03</sup> |
| rs6749773 | A              | 0.47                  | 1.08 (1.04 - 1.13)                 | 4.9x10 <sup>-05</sup> | 0.98 (0.93 - 1.03) | 4.8x10 <sup>-01</sup> | 1.06 (0.97 - 1.17)           | 1.8x10 <sup>-01</sup> | 1.00 (0.96 - 1.05)   | 9.5x10 <sup>-01</sup> | 1.05 (1.02 - 1.08)    | 1.7x10 <sup>-03</sup> |
| rs6882776 | A              | 0.71                  | 1.10 (1.05 - 1.16)                 | 3.7x10 <sup>-05</sup> | 1.10 (1.04 - 1.16) | 1.4x10 <sup>-03</sup> | 1.00 (0.90 - 1.10)           | 9.6x10 <sup>-01</sup> | 1.08 (1.02 - 1.12)   | 6.2x10 <sup>-03</sup> | 1.09 (1.05 - 1.12)    | 1.0x10 <sup>-06</sup> |
| rs6884185 | C              | 0.54                  | 1.10 (1.05 - 1.15)                 | 4.5x10 <sup>-05</sup> | 1.03 (0.98 - 1.10) | 2.0x10 <sup>-01</sup> | 1.02 (0.92 - 1.14)           | 6.6x10 <sup>-01</sup> | 1.03 (0.97 - 1.09)   | 1.8x10 <sup>-01</sup> | 1.06 (1.03 - 1.10)    | 8.9x10 <sup>-05</sup> |
| rs6968408 | C              | 0.91                  | 1.16 (1.09 - 1.25)                 | 1.8x10 <sup>-05</sup> | 1.00 (0.91 - 1.09) | 9.3x10 <sup>-01</sup> | 0.82 (0.70 - 0.95)           | 9.9x10 <sup>-03</sup> | 0.95 (0.88 - 1.02)   | 1.7x10 <sup>-01</sup> | 1.06 (1.01 - 1.11)    | 2.5x10 <sup>-02</sup> |
| rs7160770 | T              | 0.50                  | 1.09 (1.04 - 1.13)                 | 5.0x10 <sup>-05</sup> | 0.96 (0.91 - 1.01) | 1.6x10 <sup>-01</sup> | 1.09 (0.99 - 1.19)           | 7.9x10 <sup>-02</sup> | 0.99 (0.94 - 1.04)   | 7.3x10 <sup>-01</sup> | 1.04 (1.01 - 1.08)    | 4.4x10 <sup>-03</sup> |
| rs7295704 | T              | 0.21                  | 1.10 (1.05 - 1.16)                 | 4.9x10 <sup>-05</sup> | 1.04 (0.97 - 1.11) | 2.9x10 <sup>-01</sup> | 1.04 (0.93 - 1.17)           | 4.5x10 <sup>-01</sup> | 1.04 (0.98 - 1.10)   | 2.0x10 <sup>-01</sup> | 1.08 (1.04 - 1.12)    | 7.7x10 <sup>-05</sup> |
| rs752282  | T              | 0.02                  | 2.91 (1.82 - 4.63)                 | 7.5x10 <sup>-06</sup> | 1.00 (0.92 - 1.10) | 9.3x10 <sup>-01</sup> | 1.77 (0.22 - 14.2)           | 5.9x10 <sup>-01</sup> | 1.01 (0.92 - 1.10)   | 9.1x10 <sup>-01</sup> | 1.04 (0.96 - 1.14)    | 3.4x10 <sup>-01</sup> |
| rs7682872 | G              | 0.61                  | 1.09 (1.05 - 1.14)                 | 2.8x10 <sup>-05</sup> | 1.04 (0.99 - 1.10) | 1.0x10 <sup>-01</sup> | 0.91 (0.82 - 1.00)           | 4.0x10 <sup>-02</sup> | 1.01 (0.96 - 1.06)   | 7.0x10 <sup>-01</sup> | 1.05 (1.02 - 1.09)    | 6.1x10 <sup>-04</sup> |
| rs768347  | T              | 0.19                  | 1.11 (1.06 - 1.17)                 | 1.4x10 <sup>-05</sup> | 1.00 (0.93 - 1.07) | 9.5x10 <sup>-01</sup> | 1.02 (0.91 - 1.15)           | 7.5x10 <sup>-01</sup> | 1.00 (0.94 - 1.07)   | 9.1x10 <sup>-01</sup> | 1.07 (1.03 - 1.11)    | 5.3x10 <sup>-04</sup> |
| rs7835679 | C              | 0.93                  | 1.20 (1.10 - 1.30)                 | 2.2x10 <sup>-05</sup> | 1.08 (0.96 - 1.01) | 2.1x10 <sup>-01</sup> | 1.06 (0.88 - 1.28)           | 5.4x10 <sup>-01</sup> | 1.08 (0.97 - 1.19)   | 1.7x10 <sup>-01</sup> | 1.15 (1.08 - 1.22)    | 3.4x10 <sup>-05</sup> |
| rs7987944 | C              | 0.34                  | 1.09 (1.05 - 1.14)                 | 4.9x10 <sup>-05</sup> | 1.04 (0.99 - 1.10) | 1.4x10 <sup>-01</sup> | 0.99 (0.90 - 1.09)           | 8.3x10 <sup>-01</sup> | 1.03 (0.98 - 1.08)   | 2.5x10 <sup>-01</sup> | 1.06 (1.03 - 1.10)    | 1.2x10 <sup>-04</sup> |
| rs9267992 | G              | 0.15                  | 1.12 (1.06 - 1.18)                 | 4.0x10 <sup>-05</sup> | 1.08 (1.00 - 1.17) | 3.7x10 <sup>-02</sup> | 0.99 (0.87 - 1.12)           | 8.7x10 <sup>-01</sup> | 1.06 (0.99 - 1.13)   | 8.7x10 <sup>-02</sup> | 1.09 (1.05 - 1.14)    | 2.1x10 <sup>-05</sup> |
| rs9284844 | G              | 0.84                  | 1.12 (1.06 - 1.18)                 | 2.7x10 <sup>-05</sup> | 1.05 (0.98 - 1.14) | 1.7x10 <sup>-01</sup> | 0.93 (0.82 - 1.05)           | 2.4x10 <sup>-01</sup> | 1.02 (0.95 - 1.09)   | 5.9x10 <sup>-01</sup> | 1.08 (1.03 - 1.12)    | 3.2x10 <sup>-04</sup> |
| rs9857326 | A              | 0.23                  | 1.09 (1.05 - 1.14)                 | 3.9x10 <sup>-05</sup> | 0.99 (0.94 - 1.05) | 7.9x10 <sup>-01</sup> | 1.01 (0.91 - 1.11)           | 9.0x10 <sup>-01</sup> | 1.00 (0.95 - 1.05)   | 8.7x10 <sup>-01</sup> | 1.05 (1.02 - 1.08)    | 2.3x10 <sup>-03</sup> |

In Ottawa, we used rs3825214 as a proxy SNP for rs12415501 (r<sup>2</sup>=0.76). SNP – single nucleotide polymorphism; RR – relative risk; CI – confidence interval.

**Supplemental Table 5. Six genome-wide significant AF loci in Japanese.**

| SNP        | Chr   | AF Risk Allele | Closest gene  | Relative location | Original GWAS <sup>1</sup> Stage 1 |                        | Replication Stage 2 |                       | Meta-analysis Stages 1-3 |                         |
|------------|-------|----------------|---------------|-------------------|------------------------------------|------------------------|---------------------|-----------------------|--------------------------|-------------------------|
|            |       |                |               |                   | RR<br>95% CI                       | <i>P value</i>         | RR<br>95% CI        | <i>P value</i>        | RR<br>95% CI             | <i>P value</i>          |
| rs639652   | 1q24  | G              | <i>PRRX1</i>  | Intronic          | 1.21<br>1.08-1.35                  | 6.6x10 <sup>-4</sup>   | 1.21<br>1.13-1.30   | 3.2x10 <sup>-7</sup>  | 1.18<br>1.12-1.21        | 2.7x10 <sup>-15</sup>   |
| rs1906599  | 4q25  | T              | <i>PITX2</i>  | Intergenic        | 1.75<br>1.54-1.98                  | 9.0 x10 <sup>-18</sup> | 2.05<br>1.87-2.25   | 1.9x10 <sup>-54</sup> | 1.78<br>1.71-1.86        | 6.9 x10 <sup>-151</sup> |
| rs6466579  | 7q31  | C              | <i>CAV1/2</i> | Intronic          | 1.24<br>1.09-1.40                  | 7.6 x10 <sup>-4</sup>  | 1.23<br>1.13-1.34   | 2.5x10 <sup>-6</sup>  | 1.16<br>1.11-1.21        | 7.8 x10 <sup>-12</sup>  |
| rs6584555  | 10q25 | C              | <i>NEURL</i>  | Intronic          | 1.33<br>1.14-1.55                  | 2.8x10 <sup>-4</sup>   | 1.36<br>1.23-1.50   | 3.3x10 <sup>-9</sup>  | 1.32<br>1.26-1.39        | 2.0x10 <sup>-25</sup>   |
| rs6490029  | 12q24 | A              | <i>CUX2</i>   | Intronic          | 1.22<br>1.09-1.37                  | 6.3x10 <sup>-4</sup>   | 1.11<br>1.12-1.30   | 2.6x10 <sup>-6</sup>  | 1.12<br>1.08-1.16        | 3.9x10 <sup>-9</sup>    |
| rs12932445 | 16q22 | C              | <i>ZFHX3</i>  | Intronic          | 1.26<br>1.13-1.40                  | 3.1 x10 <sup>-5</sup>  | 1.38<br>1.28-1.49   | 1.8x10 <sup>-17</sup> | 1.26<br>1.22-1.31        | 4.4 x10 <sup>-34</sup>  |

SNP – single nucleotide polymorphism; AF – atrial fibrillation; Chr – chromosome; RR – relative risk; CI – confidence interval.

| Supplemental Table 6. Fine mapping of the <i>NEURL</i> locus in Japanese |                |                      |                        |                   |                      |                   |                       |
|--------------------------------------------------------------------------|----------------|----------------------|------------------------|-------------------|----------------------|-------------------|-----------------------|
| SNP                                                                      | AF Risk Allele | $r^2$ with rs6584555 | D Prime with rs6584555 | First stage       |                      | Confirmation      |                       |
|                                                                          |                |                      |                        | OR 95% CI         | <i>P</i> value       | OR 95% CI         | <i>P</i> value        |
| rs6584555                                                                | C              | –                    | –                      | 1.27<br>1.07-1.52 | $7.2 \times 10^{-3}$ | 1.34<br>1.24-1.45 | $3.1 \times 10^{-14}$ |
| rs117577689                                                              | T              | 0.01                 | 0.99                   | 1.00<br>0.75-1.35 | $9.9 \times 10^{-1}$ |                   |                       |
| rs141902653                                                              | C              | <0.01                | 1.00                   | 1.18<br>0.73-1.91 | $5.0 \times 10^{-1}$ |                   |                       |
| rs180924020                                                              | G              | <0.01                | 0.14                   | 1.04<br>0.56-1.93 | $9.1 \times 10^{-1}$ |                   |                       |
| rs75733446                                                               | A              | <0.01                | 0.79                   | 1.46<br>0.95-2.25 | $8.9 \times 10^{-2}$ |                   |                       |
| rs80065416                                                               | T              | 0.49                 | 1.00                   | 1.55<br>1.23-1.97 | $1.8 \times 10^{-4}$ | 1.65<br>1.48-1.84 | $3.1 \times 10^{-19}$ |
| rs2208322                                                                | G              | 0.39                 | 1.00                   | 1.09<br>0.95-1.24 | $2.3 \times 10^{-1}$ |                   |                       |
| rs72848976                                                               | A              | 0.01                 | 1.00                   | 1.01<br>0.85-1.20 | $9.0 \times 10^{-1}$ |                   |                       |
| rs6584558                                                                | A              | 0.18                 | 0.62                   | 1.17<br>1.02-1.34 | $3.2 \times 10^{-2}$ |                   |                       |
| rs74154533                                                               | A              | 0.65                 | 1.00                   | 1.46<br>1.20-1.78 | $1.3 \times 10^{-4}$ | 1.51<br>1.39-1.65 | $1.6 \times 10^{-20}$ |

Linkage disequilibrium reported as  $r^2$  and DPrime relative to the Sentinel SNP rs658455, determined based on the HapMap CHB+JPT panel.

**Supplemental Table 7. Comparison of AF association results between individuals of European and Japanese ancestry**

| SNP        | Chr   | AF risk allele | Closest gene | European ancestry |                       |                       | Japanese ancestry |                     |                       |
|------------|-------|----------------|--------------|-------------------|-----------------------|-----------------------|-------------------|---------------------|-----------------------|
|            |       |                |              | RAF               | RR (95% CI)           | p                     | RAF               | RR (95% CI)         | p                     |
| rs10507248 | 12q24 | T              | <i>TBX5</i>  | 0.73              | 1.12<br>(1.08 - 1.16) | 5.7x10 <sup>-11</sup> | 0.44              | 1.16<br>(1.10-1.22) | 2.7x10 <sup>-8†</sup> |
| rs4642101  | 3p25  | G              | <i>CAND2</i> | 0.65              | 1.10<br>(1.06 - 1.14) | 9.8x10 <sup>-9</sup>  | 0.31              | 1.08<br>(1.02-1.14) | 9.1x10 <sup>-3†</sup> |
| rs13216675 | 6q22  | T              | <i>GJA1</i>  | 0.69              | 1.10<br>(1.06 - 1.14) | 2.2x10 <sup>-8</sup>  | 0.70              | 1.11<br>(1.05-1.17) | 3.2x10 <sup>-4†</sup> |
| rs6490029  | 12q24 | A              | <i>CUX2</i>  | 0.22              | 1.02<br>(0.97-1.07)   | 0.412*                | 0.64              | 1.12<br>(1.08-1.16) | 3.9x10 <sup>-9</sup>  |

**Abbreviations:** SNP, single nucleotide polymorphism; RAF, risk allele frequency; RR, relative risk; CI, confidence intervals.

†The results for *TBX5*/rs10507248, *CAND2*/rs4642101, and *GJA1*/rs13216675 were obtained by directly genotyping these SNPs in the Japanese samples in a total of 8,220 AF cases and 4,657 controls.

\*The results for *CUX2*/rs6490029 in Europeans was obtained from Ellinor et al.<sup>1</sup>

**Supplemental Table 8. eQTL analyses using the Genotype-Tissue Expression Portal (GTEx) and Cleveland Clinic Atrial Tissue Bank.**

**Europeans**

| Sentinel SNP | AF Risk Allele | Proxy SNP  | Distance from Sentinel SNP (bp) | r2   | DPrime | eQTL Yes/No | Tissue    | Gene | fold change per AF risk allele | Direction of expression change | P value                |
|--------------|----------------|------------|---------------------------------|------|--------|-------------|-----------|------|--------------------------------|--------------------------------|------------------------|
| rs10137710   | T              | rs10137710 | 0                               | 1    | 1      | No          |           |      |                                |                                |                        |
| rs10212121   | A              | rs10212121 | 0                               | 1    | 1      | No          |           |      |                                |                                |                        |
| rs10267684   | T              | rs10267684 | 0                               | 1    | 1      | No          |           |      |                                |                                |                        |
| rs10507248   | T              | rs10507248 | 0                               | 1    | 1      | Yes         | Heart, LA | TBX5 | 1.10 (1.05-1.15)               | increase                       | 2.14x10 <sup>-04</sup> |
|              | G              | rs7955405  | 213                             | 1    | 1      | Yes         | Heart, LA | TBX5 | 1.10 (1.05-1.15)               | increase                       | 2.14x10 <sup>-04</sup> |
|              | A              | rs7312625  | 2881                            | 1    | 1      | Yes         | Heart, LA | TBX5 | 1.11 (1.06-1.16)               | increase                       | 3.93x10 <sup>-05</sup> |
|              | G              | rs4767237  | 3720                            | 0.96 | 1      | Yes         | Heart, LA | TBX5 | 1.12 (1.08-1.18)               | increase                       | 1.47x10 <sup>-05</sup> |
|              | A              | rs883079   | 3853                            | 0.92 | 1      | Yes         | Heart, LA | TBX5 | 1.10 (1.06-1.15)               | increase                       | 9.37x10 <sup>-05</sup> |
|              | A              | rs7135659  | 4679                            | 0.92 | 1      | Yes         | Heart, LA | TBX5 | 1.11 (1.06-1.16)               | increase                       | 9.12x10 <sup>-05</sup> |
|              | T              | rs1946293  | 5667                            | 0.92 | 1      | Yes         | Heart, LA | TBX5 | 1.11 (1.06-1.16)               | increase                       | 9.04x10 <sup>-05</sup> |
|              | C              | rs3825215  | 7805                            | 0.92 | 1      | Yes         | Heart, LA | TBX5 | 1.12 (1.08-1.18)               | increase                       | 1.41x10 <sup>-05</sup> |
|              | C              | rs1895583  | 9792                            | 0.92 | 1      | Yes         | Heart, LA | TBX5 | 1.12 (1.08-1.18)               | increase                       | 2.26x10 <sup>-05</sup> |
|              | C              | rs1895585  | 5045                            | 0.87 | 0.96   | Yes         | Heart, LA | TBX5 | 1.12 (1.08-1.18)               | increase                       | 1.46x10 <sup>-05</sup> |
|              | C              | rs1946295  | 5268                            | 0.87 | 0.96   | Yes         | Heart, LA | TBX5 | 1.12 (1.08-1.18)               | increase                       | 1.36x10 <sup>-05</sup> |
|              |                | rs10850315 | 30358                           | 0.83 | 0.91   | No          |           |      |                                |                                |                        |
|              | T              | rs1895582  | 9942                            | 0.8  | 0.91   | Yes         | Heart, LA | TBX5 | 1.12 (1.08-1.18)               | increase                       | 1.74x10 <sup>-05</sup> |
|              |                | rs10744823 | 989                             | 0.76 | 1      | No          |           |      |                                |                                |                        |
|              |                | rs3825214  | 1650                            | 0.76 | 1      | No          |           |      |                                |                                |                        |
|              |                | rs10744824 | 11545                           | 0.76 | 1      | No          |           |      |                                |                                |                        |
|              |                | rs5015007  | 7990                            | 0.72 | 1      | No          |           |      |                                |                                |                        |
|              |                | rs1895597  | 6209                            | 0.72 | 0.95   | No          |           |      |                                |                                |                        |
|              |                | rs7964303  | 17193                           | 0.68 | 0.82   | No          |           |      |                                |                                |                        |
|              |                | rs12367410 | 405                             | 0.67 | 0.9    | No          |           |      |                                |                                |                        |
|              |                | rs7977083  | 6593                            | 0.67 | 0.9    | No          |           |      |                                |                                |                        |
|              |                | rs7308120  | 8047                            | 0.67 | 0.9    | No          |           |      |                                |                                |                        |
|              |                | rs4767239  | 19455                           | 0.64 | 0.94   | No          |           |      |                                |                                |                        |
|              |                | rs7964836  | 30373                           | 0.64 | 0.94   | No          |           |      |                                |                                |                        |
|              |                | rs1862909  | 9988                            | 0.64 | 0.94   | No          |           |      |                                |                                |                        |
|              |                | rs2891503  | 7283                            | 0.64 | 0.85   | No          |           |      |                                |                                |                        |
|              |                | rs1895596  | 5565                            | 0.62 | 1      | No          |           |      |                                |                                |                        |
|              |                | rs7309910  | 10839                           | 0.62 | 1      | No          |           |      |                                |                                |                        |
|              |                | rs6489955  | 11814                           | 0.62 | 1      | No          |           |      |                                |                                |                        |
|              |                | rs6489953  | 32331                           | 0.61 | 0.94   | No          |           |      |                                |                                |                        |
|              |                | rs6489956  | 4857                            | 0.6  | 0.89   | No          |           |      |                                |                                |                        |
|              |                | rs7316919  | 5638                            | 0.6  | 0.89   | No          |           |      |                                |                                |                        |
|              |                | rs2384409  | 7615                            | 0.6  | 0.89   | No          |           |      |                                |                                |                        |
|              |                | rs1895587  | 27564                           | 0.57 | 0.94   | No          |           |      |                                |                                |                        |
|              |                | rs10774752 | 28781                           | 0.57 | 0.94   | No          |           |      |                                |                                |                        |
|              |                | rs10744820 | 28966                           | 0.57 | 0.94   | No          |           |      |                                |                                |                        |
|              |                | rs10744819 | 35263                           | 0.57 | 0.94   | No          |           |      |                                |                                |                        |
|              |                | rs8181627  | 35329                           | 0.57 | 0.94   | No          |           |      |                                |                                |                        |
|              |                | rs8181683  | 35375                           | 0.57 | 0.94   | No          |           |      |                                |                                |                        |
|              |                | rs10744818 | 35408                           | 0.57 | 0.94   | No          |           |      |                                |                                |                        |
|              |                | rs8181608  | 35510                           | 0.57 | 0.94   | No          |           |      |                                |                                |                        |
|              |                | rs1895593  | 36278                           | 0.57 | 0.94   | No          |           |      |                                |                                |                        |
|              |                | rs933748   | 36437                           | 0.57 | 0.94   | No          |           |      |                                |                                |                        |
|              |                | rs11067054 | 24536                           | 0.54 | 0.93   | No          |           |      |                                |                                |                        |
|              |                | rs7966567  | 35613                           | 0.53 | 0.88   | No          |           |      |                                |                                |                        |
|              |                | rs7307520  | 32394                           | 0.53 | 0.88   | No          |           |      |                                |                                |                        |
| rs10762941   | A              | rs10762941 | 0                               | 1    | 1      | No          |           |      |                                |                                |                        |
| rs10800507   | C              | rs10800507 | 0                               | 1    | 1      | No          |           |      |                                |                                |                        |
|              |                | rs4656206  | 6577                            | 0.7  | 0.96   | No          |           |      |                                |                                |                        |
|              |                | rs10919327 | 14127                           | 0.57 | 1      | No          |           |      |                                |                                |                        |
|              |                | rs10753800 | 4406                            | 0.55 | 0.95   | No          |           |      |                                |                                |                        |
| rs10849152   | T              | rs10849152 | 0                               | 1    | 1      | No          |           |      |                                |                                |                        |
| rs10919369   | T              | rs10919369 | 0                               | 1    | 1      | No          |           |      |                                |                                |                        |
| rs10947261   | G              | rs10947261 | 0                               | 1    | 1      | No          |           |      |                                |                                |                        |
| rs11466656   | C              | rs11466656 | 0                               | 1    | 1      | No          |           |      |                                |                                |                        |
| rs12370365   | G              | rs12370365 | 0                               | 1    | 1      | No          |           |      |                                |                                |                        |
|              |                | rs12828578 | 3073                            | 1    | 1      | No          |           |      |                                |                                |                        |
|              |                | rs73142614 | 14693                           | 1    | 1      | No          |           |      |                                |                                |                        |
|              |                | rs12367127 | 17951                           | 0.95 | 1      | No          |           |      |                                |                                |                        |
|              |                | rs11177719 | 22504                           | 0.95 | 1      | No          |           |      |                                |                                |                        |
|              |                | rs11177730 | 42852                           | 0.95 | 1      | No          |           |      |                                |                                |                        |
|              |                | rs11177731 | 42976                           | 0.95 | 1      | No          |           |      |                                |                                |                        |
|              |                | rs11177732 | 45010                           | 0.95 | 1      | No          |           |      |                                |                                |                        |
|              |                | rs11177733 | 46753                           | 0.95 | 1      | No          |           |      |                                |                                |                        |
|              |                | rs1043434  | 50687                           | 0.95 | 1      | No          |           |      |                                |                                |                        |
|              |                | rs11177738 | 51835                           | 0.95 | 1      | No          |           |      |                                |                                |                        |
|              |                | rs35956654 | 51990                           | 0.95 | 1      | No          |           |      |                                |                                |                        |
|              |                | rs11832926 | 55559                           | 0.95 | 1      | No          |           |      |                                |                                |                        |
|              |                | rs4761246  | 56347                           | 0.95 | 1      | No          |           |      |                                |                                |                        |
|              |                | rs7200     | 59172                           | 0.95 | 1      | No          |           |      |                                |                                |                        |
|              |                | rs3177122  | 59246                           | 0.95 | 1      | No          |           |      |                                |                                |                        |
|              |                | rs35232489 | 61181                           | 0.95 | 1      | No          |           |      |                                |                                |                        |
|              |                | rs4761247  | 62214                           | 0.95 | 1      | No          |           |      |                                |                                |                        |
|              |                | rs11177748 | 63964                           | 0.95 | 1      | No          |           |      |                                |                                |                        |

**Supplemental Table 8. eQTL analyses using the Genotype-Tissue Expression Portal (GTEx) and Cleveland Clinic Atrial Tissue Bank.**

**Europeans**

| Sentinel SNP       | AF Risk Allele | Proxy SNP  | Distance from Sentinel SNP (bp) | r2   | DPrime | eQTL Yes/No | Tissue    | Gene      | fold change per AF risk allele | Direction of expression change | P value                |
|--------------------|----------------|------------|---------------------------------|------|--------|-------------|-----------|-----------|--------------------------------|--------------------------------|------------------------|
|                    |                | rs727948   | 64417                           | 0.95 | 1      | No          |           |           |                                |                                |                        |
|                    |                | rs11177751 | 66387                           | 0.95 | 1      | No          |           |           |                                |                                |                        |
| rs12370365 (cont.) |                | rs10784788 | 72658                           | 0.95 | 1      | No          |           |           |                                |                                |                        |
|                    |                | rs11177710 | 1513                            | 0.95 | 1      | No          |           |           |                                |                                |                        |
|                    |                | rs11177699 | 28499                           | 0.95 | 1      | No          |           |           |                                |                                |                        |
|                    |                | rs11829505 | 30972                           | 0.95 | 1      | No          |           |           |                                |                                |                        |
|                    | A              | rs11177695 | 40356                           | 0.95 | 1      | No          |           |           |                                |                                |                        |
|                    |                | rs35612761 | 16274                           | 0.9  | 1      | No          |           |           |                                |                                |                        |
|                    |                | rs12319536 | 42522                           | 0.9  | 1      | No          |           |           |                                |                                |                        |
|                    |                | rs73140582 | 30361                           | 0.9  | 1      | No          |           |           |                                |                                |                        |
|                    |                | rs11177694 | 42127                           | 0.9  | 1      | No          |           |           |                                |                                |                        |
|                    |                | rs12371904 | 55142                           | 0.9  | 1      | No          |           |           |                                |                                |                        |
|                    |                | rs4761243  | 13299                           | 0.89 | 0.95   | No          |           |           |                                |                                |                        |
|                    |                | rs3759202  | 41243                           | 0.89 | 0.95   | No          |           |           |                                |                                |                        |
|                    |                | rs12370028 | 43037                           | 0.89 | 0.95   | No          |           |           |                                |                                |                        |
|                    |                | rs11177752 | 69433                           | 0.89 | 0.95   | No          |           |           |                                |                                |                        |
|                    |                | rs3858594  | 49351                           | 0.85 | 0.95   | No          |           |           |                                |                                |                        |
|                    |                | rs73140585 | 29559                           | 0.84 | 1      | No          |           |           |                                |                                |                        |
|                    |                | rs11177742 | 58938                           | 0.84 | 0.94   | No          |           |           |                                |                                |                        |
|                    |                | rs11177726 | 32909                           | 0.82 | 1      | No          |           |           |                                |                                |                        |
|                    |                | rs34929418 | 77222                           | 0.67 | 0.88   | No          |           |           |                                |                                |                        |
| rs12406668         | T              | rs12406668 | 0                               | 1    | 1      | No          |           |           |                                |                                |                        |
| rs12415501         | T              | rs12415501 | 0                               | 1    | 1      | No          |           |           |                                |                                |                        |
|                    |                | rs12253987 | 6173                            | 0.75 | 1      | No          |           |           |                                |                                |                        |
|                    |                | rs7893473  | 15172                           | 0.56 | 0.83   | No          |           |           |                                |                                |                        |
|                    |                | rs7904046  | 24868                           | 0.56 | 0.83   | No          |           |           |                                |                                |                        |
|                    |                | rs6584557  | 24888                           | 0.56 | 0.83   | No          |           |           |                                |                                |                        |
|                    |                | rs6584555  | 25163                           | 0.56 | 0.83   | No          |           |           |                                |                                |                        |
|                    |                | rs6584554  | 25298                           | 0.56 | 0.83   | No          |           |           |                                |                                |                        |
|                    |                | rs11191727 | 2401                            | 0.53 | 0.76   | No          |           |           |                                |                                |                        |
| rs12733930         | C              | rs12733930 | 0                               | 1    | 1      | Yes         | Heart, LA | LINC00467 | 0.81 (0.78-0.83)               | decrease                       | 1.59x10 <sup>-24</sup> |
| rs12991989         | C              | rs12991989 | 0                               | 1    | 1      | No          |           |           |                                |                                |                        |
| rs13169864         | G              | rs13169864 | 0                               | 1    | 1      | No          |           |           |                                |                                |                        |
| rs13216675         | T              | rs13216675 | 0                               | 1    | 1      | Yes         | Heart, LA | GJA1      | 0.93 (0.91-0.96)               | decrease                       | 9.84x10 <sup>-05</sup> |
|                    | T              | rs9482226  | 4700                            | 1    | 1      | Yes         | Heart, LA | GJA1      | 0.93 (0.91-0.96)               | decrease                       | 9.90x10 <sup>-05</sup> |
|                    | T              | rs35492344 | 5176                            | 1    | 1      | Yes         | Heart, LA | GJA1      | 0.93 (0.91-0.96)               | decrease                       | 9.93x10 <sup>-05</sup> |
|                    | T              | rs12664873 | 10862                           | 1    | 1      | Yes         | Heart, LA | GJA1      | 0.93 (0.91-0.96)               | decrease                       | 6.24x10 <sup>-05</sup> |
|                    | G              | rs2315817  | 13289                           | 1    | 1      | Yes         | Heart, LA | GJA1      | 0.93 (0.91-0.96)               | decrease                       | 1.48x10 <sup>-04</sup> |
|                    | C              | rs6914962  | 20494                           | 1    | 1      | Yes         | Heart, LA | GJA1      | 0.93 (0.91-0.96)               | decrease                       | 5.53x10 <sup>-05</sup> |
|                    | T              | rs6929586  | 24286                           | 1    | 1      | Yes         | Heart, LA | GJA1      | 0.93 (0.91-0.96)               | decrease                       | 5.72x10 <sup>-05</sup> |
|                    | C              | rs6907053  | 24366                           | 1    | 1      | Yes         | Heart, LA | GJA1      | 0.93 (0.91-0.96)               | decrease                       | 4.60x10 <sup>-05</sup> |
|                    | C              | rs13194963 | 33998                           | 1    | 1      | Yes         | Heart, LA | GJA1      | 0.93 (0.91-0.96)               | decrease                       | 5.59x10 <sup>-05</sup> |
|                    | G              | rs13195388 | 34163                           | 1    | 1      | Yes         | Heart, LA | GJA1      | 0.93 (0.91-0.96)               | decrease                       | 4.57x10 <sup>-05</sup> |
|                    | T              | rs12662754 | 35466                           | 1    | 1      | Yes         | Heart, LA | GJA1      | 0.93 (0.91-0.96)               | decrease                       | 4.36x10 <sup>-05</sup> |
|                    | G              | rs12661247 | 35634                           | 1    | 1      | Yes         | Heart, LA | GJA1      | 0.93 (0.91-0.96)               | decrease                       | 7.10x10 <sup>-05</sup> |
|                    | C              | rs13216068 | 38739                           | 1    | 1      | Yes         | Heart, LA | GJA1      | 0.93 (0.91-0.96)               | decrease                       | 4.11x10 <sup>-05</sup> |
|                    | C              | rs34247913 | 46175                           | 1    | 1      | Yes         | Heart, LA | GJA1      | 0.93 (0.91-0.96)               | decrease                       | 3.93x10 <sup>-05</sup> |
|                    | C              | rs12662023 | 48074                           | 1    | 1      | Yes         | Heart, LA | GJA1      | 0.93 (0.91-0.96)               | decrease                       | 4.02x10 <sup>-05</sup> |
|                    | G              | rs17084326 | 53264                           | 1    | 1      | Yes         | Heart, LA | GJA1      | 0.93 (0.91-0.96)               | decrease                       | 4.02x10 <sup>-05</sup> |
|                    | T              | rs7772537  | 54213                           | 1    | 1      | Yes         | Heart, LA | GJA1      | 0.93 (0.90-0.95)               | decrease                       | 3.40x10 <sup>-05</sup> |
|                    | C              | rs17084333 | 56081                           | 1    | 1      | Yes         | Heart, LA | GJA1      | 0.93 (0.91-0.95)               | decrease                       | 2.65x10 <sup>-05</sup> |
|                    | A              | rs35735278 | 56368                           | 1    | 1      | Yes         | Heart, LA | GJA1      | 0.93 (0.91-0.95)               | decrease                       | 2.65x10 <sup>-05</sup> |
|                    | T              | rs34379825 | 56661                           | 1    | 1      | Yes         | Heart, LA | GJA1      | 0.93 (0.91-0.95)               | decrease                       | 2.69x10 <sup>-05</sup> |
|                    | G              | rs1456696  | 58558                           | 1    | 1      | Yes         | Heart, LA | GJA1      | 0.93 (0.91-0.96)               | decrease                       | 7.01x10 <sup>-05</sup> |
|                    | G              | rs13197292 | 74258                           | 1    | 1      | Yes         | Heart, LA | GJA1      | 0.93 (0.91-0.96)               | decrease                       | 5.74x10 <sup>-05</sup> |
|                    | C              | rs1531187  | 76146                           | 1    | 1      | Yes         | Heart, LA | GJA1      | 0.93 (0.91-0.96)               | decrease                       | 6.54x10 <sup>-05</sup> |
|                    | T              | rs12664347 | 79887                           | 1    | 1      | Yes         | Heart, LA | GJA1      | 0.93 (0.91-0.96)               | decrease                       | 6.48x10 <sup>-05</sup> |
|                    | G              | rs12662844 | 79944                           | 1    | 1      | Yes         | Heart, LA | GJA1      | 0.93 (0.91-0.96)               | decrease                       | 6.48x10 <sup>-05</sup> |
|                    | T              | rs6905707  | 85458                           | 1    | 1      | Yes         | Heart, LA | GJA1      | 0.93 (0.91-0.96)               | decrease                       | 6.48x10 <sup>-05</sup> |
|                    | T              | rs1379090  | 87053                           | 1    | 1      | Yes         | Heart, LA | GJA1      | 0.93 (0.91-0.96)               | decrease                       | 6.46x10 <sup>-05</sup> |
|                    | G              | rs13204964 | 88784                           | 1    | 1      | Yes         | Heart, LA | GJA1      | 0.93 (0.91-0.96)               | decrease                       | 7.41x10 <sup>-05</sup> |
|                    | G              | rs12664221 | 93989                           | 1    | 1      | Yes         | Heart, LA | GJA1      | 0.93 (0.91-0.96)               | decrease                       | 6.36x10 <sup>-05</sup> |
|                    | C              | rs1350228  | 94808                           | 1    | 1      | Yes         | Heart, LA | GJA1      | 0.93 (0.91-0.96)               | decrease                       | 6.34x10 <sup>-05</sup> |
|                    | A              | rs2316267  | 95710                           | 1    | 1      | Yes         | Heart, LA | GJA1      | 0.93 (0.91-0.96)               | decrease                       | 6.33x10 <sup>-05</sup> |
|                    | G              | rs786101   | 100364                          | 1    | 1      | Yes         | Heart, LA | GJA1      | 0.93 (0.91-0.96)               | decrease                       | 6.27x10 <sup>-05</sup> |
|                    | C              | rs1456694  | 102250                          | 1    | 1      | Yes         | Heart, LA | GJA1      | 0.93 (0.91-0.96)               | decrease                       | 6.24x10 <sup>-05</sup> |
|                    | T              | rs12661882 | 103760                          | 1    | 1      | Yes         | Heart, LA | GJA1      | 0.93 (0.91-0.96)               | decrease                       | 6.22x10 <sup>-05</sup> |
|                    | T              | rs17084362 | 107847                          | 1    | 1      | Yes         | Heart, LA | GJA1      | 0.93 (0.91-0.96)               | decrease                       | 6.17x10 <sup>-05</sup> |
|                    | C              | rs786100   | 110424                          | 1    | 1      | Yes         | Heart, LA | GJA1      | 0.93 (0.91-0.96)               | decrease                       | 6.13x10 <sup>-05</sup> |
|                    | G              | rs2770118  | 117395                          | 1    | 1      | Yes         | Heart, LA | GJA1      | 0.93 (0.91-0.96)               | decrease                       | 6.02x10 <sup>-05</sup> |
|                    | A              | rs2606593  | 120794                          | 1    | 1      | Yes         | Heart, LA | GJA1      | 0.93 (0.91-0.96)               | decrease                       | 5.20x10 <sup>-05</sup> |
|                    | C              | rs2606592  | 121483                          | 1    | 1      | Yes         | Heart, LA | GJA1      | 0.93 (0.91-0.96)               | decrease                       | 5.20x10 <sup>-05</sup> |
|                    | A              | rs2770119  | 121627                          | 1    | 1      | Yes         | Heart, LA | GJA1      | 0.93 (0.91-0.96)               | decrease                       | 5.19x10 <sup>-05</sup> |
|                    | A              | rs35099519 | 125942                          | 1    | 1      | Yes         | Heart, LA | GJA1      | 0.93 (0.90-0.95)               | decrease                       | 2.97x10 <sup>-05</sup> |
|                    | A              | rs225089   | 126727                          | 1    | 1      | Yes         | Heart, LA | GJA1      | 0.93 (0.91-0.96)               | decrease                       | 4.69x10 <sup>-05</sup> |
|                    | G              | rs6916464  | 13897                           | 0.96 | 1      | Yes         | Heart, LA | GJA1      | 0.93 (0.91-0.96)               | decrease                       | 3.72x10 <sup>-05</sup> |
|                    | A              | rs12665325 | 15783                           | 0.96 | 1      | Yes         | Heart, LA | GJA1      | 0.93 (0.91-0.96)               | decrease                       | 2.90x10 <sup>-05</sup> |
|                    | A              | rs2078231  | 30387                           | 0.96 | 1      | Yes         | Heart, LA | GJA1      | 0.93 (0.91-0.96)               | decrease                       | 3.15x10 <sup>-05</sup> |
|                    | A              | rs12664154 | 35982                           | 0.96 | 1      | Yes         | Heart, LA | GJA1      | 0.93 (0.91-0.95)               | decrease                       | 2.82x10 <sup>-05</sup> |

**Supplemental Table 8. eQTL analyses using the Genotype-Tissue Expression Portal (GTEx) and Cleveland Clinic Atrial Tissue Bank.**

**Europeans**

| Sentinel SNP       | AF Risk Allele | Proxy SNP   | Distance from Sentinel SNP (bp) | r2   | DPrime | eQTL Yes/No | Tissue    | Gene | fold change per AF risk allele | Direction of expression change | P value                |
|--------------------|----------------|-------------|---------------------------------|------|--------|-------------|-----------|------|--------------------------------|--------------------------------|------------------------|
|                    | G              | rs7450267   | 36705                           | 0.96 | 1      | Yes         | Heart, LA | GJA1 | 0.93 (0.91-0.95)               | decrease                       | 2.78x10 <sup>-05</sup> |
|                    | C              | rs1456699   | 37617                           | 0.96 | 1      | Yes         | Heart, LA | GJA1 | 0.93 (0.91-0.95)               | decrease                       | 2.72x10 <sup>-05</sup> |
| rs13216675 (cont.) | C              | rs2316266   | 44298                           | 0.96 | 1      | Yes         | Heart, LA | GJA1 | 0.93 (0.91-0.95)               | decrease                       | 2.67x10 <sup>-05</sup> |
|                    |                | rs71571139  | 68131                           | 0.96 | 1      | Yes         | Heart, LA | GJA1 |                                |                                | 4.43x10 <sup>-05</sup> |
|                    | A              | rs35085009  | 74725                           | 0.96 | 1      | Yes         | Heart, LA | GJA1 | 0.93 (0.91-0.96)               | decrease                       | 4.51x10 <sup>-05</sup> |
|                    | C              | rs12661091  | 75488                           | 0.96 | 1      | Yes         | Heart, LA | GJA1 | 0.93 (0.91-0.96)               | decrease                       | 5.19x10 <sup>-05</sup> |
|                    | A              | rs1379088   | 92575                           | 0.96 | 1      | Yes         | Heart, LA | GJA1 | 0.93 (0.90-0.96)               | decrease                       | 4.29x10 <sup>-05</sup> |
|                    | T              | rs1456693   | 102299                          | 0.96 | 1      | Yes         | Heart, LA | GJA1 | 0.93 (0.91-0.96)               | decrease                       | 4.20x10 <sup>-05</sup> |
|                    | A              | rs1456692   | 102354                          | 0.96 | 1      | Yes         | Heart, LA | GJA1 | 0.93 (0.91-0.96)               | decrease                       | 4.20x10 <sup>-05</sup> |
|                    | C              | rs1585127   | 102914                          | 0.96 | 1      | Yes         | Heart, LA | GJA1 | 0.93 (0.91-0.96)               | decrease                       | 4.19x10 <sup>-05</sup> |
|                    | C              | rs12660649  | 104268                          | 0.96 | 1      | Yes         | Heart, LA | GJA1 | 0.93 (0.91-0.96)               | decrease                       | 4.18x10 <sup>-05</sup> |
|                    | A              | rs1870005   | 115810                          | 0.96 | 1      | Yes         | Heart, LA | GJA1 | 0.93 (0.91-0.96)               | decrease                       | 6.32x10 <sup>-05</sup> |
|                    | G              | rs2085400   | 117016                          | 0.96 | 1      | Yes         | Heart, LA | GJA1 | 0.93 (0.91-0.96)               | decrease                       | 4.05x10 <sup>-05</sup> |
|                    | A              | rs2770117   | 117281                          | 0.96 | 1      | Yes         | Heart, LA | GJA1 | 0.93 (0.91-0.96)               | decrease                       | 4.07x10 <sup>-05</sup> |
|                    | A              | rs12661260  | 123757                          | 0.96 | 1      | Yes         | Heart, LA | GJA1 | 0.93 (0.90-0.95)               | decrease                       | 3.46x10 <sup>-05</sup> |
|                    | G              | rs12662551  | 39193                           | 0.96 | 1      | Yes         | Heart, LA | GJA1 | 0.93 (0.91-0.96)               | decrease                       | 4.14x10 <sup>-05</sup> |
|                    | T              | rs12665385  | 57279                           | 0.96 | 1      | Yes         | Heart, LA | GJA1 | 0.93 (0.90-0.95)               | decrease                       | 1.74x10 <sup>-05</sup> |
|                    | T              | rs1947540   | 59846                           | 0.96 | 1      | Yes         | Heart, LA | GJA1 | 0.93 (0.91-0.96)               | decrease                       | 7.01x10 <sup>-05</sup> |
|                    | G              | rs7738124   | 70512                           | 0.96 | 1      | Yes         | Heart, LA | GJA1 | 0.93 (0.91-0.96)               | decrease                       | 6.93x10 <sup>-05</sup> |
|                    | G              | rs1085381   | 113181                          | 0.96 | 1      | Yes         | Heart, LA | GJA1 | 0.93 (0.91-0.96)               | decrease                       | 7.27x10 <sup>-05</sup> |
|                    | A              | rs225090    | 127148                          | 0.96 | 1      | Yes         | Heart, LA | GJA1 | 0.93 (0.91-0.96)               | decrease                       | 4.68x10 <sup>-05</sup> |
|                    | G              | rs225072    | 133807                          | 0.96 | 1      | Yes         | Heart, LA | GJA1 | 0.93 (0.91-0.96)               | decrease                       | 4.56x10 <sup>-05</sup> |
|                    | C              | rs225075    | 137551                          | 0.96 | 1      | Yes         | Heart, LA | GJA1 | 0.93 (0.91-0.96)               | decrease                       | 4.52x10 <sup>-05</sup> |
|                    | T              | rs225076    | 138042                          | 0.96 | 1      | Yes         | Heart, LA | GJA1 | 0.93 (0.91-0.96)               | decrease                       | 4.52x10 <sup>-05</sup> |
|                    | C              | rs12663999  | 142878                          | 0.96 | 1      | Yes         | Heart, LA | GJA1 | 0.93 (0.91-0.96)               | decrease                       | 4.52x10 <sup>-05</sup> |
|                    | A              | rs225084    | 143880                          | 0.96 | 1      | Yes         | Heart, LA | GJA1 | 0.93 (0.91-0.96)               | decrease                       | 4.52x10 <sup>-05</sup> |
|                    | T              | rs225086    | 146040                          | 0.96 | 1      | Yes         | Heart, LA | GJA1 | 0.93 (0.91-0.96)               | decrease                       | 4.52x10 <sup>-05</sup> |
|                    | A              | rs12660540  | 151433                          | 0.96 | 1      | Yes         | Heart, LA | GJA1 | 0.93 (0.91-0.96)               | decrease                       | 4.51x10 <sup>-05</sup> |
|                    | G              | rs13212529  | 153658                          | 0.96 | 1      | Yes         | Heart, LA | GJA1 | 0.93 (0.91-0.96)               | decrease                       | 4.52x10 <sup>-05</sup> |
|                    | T              | rs12663673  | 153812                          | 0.96 | 1      | Yes         | Heart, LA | GJA1 | 0.93 (0.91-0.96)               | decrease                       | 4.52x10 <sup>-05</sup> |
|                    | A              | rs34528281  | 154554                          | 0.96 | 1      | Yes         | Heart, LA | GJA1 | 0.93 (0.91-0.96)               | decrease                       | 4.52x10 <sup>-05</sup> |
|                    | A              | rs2066121   | 157547                          | 0.96 | 1      | Yes         | Heart, LA | GJA1 | 0.93 (0.91-0.96)               | decrease                       | 4.52x10 <sup>-05</sup> |
|                    | G              | rs80080630  | 167729                          | 0.96 | 1      | Yes         | Heart, LA | GJA1 | 0.93 (0.90-0.96)               | decrease                       | 5.34x10 <sup>-05</sup> |
|                    | G              | rs1840763   | 169446                          | 0.96 | 1      | Yes         | Heart, LA | GJA1 | 0.93 (0.91-0.96)               | decrease                       | 4.52x10 <sup>-05</sup> |
|                    | T              | rs1011654   | 172940                          | 0.96 | 1      | Yes         | Heart, LA | GJA1 | 0.93 (0.91-0.96)               | decrease                       | 4.45x10 <sup>-05</sup> |
|                    | G              | rs1339527   | 177975                          | 0.96 | 1      | Yes         | Heart, LA | GJA1 | 0.93 (0.91-0.96)               | decrease                       | 4.52x10 <sup>-05</sup> |
|                    | T              | rs517442    | 188091                          | 0.96 | 1      | Yes         | Heart, LA | GJA1 | 0.93 (0.91-0.96)               | decrease                       | 4.52x10 <sup>-05</sup> |
|                    | C              | rs509860    | 193433                          | 0.96 | 1      | Yes         | Heart, LA | GJA1 | 0.93 (0.91-0.96)               | decrease                       | 5.37x10 <sup>-05</sup> |
|                    | A              | rs35622021  | 201279                          | 0.96 | 1      | Yes         | Heart, LA | GJA1 | 0.93 (0.91-0.96)               | decrease                       | 4.53x10 <sup>-05</sup> |
|                    | T              | rs17662069  | 201879                          | 0.96 | 1      | Yes         | Heart, LA | GJA1 | 0.93 (0.91-0.96)               | decrease                       | 4.53x10 <sup>-05</sup> |
|                    | G              | rs13204922  | 206664                          | 0.96 | 1      | Yes         | Heart, LA | GJA1 | 0.93 (0.91-0.96)               | decrease                       | 4.52x10 <sup>-05</sup> |
|                    | G              | rs589593    | 208468                          | 0.96 | 1      | Yes         | Heart, LA | GJA1 | 0.93 (0.91-0.96)               | decrease                       | 7.40x10 <sup>-05</sup> |
|                    | C              | rs1456697   | 41438                           | 0.92 | 1      | Yes         | Heart, LA | GJA1 | 0.93 (0.91-0.96)               | decrease                       | 3.72x10 <sup>-05</sup> |
|                    | T              | rs6569253   | 81488                           | 0.92 | 1      | Yes         | Heart, LA | GJA1 | 0.93 (0.91-0.96)               | decrease                       | 4.35x10 <sup>-05</sup> |
|                    | C              | rs1870006   | 115649                          | 0.92 | 1      | Yes         | Heart, LA | GJA1 | 0.93 (0.91-0.96)               | decrease                       | 4.06x10 <sup>-05</sup> |
|                    | G              | rs1870004   | 115897                          | 0.92 | 1      | Yes         | Heart, LA | GJA1 | 0.93 (0.91-0.96)               | decrease                       | 4.06x10 <sup>-05</sup> |
|                    | G              | rs1870001   | 116308                          | 0.92 | 1      | Yes         | Heart, LA | GJA1 | 0.93 (0.91-0.96)               | decrease                       | 4.98x10 <sup>-05</sup> |
|                    | T              | rs2085401   | 116906                          | 0.92 | 1      | Yes         | Heart, LA | GJA1 | 0.93 (0.91-0.96)               | decrease                       | 6.03x10 <sup>-05</sup> |
|                    | C              | rs35461771  | 15518                           | 0.92 | 1      | Yes         | Heart, LA | GJA1 | 0.93 (0.91-0.96)               | decrease                       | 5.58x10 <sup>-05</sup> |
|                    | C              | rs587465    | 167728                          | 0.92 | 1      | Yes         | Heart, LA | GJA1 | 0.93 (0.90-0.96)               | decrease                       | 5.89x10 <sup>-05</sup> |
|                    | T              | rs13209385  | 168730                          | 0.92 | 1      | Yes         | Heart, LA | GJA1 | 0.93 (0.91-0.96)               | decrease                       | 4.52x10 <sup>-05</sup> |
|                    | G              | rs620105    | 209281                          | 0.92 | 1      | Yes         | Heart, LA | GJA1 | 0.93 (0.91-0.96)               | decrease                       | 4.42x10 <sup>-05</sup> |
|                    | G              | rs6569252   | 67844                           | 0.92 | 0.96   | Yes         | Heart, LA | GJA1 | 0.93 (0.91-0.96)               | decrease                       | 4.70x10 <sup>-05</sup> |
|                    | T              | rs7757343   | 105976                          | 0.92 | 0.96   | Yes         | Heart, LA | GJA1 | 0.93 (0.91-0.96)               | decrease                       | 6.20x10 <sup>-05</sup> |
|                    | T              | rs225073    | 133909                          | 0.92 | 0.96   | Yes         | Heart, LA | GJA1 | 0.93 (0.91-0.96)               | decrease                       | 4.56x10 <sup>-05</sup> |
|                    | G              | rs761955    | 149047                          | 0.92 | 0.96   | Yes         | Heart, LA | GJA1 | 0.93 (0.91-0.96)               | decrease                       | 4.52x10 <sup>-05</sup> |
|                    | G              | rs536165    | 167986                          | 0.92 | 0.96   | Yes         | Heart, LA | GJA1 | 0.93 (0.91-0.96)               | decrease                       | 4.52x10 <sup>-05</sup> |
|                    | G              | rs537456    | 199007                          | 0.92 | 0.96   | Yes         | Heart, LA | GJA1 | 0.93 (0.90-0.96)               | decrease                       | 3.83x10 <sup>-05</sup> |
|                    | A              | rs528991    | 211128                          | 0.92 | 0.96   | Yes         | Heart, LA | GJA1 | 0.93 (0.91-0.96)               | decrease                       | 4.84x10 <sup>-05</sup> |
|                    | G              | rs1456698   | 41435                           | 0.88 | 0.96   | Yes         | Heart, LA | GJA1 | 0.93 (0.90-0.95)               | decrease                       | 2.58x10 <sup>-05</sup> |
|                    | T              | rs35859246  | 58146                           | 0.88 | 1      | Yes         | Heart, LA | GJA1 | 0.93 (0.91-0.96)               | decrease                       | 7.46x10 <sup>-05</sup> |
|                    | T              | rs225078    | 163096                          | 0.88 | 0.96   | Yes         | Heart, LA | GJA1 | 0.93 (0.91-0.96)               | decrease                       | 3.80x10 <sup>-05</sup> |
|                    | C              | rs59472001  | 216442                          | 0.87 | 0.96   | Yes         | Heart, LA | GJA1 | 0.93 (0.90-0.95)               | decrease                       | 2.38x10 <sup>-05</sup> |
|                    | A              | rs6929685   | 216461                          | 0.87 | 0.96   | Yes         | Heart, LA | GJA1 | 0.93 (0.90-0.95)               | decrease                       | 2.37x10 <sup>-05</sup> |
|                    | G              | rs10499118  | 221398                          | 0.87 | 0.96   | Yes         | Heart, LA | GJA1 | 0.93 (0.90-0.95)               | decrease                       | 1.28x10 <sup>-05</sup> |
|                    | G              | rs34607745  | 223006                          | 0.87 | 0.96   | Yes         | Heart, LA | GJA1 | 0.93 (0.90-0.95)               | decrease                       | 2.52x10 <sup>-05</sup> |
|                    | G              | rs3968436   | 223803                          | 0.87 | 0.96   | Yes         | Heart, LA | GJA1 | 0.93 (0.90-0.95)               | decrease                       | 1.21x10 <sup>-05</sup> |
|                    | T              | rs13192258  | 224748                          | 0.87 | 0.96   | Yes         | Heart, LA | GJA1 | 0.93 (0.90-0.95)               | decrease                       | 1.16x10 <sup>-05</sup> |
|                    | G              | rs1610023   | 225035                          | 0.87 | 0.96   | Yes         | Heart, LA | GJA1 | 0.93 (0.90-0.95)               | decrease                       | 1.14x10 <sup>-05</sup> |
|                    | A              | rs117131686 | 227756                          | 0.87 | 0.96   | Yes         | Heart, LA | GJA1 | 0.93 (0.90-0.95)               | decrease                       | 1.36x10 <sup>-05</sup> |
|                    | C              | rs35347829  | 229401                          | 0.87 | 0.96   | Yes         | Heart, LA | GJA1 | 0.93 (0.90-0.95)               | decrease                       | 1.47x10 <sup>-05</sup> |
|                    | C              | rs12661045  | 230466                          | 0.87 | 0.96   | Yes         | Heart, LA | GJA1 | 0.93 (0.90-0.95)               | decrease                       | 1.44x10 <sup>-05</sup> |
|                    | G              | rs34531455  | 230872                          | 0.83 | 0.91   | Yes         | Heart, LA | GJA1 | 0.93 (0.90-0.95)               | decrease                       | 1.38x10 <sup>-05</sup> |
|                    | G              | rs1416731   | 256357                          | 0.83 | 0.91   | Yes         | Heart, LA | GJA1 | 0.93 (0.90-0.95)               | decrease                       | 2.06x10 <sup>-05</sup> |
|                    | C              | rs13218584  | 227314                          | 0.83 | 0.95   | Yes         | Heart, LA | GJA1 | 0.93 (0.90-0.95)               | decrease                       | 1.04x10 <sup>-05</sup> |
|                    | C              | rs61379124  | 19087                           | 0.8  | 0.95   | Yes         | Heart, LA | GJA1 | 0.93 (0.90-0.95)               | decrease                       | 1.32x10 <sup>-05</sup> |
|                    | T              | rs11758026  | 20300                           | 0.8  | 0.95   | Yes         | Heart, LA | GJA1 | 0.93 (0.90-0.95)               | decrease                       | 8.08x10 <sup>-06</sup> |
|                    | T              | rs71571147  | 224205                          | 0.79 | 0.95   | Yes         | Heart, LA | GJA1 | 0.92 (0.88-0.94)               | decrease                       | 8.23x10 <sup>-06</sup> |
|                    | C              | rs7741444   | 231629                          | 0.79 | 0.91   | Yes         | Heart, LA | GJA1 | 0.93 (0.90-0.95)               | decrease                       | 1.16x10 <sup>-05</sup> |



**Supplemental Table 8. eQTL analyses using the Genotype-Tissue Expression Portal (GTEx) and Cleveland Clinic Atrial Tissue Bank.**

**Europeans**

| Sentinel SNP       | AF Risk Allele | Proxy SNP  | Distance from Sentinel SNP (bp) | r2   | DPrime | eQTL Yes/No | Tissue          | Gene     | fold change per AF risk allele | Direction of expression change | P value                |
|--------------------|----------------|------------|---------------------------------|------|--------|-------------|-----------------|----------|--------------------------------|--------------------------------|------------------------|
|                    | T              | rs7761904  | 231727                          | 0.79 | 0.91   | Yes         | Heart, LA       | GJA1     | 0.93 (0.90-0.95)               | decrease                       | 1.14x10 <sup>-05</sup> |
|                    | A              | rs7742289  | 232136                          | 0.79 | 0.91   | Yes         | Heart, LA       | GJA1     | 0.93 (0.90-0.95)               | decrease                       | 9.93x10 <sup>-06</sup> |
| rs13216675 (cont.) | G              | rs2316672  | 245634                          | 0.79 | 0.91   | Yes         | Heart, LA       | GJA1     | 0.93 (0.90-0.95)               | decrease                       | 2.34x10 <sup>-05</sup> |
|                    | C              | rs7773091  | 57695                           | 0.76 | 1      | Yes         | Heart, LA       | GJA1     | 0.93 (0.90-0.95)               | decrease                       | 1.08x10 <sup>-05</sup> |
|                    |                | rs75033796 | 226772                          | 0.75 | 0.95   | No          |                 |          |                                |                                |                        |
|                    | A              | rs1379096  | 19917                           | 0.72 | 0.87   | Yes         | Heart, LA       | GJA1     | 0.93 (0.89-0.94)               | decrease                       | 2.76x10 <sup>-06</sup> |
|                    | C              | rs34070579 | 7770                            | 0.72 | 0.95   | Yes         | Heart, LA       | GJA1     | 0.92 (0.89-0.95)               | decrease                       | 2.45x10 <sup>-05</sup> |
|                    | C              | rs12665212 | 196287                          | 0.7  | 0.91   | No          |                 |          |                                |                                |                        |
|                    | A              | rs9490444  | 260048                          | 0.67 | 0.9    | No          |                 |          |                                |                                |                        |
|                    | A              | rs939601   | 62686                           | 0.66 | 0.86   | Yes         | Heart, LA       | GJA1     | 0.93 (0.90-0.95)               | decrease                       | 3.43x10 <sup>-06</sup> |
|                    | T              | rs17084191 | 33248                           | 0.63 | 0.86   | Yes         | Heart, LA       | GJA1     | 0.93 (0.90-0.95)               | decrease                       | 1.80x10 <sup>-05</sup> |
|                    | C              | rs13219206 | 38172                           | 0.63 | 0.86   | Yes         | Heart, LA       | GJA1     | 0.93 (0.90-0.95)               | decrease                       | 1.74x10 <sup>-05</sup> |
|                    | A              | rs34483874 | 42367                           | 0.63 | 0.86   | Yes         | Heart, LA       | GJA1     | 0.93 (0.90-0.95)               | decrease                       | 1.73x10 <sup>-05</sup> |
|                    | C              | rs6928224  | 44347                           | 0.63 | 0.86   | Yes         | Heart, LA       | GJA1     | 0.93 (0.90-0.95)               | decrease                       | 1.53x10 <sup>-05</sup> |
|                    | T              | rs6907870  | 44485                           | 0.63 | 0.86   | Yes         | Heart, LA       | GJA1     | 0.93 (0.90-0.95)               | decrease                       | 1.53x10 <sup>-05</sup> |
|                    | C              | rs72966339 | 54088                           | 0.63 | 0.86   | Yes         | Heart, LA       | GJA1     | 0.93 (0.90-0.95)               | decrease                       | 4.12x10 <sup>-06</sup> |
|                    | C              | rs6930575  | 56329                           | 0.63 | 0.86   | Yes         | Heart, LA       | GJA1     | 0.93 (0.90-0.95)               | decrease                       | 4.21x10 <sup>-06</sup> |
|                    | C              | rs6930219  | 56465                           | 0.63 | 0.86   | Yes         | Heart, LA       | GJA1     | 0.93 (0.90-0.95)               | decrease                       | 4.15x10 <sup>-06</sup> |
|                    | C              | rs6901617  | 56860                           | 0.63 | 0.86   | Yes         | Heart, LA       | GJA1     | 0.93 (0.90-0.95)               | decrease                       | 4.71x10 <sup>-06</sup> |
|                    | C              | rs6938223  | 58057                           | 0.63 | 0.86   | Yes         | Heart, LA       | GJA1     | 0.93 (0.90-0.95)               | decrease                       | 3.93x10 <sup>-06</sup> |
|                    | C              | rs17084158 | 58687                           | 0.63 | 0.86   | Yes         | Heart, LA       | GJA1     | 0.93 (0.90-0.95)               | decrease                       | 3.83x10 <sup>-06</sup> |
|                    | C              | rs17084154 | 58885                           | 0.63 | 0.86   | Yes         | Heart, LA       | GJA1     | 0.93 (0.90-0.95)               | decrease                       | 3.80x10 <sup>-06</sup> |
|                    | G              | rs2816099  | 59647                           | 0.63 | 0.86   | Yes         | Heart, LA       | GJA1     | 0.93 (0.90-0.95)               | decrease                       | 1.05x10 <sup>-05</sup> |
|                    | C              | rs2259327  | 60584                           | 0.63 | 0.86   | Yes         | Heart, LA       | GJA1     | 0.93 (0.90-0.95)               | decrease                       | 3.56x10 <sup>-06</sup> |
|                    | A              | rs1357050  | 61194                           | 0.63 | 0.86   | Yes         | Heart, LA       | GJA1     | 0.93 (0.90-0.95)               | decrease                       | 3.50x10 <sup>-06</sup> |
|                    | A              | rs868153   | 62374                           | 0.63 | 0.86   | Yes         | Heart, LA       | GJA1     | 0.93 (0.90-0.95)               | decrease                       | 4.90x10 <sup>-06</sup> |
|                    | C              | rs868154   | 62389                           | 0.63 | 0.86   | Yes         | Heart, LA       | GJA1     | 0.93 (0.90-0.95)               | decrease                       | 3.43x10 <sup>-06</sup> |
|                    | G              | rs868155   | 62423                           | 0.63 | 0.86   | Yes         | Heart, LA       | GJA1     | 0.93 (0.90-0.95)               | decrease                       | 3.43x10 <sup>-06</sup> |
|                    | G              | rs1357051  | 61245                           | 0.6  | 0.86   | Yes         | Heart, LA       | GJA1     | 0.93 (0.90-0.95)               | decrease                       | 1.02x10 <sup>-05</sup> |
|                    | C              | rs1402538  | 63478                           | 0.6  | 0.86   | Yes         | Heart, LA       | GJA1     | 0.93 (0.90-0.95)               | decrease                       | 9.90x10 <sup>-06</sup> |
|                    | A              | rs2684249  | 59818                           | 0.59 | 0.9    | Yes         | Heart, LA       | GJA1     | 0.93 (0.91-0.96)               | decrease                       | 8.36x10 <sup>-05</sup> |
|                    | G              | rs2816098  | 59622                           | 0.58 | 0.81   | Yes         | Heart, LA       | GJA1     | 0.93 (0.90-0.95)               | decrease                       | 3.75x10 <sup>-06</sup> |
|                    | A              | rs2816097  | 56682                           | 0.57 | 0.85   | Yes         | Heart, LA       | GJA1     | 0.93 (0.90-0.95)               | decrease                       | 3.88x10 <sup>-06</sup> |
|                    | T              | rs17199931 | 278629                          | 0.57 | 0.77   | Yes         | Heart, LA       | GJA1     | 0.93 (0.90-0.96)               | decrease                       | 1.43x10 <sup>-04</sup> |
|                    | G              | rs3799545  | 283289                          | 0.57 | 0.77   | No          |                 |          |                                |                                |                        |
|                    | G              | rs17201852 | 339761                          | 0.57 | 0.77   | No          |                 |          |                                |                                |                        |
|                    | G              | rs13199730 | 431186                          | 0.57 | 0.77   | No          |                 |          |                                |                                |                        |
|                    | A              | rs36084496 | 52438                           | 0.55 | 0.85   | Yes         | Heart, LA       | GJA1     | 0.93 (0.90-0.95)               | decrease                       | 4.10x10 <sup>-06</sup> |
|                    | G              | rs2176990  | 58611                           | 0.54 | 0.77   | Yes         | Heart, LA       | GJA1     | 0.93 (0.90-0.95)               | decrease                       | 2.66x10 <sup>-06</sup> |
|                    |                | rs3823188  | 291357                          | 0.54 | 0.73   | No          |                 |          | 0.93 (0.91-0.96)               | decrease                       |                        |
| rs1324739          | G              | rs1324739  | 0                               | 1    | 1      | No          |                 |          |                                |                                |                        |
| rs13396611         | T              | rs13396611 | 0                               | 1    | 1      | No          |                 |          |                                |                                |                        |
| rs2118254          | C              | rs2118254  | 0                               | 1    | 1      | No          |                 |          |                                |                                |                        |
| rs2204224          | T              | rs2204224  | 0                               | 1    | 1      | No          |                 |          |                                |                                |                        |
| rs2249965          | A              | rs2249965  | 0                               | 1    | 1      | No          |                 |          |                                |                                |                        |
| rs2305398          | G              | rs2305398  | 0                               | 1    | 1      | Yes         | Skeletal Muscle | CAND2    |                                | decrease                       | 1.91x10 <sup>-11</sup> |
|                    |                |            |                                 |      |        | Yes         | Skeletal Muscle | KRT18P17 |                                | decrease                       | 7.07x10 <sup>-3</sup>  |
| rs2358891          | G              | rs2358891  | 0                               | 1    | 1      | Yes         | Heart, LA       | WIPF1    | 0.88 (0.85-0.91)               | decrease                       | 8.87x10 <sup>-10</sup> |
| rs2532144          | T              | rs2532144  | 0                               | 1    | 1      | No          |                 |          |                                |                                |                        |
| rs2685217          | T              | rs2685217  | 0                               | 1    | 1      | No          |                 |          |                                |                                |                        |
| rs2723065          | A              | rs2723065  | 0                               | 1    | 1      | Yes         | Tibial Artery   | CEP68    |                                | decrease                       | 1.66x10 <sup>-07</sup> |
|                    |                |            |                                 |      |        | Yes         | Heart, LA       | CEP68    | 1.22 (1.18-1.27)               | increase                       | 2.45x10 <sup>-16</sup> |
|                    | A              | rs2540951  | 2678                            | 1    | 1      | Yes         | Tibial Artery   | CEP68    |                                |                                | 2.22x10 <sup>-07</sup> |
|                    |                |            |                                 |      |        | Yes         | Heart, LA       | CEP68    | 1.22 (1.18-1.27)               | increase                       | 2.39x10 <sup>-16</sup> |
|                    | T              | rs1009358  | 2962                            | 1    | 1      | Yes         | Tibial Artery   | CEP68    |                                |                                | 2.31x10 <sup>-07</sup> |
|                    |                |            |                                 |      |        | Yes         | Heart, LA       | CEP68    | 1.22 (1.18-1.27)               | increase                       | 2.38x10 <sup>-16</sup> |
|                    | A              | rs2540949  | 4817                            | 1    | 1      | Yes         | Tibial Artery   | CEP68    |                                |                                | 1.64x10 <sup>-07</sup> |
|                    |                |            |                                 |      |        | Yes         | Heart, LA       | CEP68    | 1.22 (1.17-1.27)               | increase                       | 1.10x10 <sup>-15</sup> |
|                    | T              | rs2540948  | 5209                            | 1    | 1      | Yes         | Tibial Artery   | CEP68    |                                |                                | 5.58x10 <sup>-06</sup> |
|                    |                |            |                                 |      |        | Yes         | Heart, LA       | CEP68    | 1.22 (1.17-1.27)               | increase                       | 5.52x10 <sup>-16</sup> |
|                    | T              | rs2723064  | 391                             | 0.96 | 1      | Yes         | Tibial Artery   | CEP68    |                                |                                | 1.65x10 <sup>-07</sup> |
|                    |                |            |                                 |      |        | Yes         | Heart, LA       | CEP68    | 1.22 (1.18-1.27)               | increase                       | 2.74x10 <sup>-16</sup> |
|                    | T              | rs74181299 | 4558                            | 0.96 | 1      | Yes         | Tibial Artery   | CEP68    |                                |                                | 2.21x10 <sup>-07</sup> |
|                    |                |            |                                 |      |        | Yes         | Heart, LA       | CEP68    | 1.22 (1.18-1.27)               | increase                       | 1.04x10 <sup>-15</sup> |
|                    | C              | rs2540950  | 191                             | 0.93 | 1      | Yes         | Tibial Artery   | CEP68    |                                |                                | 4.88x10 <sup>-06</sup> |
|                    |                |            |                                 |      |        | Yes         | Heart, LA       | CEP68    | 1.22 (1.18-1.27)               | increase                       | 9.70x10 <sup>-17</sup> |
|                    | G              | rs2723062  | 806                             | 0.93 | 1      | Yes         | Tibial Artery   | CEP68    |                                |                                | 4.88x10 <sup>-06</sup> |
|                    |                |            |                                 |      |        | Yes         | Heart, LA       | CEP68    | 1.22 (1.18-1.27)               | increase                       | 1.44x10 <sup>-16</sup> |
|                    | A              | rs2249105  | 8482                            | 0.93 | 0.96   | Yes         | Tibial Artery   | CEP68    |                                |                                | 4.81x10 <sup>-06</sup> |
|                    |                |            |                                 |      |        | Yes         | Heart, LA       | CEP68    | 1.22 (1.18-1.27)               | increase                       | 2.08x10 <sup>-15</sup> |
|                    | A              | rs2540945  | 10411                           | 0.93 | 0.96   | Yes         | Tibial Artery   | CEP68    |                                |                                | 4.81x10 <sup>-06</sup> |
|                    |                |            |                                 |      |        | Yes         | Heart, LA       | CEP68    | 1.23 (1.18-1.28)               | increase                       | 1.90x10 <sup>-15</sup> |
|                    | T              | rs2723066  | 93                              | 0.89 | 1      | Yes         | Tibial Artery   | CEP68    |                                |                                | 4.88x10 <sup>-06</sup> |
|                    |                |            |                                 |      |        | Yes         | Heart, LA       | CEP68    | 1.22 (1.18-1.27)               | increase                       | 1.11x10 <sup>-16</sup> |
|                    | T              | rs2252867  | 16866                           | 0.86 | 0.96   | Yes         | Tibial Artery   | CEP68    |                                |                                | 4.81x10 <sup>-06</sup> |
|                    |                |            |                                 |      |        | Yes         | Heart, LA       | CEP68    | 1.22 (1.18-1.27)               | increase                       | 2.09x10 <sup>-15</sup> |
|                    | C              | rs2723086  | 18272                           | 0.86 | 0.96   | Yes         | Heart, LA       | CEP68    | 1.23 (1.18-1.27)               | increase                       | 6.03x10 <sup>-16</sup> |
|                    | T              | rs2723087  | 18868                           | 0.86 | 0.96   | Yes         | Tibial Artery   | CEP68    |                                |                                | 9.39x10 <sup>-05</sup> |

**Supplemental Table 8. eQTL analyses using the Genotype-Tissue Expression Portal (GTEx) and Cleveland Clinic Atrial Tissue Bank.**

**Europeans**

| Sentinel SNP      | AF Risk Allele | Proxy SNP   | Distance from Sentinel SNP (bp) | r2   | DPrime | eQTL Yes/No | Tissue        | Gene  | fold change per AF risk allele | Direction of expression change | P value                |
|-------------------|----------------|-------------|---------------------------------|------|--------|-------------|---------------|-------|--------------------------------|--------------------------------|------------------------|
|                   |                |             |                                 |      |        | Yes         | Heart, LA     | CEP68 | 1.22 (1.18-1.27)               | increase                       | 2.42x10 <sup>-15</sup> |
|                   | A              | rs2723063   | 771                             | 0.84 | 1      | Yes         | Tibial Artery | CEP68 |                                |                                | 3.86x10 <sup>-05</sup> |
| rs2723065 (cont.) |                |             |                                 |      |        | Yes         | Heart, LV     | CEP68 |                                |                                | 5.15x10 <sup>-05</sup> |
|                   |                |             |                                 |      |        | Yes         | Heart, LA     | CEP68 | 1.19 (1.14-1.24)               | increase                       | 4.51x10 <sup>-12</sup> |
|                   | T              | rs1009360   | 3365                            | 0.84 | 1      | Yes         | Tibial Artery | CEP68 |                                |                                | 8.25x10 <sup>-05</sup> |
|                   |                |             |                                 |      |        | Yes         | Heart, LA     | CEP68 | 1.18 (1.13-1.23)               | increase                       | 1.52x10 <sup>-05</sup> |
|                   | C              | rs2723082   | 10209                           | 0.82 | 0.96   | Yes         | Tibial Artery | CEP68 |                                |                                | 1.88x10 <sup>-05</sup> |
|                   |                |             |                                 |      |        | Yes         | Heart, LA     | CEP68 | 1.22 (1.18-1.27)               | increase                       | 8.83x10 <sup>-16</sup> |
|                   | C              | rs2723085   | 17945                           | 0.82 | 0.96   | Yes         | Tibial Artery | CEP68 |                                |                                | 1.93x10 <sup>-05</sup> |
|                   |                |             |                                 |      |        | Yes         | Heart, LA     | CEP68 | 1.22 (1.18-1.27)               | increase                       | 8.93x10 <sup>-16</sup> |
|                   | A              | rs1420185   | 36489                           | 0.79 | 0.96   | Yes         | Tibial Artery | CEP68 |                                |                                | 2.64x10 <sup>-06</sup> |
|                   |                |             |                                 |      |        | Yes         | Heart, LA     | CEP68 | 1.22 (1.17-1.27)               | increase                       | 3.18x10 <sup>-13</sup> |
|                   | A              | rs12472718  | 48206                           | 0.79 | 0.96   | Yes         | Tibial Artery | CEP68 |                                |                                | 5.80x10 <sup>-06</sup> |
|                   |                |             |                                 |      |        | Yes         | Heart, LA     | CEP68 | 1.22 (1.17-1.27)               | increase                       | 3.19x10 <sup>-13</sup> |
|                   | A              | rs13421845  | 56619                           | 0.79 | 0.96   | Yes         | Tibial Artery | CEP68 |                                |                                | 5.80x10 <sup>-06</sup> |
|                   |                |             |                                 |      |        | Yes         | Heart, LA     | CEP68 | 1.22 (1.17-1.27)               | increase                       | 8.93x10 <sup>-13</sup> |
|                   | C              | rs58342673  | 68170                           | 0.79 | 0.96   | Yes         | Tibial Artery | CEP68 |                                |                                | 8.30x10 <sup>-06</sup> |
|                   |                |             |                                 |      |        | Yes         | Heart, LA     | CEP68 | 1.21 (1.16-1.26)               | increase                       | 1.28x10 <sup>-12</sup> |
|                   | A              | rs2723067   | 1463                            | 0.79 | 0.92   | Yes         | Heart, LA     | CEP68 | 1.16 (1.12-1.21)               | increase                       | 6.50x10 <sup>-09</sup> |
|                   | A              | rs11893423  | 71535                           | 0.76 | 0.96   | Yes         | Heart, LA     | CEP68 | 1.23 (1.18-1.28)               | increase                       | 9.75x10 <sup>-14</sup> |
|                   | C              | rs2241161   | 11428                           | 0.74 | 0.96   | Yes         | Heart, LA     | CEP68 | 1.19 (1.14-1.24)               | increase                       | 1.08x10 <sup>-11</sup> |
|                   | A              | rs2241160   | 12132                           | 0.74 | 0.96   | Yes         | Heart, LA     | CEP68 | 1.19 (1.14-1.24)               | increase                       | 3.16x10 <sup>-11</sup> |
|                   | T              | rs6736728   | 26085                           | 0.73 | 0.96   | Yes         | Tibial Artery | CEP68 |                                |                                | 1.17x10 <sup>-04</sup> |
|                   |                |             |                                 |      |        | Yes         | Heart, LA     | CEP68 | 1.23 (1.18-1.28)               | increase                       | 5.86x10 <sup>-14</sup> |
|                   | T              | rs6741255   | 27491                           | 0.73 | 0.96   | Yes         | Tibial Artery | CEP68 |                                |                                | 1.06x10 <sup>-04</sup> |
|                   |                |             |                                 |      |        | Yes         | Heart, LA     | CEP68 | 1.23 (1.18-1.28)               | increase                       | 5.94x10 <sup>-14</sup> |
|                   | C              | rs1420183   | 30574                           | 0.73 | 0.96   | Yes         | Tibial Artery | CEP68 |                                |                                | 1.06x10 <sup>-04</sup> |
|                   |                |             |                                 |      |        | Yes         | Heart, LA     | CEP68 | 1.23 (1.18-1.28)               | increase                       | 6.07x10 <sup>-14</sup> |
|                   | T              | rs1228      | 32141                           | 0.73 | 0.96   | Yes         | Tibial Artery | CEP68 |                                |                                | 9.40x10 <sup>-05</sup> |
|                   |                |             |                                 |      |        | Yes         | Heart, LA     | CEP68 | 1.23 (1.18-1.28)               | increase                       | 6.08x10 <sup>-14</sup> |
|                   | C              | rs1420184   | 36466                           | 0.73 | 0.96   | Yes         | Tibial Artery | CEP68 |                                |                                | 1.06x10 <sup>-04</sup> |
|                   |                |             |                                 |      |        | Yes         | Heart, LA     | CEP68 | 1.23 (1.18-1.28)               | increase                       | 6.07x10 <sup>-14</sup> |
|                   | C              | rs6713746   | 45078                           | 0.73 | 0.96   | Yes         | Tibial Artery | CEP68 |                                |                                | 1.06x10 <sup>-04</sup> |
|                   |                |             |                                 |      |        | Yes         | Heart, LA     | CEP68 | 1.23 (1.18-1.28)               | increase                       | 6.01x10 <sup>-14</sup> |
|                   | A              | rs17040050  | 47628                           | 0.73 | 0.96   | Yes         | Tibial Artery | CEP68 |                                |                                | 1.06x10 <sup>-04</sup> |
|                   |                |             |                                 |      |        | Yes         | Heart, LA     | CEP68 | 1.23 (1.18-1.28)               | increase                       | 6.00x10 <sup>-14</sup> |
|                   | G              | rs2302631   | 52245                           | 0.73 | 0.96   | Yes         | Tibial Artery | CEP68 |                                |                                | 1.06x10 <sup>-04</sup> |
|                   |                |             |                                 |      |        | Yes         | Heart, LA     | CEP68 | 1.22 (1.17-1.28)               | increase                       | 2.02x10 <sup>-13</sup> |
|                   | C              | rs9797989   | 57115                           | 0.73 | 0.96   | Yes         | Heart, LA     | CEP68 | 1.22 (1.17-1.28)               | increase                       | 2.02x10 <sup>-13</sup> |
|                   | C              | rs11126028  | 58736                           | 0.73 | 0.96   | Yes         | Heart, LA     | CEP68 | 1.22 (1.17-1.28)               | increase                       | 2.02x10 <sup>-13</sup> |
|                   | T              | rs11126029  | 58850                           | 0.73 | 0.96   | Yes         | Heart, LA     | CEP68 | 1.22 (1.17-1.28)               | increase                       | 2.44x10 <sup>-13</sup> |
|                   | A              | rs60136636  | 59008                           | 0.73 | 0.96   | Yes         | Tibial Artery | CEP68 |                                |                                | 6.82x10 <sup>-07</sup> |
|                   |                |             |                                 |      |        | Yes         | Heart, LA     | CEP68 | 1.22 (1.17-1.27)               | increase                       | 8.91x10 <sup>-13</sup> |
|                   | A              | rs6756585   | 60656                           | 0.73 | 0.96   | Yes         | Heart, LA     | CEP68 | 1.22 (1.17-1.28)               | increase                       | 2.02x10 <sup>-13</sup> |
|                   | A              | rs2052261   | 75856                           | 0.73 | 0.96   | Yes         | Tibial Artery | CEP68 |                                |                                | 9.40x10 <sup>-05</sup> |
|                   |                |             |                                 |      |        | Yes         | Heart, LA     | CEP68 | 1.23 (1.18-1.28)               | increase                       | 6.01x10 <sup>-14</sup> |
|                   | T              | rs10185243  | 76330                           | 0.73 | 0.96   | Yes         | Tibial Artery | CEP68 |                                |                                | 1.56x10 <sup>-05</sup> |
|                   |                |             |                                 |      |        | Yes         | Heart, LA     | CEP68 | 1.22 (1.17-1.27)               | increase                       | 6.78x10 <sup>-13</sup> |
|                   | C              | rs12713532  | 77138                           | 0.73 | 0.96   | Yes         | Tibial Artery | CEP68 |                                |                                | 1.16x10 <sup>-04</sup> |
|                   |                |             |                                 |      |        | Yes         | Heart, LA     | CEP68 | 1.23 (1.17-1.28)               | increase                       | 7.63x10 <sup>-14</sup> |
|                   | C              | rs2723091   | 22603                           | 0.7  | 0.95   | Yes         | Tibial Artery | CEP68 |                                |                                | 1.04x10 <sup>-04</sup> |
|                   |                |             |                                 |      |        | Yes         | Heart, LA     | CEP68 | 1.23 (1.18-1.28)               | increase                       | 5.63x10 <sup>-14</sup> |
|                   | T              | rs1050676   | 31417                           | 0.69 | 0.91   | Yes         | Tibial Artery | CEP68 |                                |                                | 1.06x10 <sup>-04</sup> |
|                   |                |             |                                 |      |        | Yes         | Heart, LA     | CEP68 | 1.23 (1.18-1.28)               | increase                       | 6.08x10 <sup>-14</sup> |
|                   | T              | rs6730986   | 74135                           | 0.69 | 0.91   | Yes         | Tibial Artery | CEP68 |                                |                                | 9.40x10 <sup>-05</sup> |
|                   |                |             |                                 |      |        | Yes         | Heart, LA     | CEP68 | 1.23 (1.18-1.28)               | increase                       | 6.02x10 <sup>-14</sup> |
|                   | C              | rs6546123   | 24168                           | 0.65 | 0.81   | Yes         | Tibial Artery | CEP68 |                                |                                | 5.92x10 <sup>-06</sup> |
|                   |                |             |                                 |      |        | Yes         | Heart, LA     | CEP68 | 1.22 (1.17-1.27)               | increase                       | 6.18x10 <sup>-13</sup> |
|                   | A              | rs1894875   | 84165                           | 0.64 | 0.95   | Yes         | Tibial Artery | CEP68 |                                |                                | 9.75x10 <sup>-06</sup> |
|                   |                |             |                                 |      |        | Yes         | Heart, LA     | CEP68 | 1.17 (1.12-1.22)               | increase                       | 9.97x10 <sup>-09</sup> |
|                   | G              | rs2422441   | 91352                           | 0.64 | 0.95   | Yes         | Tibial Artery | CEP68 |                                |                                | 4.44x10 <sup>-06</sup> |
|                   |                |             |                                 |      |        | Yes         | Heart, LA     | CEP68 | 1.16 (1.11-1.22)               | increase                       | 3.59x10 <sup>-08</sup> |
|                   | T              | rs10205598  | 99837                           | 0.64 | 0.95   | Yes         | Tibial Artery | CEP68 |                                |                                | 2.27x10 <sup>-06</sup> |
|                   |                |             |                                 |      |        | Yes         | Heart, LA     | CEP68 | 1.17 (1.12-1.22)               | increase                       | 3.03x10 <sup>-08</sup> |
|                   | C              | rs7559813   | 1391                            | 0.62 | 1      | Yes         | Heart, LA     | CEP68 | 1.17 (1.12-1.23)               | increase                       | 6.00x10 <sup>-08</sup> |
|                   | G              | rs71424153  | 1480                            | 0.62 | 1      | Yes         | Heart, LA     | CEP68 | 1.17 (1.12-1.23)               | increase                       | 6.05x10 <sup>-08</sup> |
|                   | C              | rs12990465  | 1987                            | 0.62 | 1      | Yes         | Heart, LA     | CEP68 | 1.17 (1.12-1.23)               | increase                       | 5.69x10 <sup>-08</sup> |
|                   | G              | rs6728523   | 3294                            | 0.62 | 1      | Yes         | Heart, LA     | CEP68 | 1.17 (1.12-1.23)               | increase                       | 6.07x10 <sup>-08</sup> |
|                   | G              | rs2302647   | 3760                            | 0.62 | 1      | Yes         | Heart, LA     | CEP68 | 1.17 (1.12-1.23)               | increase                       | 6.07x10 <sup>-08</sup> |
|                   | T              | rs2422437   | 78915                           | 0.61 | 0.95   | Yes         | Heart, LA     | CEP68 | 1.19 (1.13-1.24)               | increase                       | 1.07x10 <sup>-09</sup> |
|                   |                | rs10197530  | 76190                           | 0.6  | 0.83   | No          |               |       |                                |                                |                        |
|                   | G              | rs6748462   | 79868                           | 0.6  | 0.9    | Yes         | Tibial Artery | CEP68 |                                |                                | 3.56x10 <sup>-05</sup> |
|                   |                |             |                                 |      |        | Yes         | Heart, LA     | CEP68 | 1.17 (1.12-1.23)               | increase                       | 6.93x10 <sup>-09</sup> |
|                   | T              | rs3732096   | 78669                           | 0.58 | 0.95   | Yes         | Heart, LA     | CEP68 | 1.19 (1.14-1.24)               | increase                       | 1.05x10 <sup>-09</sup> |
|                   | T              | rs12713533  | 85288                           | 0.58 | 0.95   | Yes         | Heart, LA     | CEP68 | 1.19 (1.14-1.24)               | increase                       | 1.17x10 <sup>-09</sup> |
|                   | A              | rs6705891   | 88681                           | 0.58 | 0.95   | Yes         | Heart, LA     | CEP68 | 1.19 (1.13-1.24)               | increase                       | 1.62x10 <sup>-09</sup> |
|                   | G              | rs11678917  | 88800                           | 0.58 | 0.95   | Yes         | Heart, LA     | CEP68 | 1.18 (1.13-1.24)               | increase                       | 2.28x10 <sup>-09</sup> |
|                   |                | rs113605762 | 89254                           | 0.58 | 0.95   | No          |               |       |                                |                                |                        |
|                   | C              | rs984748    | 90550                           | 0.58 | 0.95   | Yes         | Tibial Artery | CEP68 |                                |                                | 6.58x10 <sup>-05</sup> |

**Supplemental Table 8. eQTL analyses using the Genotype-Tissue Expression Portal (GTEx) and Cleveland Clinic Atrial Tissue Bank.**

**Europeans**

| Sentinel SNP      | AF Risk Allele | Proxy SNP  | Distance from Sentinel SNP (bp) | r2   | DPrime | eQTL Yes/No | Tissue          | Gene       | fold change per AF risk allele | Direction of expression change | P value                |
|-------------------|----------------|------------|---------------------------------|------|--------|-------------|-----------------|------------|--------------------------------|--------------------------------|------------------------|
|                   |                |            |                                 |      |        | Yes         | Heart, LA       | CEP68      | 1.18 (1.13-1.24)               | increase                       | 3.11x10 <sup>-09</sup> |
|                   | T              | rs10173422 | 92137                           | 0.58 | 0.95   | Yes         | Heart, LA       | CEP68      | 1.18 (1.13-1.24)               | increase                       | 2.24x10 <sup>-09</sup> |
| rs2723065 (cont.) | A              | rs10173678 | 92243                           | 0.58 | 0.95   | Yes         | Heart, LA       | CEP68      | 1.19 (1.13-1.24)               | increase                       | 2.21x10 <sup>-09</sup> |
|                   | C              | rs7585500  | 92923                           | 0.58 | 0.95   | Yes         | Heart, LA       | CEP68      | 1.18 (1.13-1.24)               | increase                       | 2.83x10 <sup>-09</sup> |
|                   | A              | rs6546128  | 94713                           | 0.58 | 0.95   | Yes         | Heart, LA       | CEP68      | 1.19 (1.13-1.24)               | increase                       | 1.93x10 <sup>-09</sup> |
|                   | T              | rs6751786  | 95181                           | 0.58 | 0.95   | Yes         | Tibial Artery   | CEP68      |                                |                                | 7.00x10 <sup>-05</sup> |
|                   |                |            |                                 |      |        | Yes         | Heart, LA       | CEP68      | 1.19 (1.13-1.24)               | increase                       | 5.15x10 <sup>-09</sup> |
|                   | T              | rs6722972  | 95182                           | 0.58 | 0.95   | Yes         | Tibial Artery   | CEP68      |                                |                                | 7.56x10 <sup>-05</sup> |
|                   |                |            |                                 |      |        | Yes         | Heart, LA       | CEP68      | 1.19 (1.13-1.24)               | increase                       | 6.34x10 <sup>-09</sup> |
|                   | C              | rs7603736  | 96064                           | 0.58 | 0.95   | Yes         | Tibial Artery   | CEP68      |                                |                                | 6.58x10 <sup>-05</sup> |
|                   |                |            |                                 |      |        | Yes         | Heart, LA       | CEP68      | 1.19 (1.13-1.24)               | increase                       | 2.68x10 <sup>-09</sup> |
|                   | A              | rs11888531 | 97727                           | 0.58 | 0.95   | Yes         | Heart, LA       | CEP68      | 1.19 (1.14-1.24)               | increase                       | 1.98x10 <sup>-09</sup> |
|                   | C              | rs6546131  | 98717                           | 0.58 | 0.95   | Yes         | Tibial Artery   | CEP68      |                                |                                | 4.54x10 <sup>-05</sup> |
|                   |                |            |                                 |      |        | Yes         | Heart, LA       | CEP68      | 1.19 (1.13-1.24)               | increase                       | 2.79x10 <sup>-09</sup> |
|                   | C              | rs7563881  | 106178                          | 0.58 | 0.95   | Yes         | Heart, LA       | CEP68      | 1.17 (1.12-1.23)               | increase                       | 1.52x10 <sup>-07</sup> |
|                   | G              | rs4671119  | 82797                           | 0.57 | 0.9    | Yes         | Heart, LA       | CEP68      | 1.19 (1.14-1.24)               | increase                       | 9.33x10 <sup>-11</sup> |
|                   | G              | rs11684110 | 88876                           | 0.56 | 0.86   | Yes         | Tibial Artery   | CEP68      |                                |                                | 1.66x10 <sup>-05</sup> |
|                   |                |            |                                 |      |        | Yes         | Heart, LA       | CEP68      | 1.17 (1.12-1.22)               | increase                       | 1.53x10 <sup>-08</sup> |
|                   | T              | rs11126031 | 100943                          | 0.56 | 0.82   | Yes         | Heart, LA       | CEP68      | 1.19 (1.13-1.24)               | increase                       | 2.89x10 <sup>-09</sup> |
|                   | T              | rs4671638  | 32803                           | 0.55 | 0.94   | Yes         | Heart, LA       | CEP68      | 1.18 (1.12-1.23)               | increase                       | 1.26x10 <sup>-08</sup> |
|                   | T              | rs9989843  | 102847                          | 0.54 | 0.89   | Yes         | Tibial Artery   | CEP68      |                                |                                | 3.78x10 <sup>-05</sup> |
|                   |                |            |                                 |      |        | Yes         | Heart, LA       | CEP68      | 1.17 (1.12-1.23)               | increase                       | 3.52x10 <sup>-08</sup> |
|                   | G              | rs6750146  | 104794                          | 0.54 | 0.89   | Yes         | Tibial Artery   | CEP68      |                                |                                | 1.02x10 <sup>-04</sup> |
|                   |                |            |                                 |      |        | Yes         | Heart, LA       | CEP68      | 1.18 (1.12-1.23)               | increase                       | 4.66x10 <sup>-08</sup> |
|                   | C              | rs4671118  | 82755                           | 0.54 | 0.89   | Yes         | Heart, LA       | CEP68      | 1.19 (1.14-1.24)               | increase                       | 9.35x10 <sup>-10</sup> |
|                   | G              | rs12472873 | 95907                           | 0.54 | 0.89   | Yes         | Tibial Artery   | CEP68      |                                |                                | 6.58x10 <sup>-05</sup> |
|                   |                |            |                                 |      |        | Yes         | Heart, LA       | CEP68      | 1.19 (1.13-1.24)               | increase                       | 2.67x10 <sup>-09</sup> |
|                   | T              | rs2540970  | 24315                           | 0.54 | 0.89   | Yes         | Thyroid         | AC008074.4 |                                |                                | 1.15x10 <sup>-04</sup> |
|                   |                |            |                                 |      |        | Yes         | Heart, LA       | CEP68      | 1.13 (1.08-1.18)               | increase                       | 3.53x10 <sup>-06</sup> |
|                   |                | rs2540971  | 27029                           | 0.54 | 0.89   | No          |                 |            |                                |                                |                        |
|                   | G              | rs2080385  | 13348                           | 0.52 | 0.94   | Yes         | Whole Blood     | CEP68      |                                |                                | 1.10x10 <sup>-05</sup> |
|                   |                |            |                                 |      |        | Yes         | Heart, LA       | CEP68      | 1.18 (1.12-1.23)               | increase                       | 2.50x10 <sup>-08</sup> |
|                   | A              | rs4671120  | 91698                           | 0.5  | 0.85   | Yes         | Heart, LA       | CEP68      | 1.18 (1.13-1.24)               | increase                       | 2.34x10 <sup>-09</sup> |
|                   | T              | rs10195785 | 104113                          | 0.5  | 0.72   | Yes         | Heart, LA       | CEP68      | 1.15 (1.10-1.21)               | increase                       | 4.42x10 <sup>-07</sup> |
| rs276857          | G              | rs276857   | 0                               | 1    | 1      | No          |                 |            |                                |                                |                        |
| rs3780190         | G              | rs3780190  | 0                               | 1    | 1      | No          |                 |            |                                |                                |                        |
| rs3922843         | A              | rs3922843  | 0                               | 1    | 1      | Yes         | Skeletal Muscle | XIPR1      |                                | decrease                       | 7.15x10 <sup>-5</sup>  |
| rs4238314         | A              | rs4238314  | 0                               | 1    | 1      | No          |                 |            |                                |                                |                        |
| rs4642101         | G              | rs4642101  | 0                               | 1    | 1      | Yes         | Skeletal Muscle | CAND2      |                                | increase                       | 2.57x10 <sup>-09</sup> |
|                   |                |            |                                 |      |        | Yes         | Skeletal Muscle | KRT18P17   |                                | increase                       | 3.46x10 <sup>-06</sup> |
|                   |                | rs7650482  | 419                             | 1    | 1      | Yes         | Skeletal Muscle | CAND2      |                                |                                | 1.74x10 <sup>-10</sup> |
|                   |                |            |                                 |      |        | Yes         | Skeletal Muscle | KRT18P17   |                                |                                | 5.32x10 <sup>-06</sup> |
|                   |                | rs6810325  | 1289                            | 0.88 | 1      | Yes         | Skeletal Muscle | CAND2      |                                |                                | 3.25x10 <sup>-09</sup> |
|                   |                |            |                                 |      |        | Yes         | Skeletal Muscle | KRT18P17   |                                |                                | 5.96x10 <sup>-06</sup> |
|                   |                | rs11718898 | 6599                            | 0.88 | 1      | Yes         | Skeletal Muscle | CAND2      |                                |                                | 1.63x10 <sup>-10</sup> |
|                   |                |            |                                 |      |        | Yes         | Skeletal Muscle | KRT18P17   |                                |                                | 2.99x10 <sup>-06</sup> |
|                   |                | rs9873475  | 3199                            | 0.86 | 1      | Yes         | Skeletal Muscle | CAND2      |                                |                                | 4.04x10 <sup>-14</sup> |
|                   |                |            |                                 |      |        | Yes         | Thyroid         | CAND2      |                                |                                | 1.22x10 <sup>-04</sup> |
|                   |                |            |                                 |      |        | Yes         | Skeletal Muscle | KRT18P17   |                                |                                | 2.43x10 <sup>-09</sup> |
|                   |                | rs9836128  | 3203                            | 0.86 | 1      | Yes         | Skeletal Muscle | CAND2      |                                |                                | 4.04x10 <sup>-14</sup> |
|                   |                |            |                                 |      |        | Yes         | Thyroid         | CAND2      |                                |                                | 1.22x10 <sup>-04</sup> |
|                   |                |            |                                 |      |        | Yes         | Skeletal Muscle | KRT18P17   |                                |                                | 2.43x10 <sup>-09</sup> |
|                   |                | rs9820977  | 709                             | 0.82 | 1      | Yes         | Skeletal Muscle | CAND2      |                                |                                | 4.09x10 <sup>-14</sup> |
|                   |                |            |                                 |      |        | Yes         | Thyroid         | CAND2      |                                |                                | 1.22x10 <sup>-04</sup> |
|                   |                |            |                                 |      |        | Yes         | Skeletal Muscle | KRT18P17   |                                |                                | 2.24x10 <sup>-09</sup> |
|                   |                | rs9825233  | 1145                            | 0.82 | 1      | Yes         | Skeletal Muscle | CAND2      |                                |                                | 4.08x10 <sup>-14</sup> |
|                   |                |            |                                 |      |        | Yes         | Thyroid         | CAND2      |                                |                                | 1.22x10 <sup>-04</sup> |
|                   |                |            |                                 |      |        | Yes         | Skeletal Muscle | KRT18P17   |                                |                                | 2.27x10 <sup>-09</sup> |
|                   |                | rs11717013 | 1639                            | 0.82 | 1      | Yes         | Skeletal Muscle | CAND2      |                                |                                | 4.07x10 <sup>-14</sup> |
|                   |                |            |                                 |      |        | Yes         | Thyroid         | CAND2      |                                |                                | 1.22x10 <sup>-04</sup> |
|                   |                |            |                                 |      |        | Yes         | Skeletal Muscle | KRT18P17   |                                |                                | 2.31x10 <sup>-09</sup> |
|                   |                | rs3889514  | 1849                            | 0.82 | 1      | Yes         | Skeletal Muscle | CAND2      |                                |                                | 4.06x10 <sup>-14</sup> |
|                   |                |            |                                 |      |        | Yes         | Thyroid         | CAND2      |                                |                                | 1.22x10 <sup>-04</sup> |
|                   |                |            |                                 |      |        | Yes         | Skeletal Muscle | KRT18P17   |                                |                                | 2.33x10 <sup>-09</sup> |
|                   |                | rs3889515  | 1889                            | 0.82 | 1      | Yes         | Skeletal Muscle | CAND2      |                                |                                | 4.06x10 <sup>-14</sup> |
|                   |                |            |                                 |      |        | Yes         | Thyroid         | CAND2      |                                |                                | 1.22x10 <sup>-04</sup> |
|                   |                |            |                                 |      |        | Yes         | Skeletal Muscle | KRT18P17   |                                |                                | 2.34x10 <sup>-09</sup> |
|                   |                | rs9835677  | 2935                            | 0.82 | 1      | Yes         | Skeletal Muscle | CAND2      |                                |                                | 4.04x10 <sup>-14</sup> |
|                   |                |            |                                 |      |        | Yes         | Thyroid         | CAND2      |                                |                                | 1.22x10 <sup>-04</sup> |
|                   |                |            |                                 |      |        | Yes         | Skeletal Muscle | KRT18P17   |                                |                                | 2.43x10 <sup>-09</sup> |
|                   |                | rs9852222  | 6268                            | 0.82 | 1      | Yes         | Skeletal Muscle | CAND2      |                                |                                | 4.12x10 <sup>-14</sup> |
|                   |                |            |                                 |      |        | Yes         | Thyroid         | CAND2      |                                |                                | 1.21x10 <sup>-04</sup> |
|                   |                |            |                                 |      |        | Yes         | Skeletal Muscle | KRT18P17   |                                |                                | 2.42x10 <sup>-09</sup> |
|                   |                | rs3889513  | 1847                            | 0.79 | 1      | Yes         | Skeletal Muscle | CAND2      |                                |                                | 4.06x10 <sup>-14</sup> |
|                   |                |            |                                 |      |        | Yes         | Thyroid         | CAND2      |                                |                                | 1.22x10 <sup>-04</sup> |
|                   |                |            |                                 |      |        | Yes         | Skeletal Muscle | KRT18P17   |                                |                                | 2.33x10 <sup>-09</sup> |
|                   | T              | rs56082700 | 8390                            | 0.79 | 1      | No          |                 |            |                                |                                |                        |
|                   |                | rs13086170 | 9619                            | 0.79 | 1      | Yes         | Skeletal Muscle | CAND2      |                                |                                | 9.14x10 <sup>-11</sup> |
|                   |                |            |                                 |      |        | Yes         | Skeletal Muscle | KRT18P17   |                                |                                | 1.90x10 <sup>-05</sup> |

**Supplemental Table 8. eQTL analyses using the Genotype-Tissue Expression Portal (GTEx) and Cleveland Clinic Atrial Tissue Bank.**

**Europeans**

| Sentinel SNP      | AF Risk Allele | Proxy SNP  | Distance from Sentinel SNP (bp) | r2   | DPrime | eQTL Yes/No | Tissue          | Gene     | fold change per AF risk allele | Direction of expression change | P value                |
|-------------------|----------------|------------|---------------------------------|------|--------|-------------|-----------------|----------|--------------------------------|--------------------------------|------------------------|
|                   |                | rs12714880 | 10122                           | 0.79 | 1      | Yes         | Skeletal Muscle | CAND2    |                                |                                | 3.12x10 <sup>-12</sup> |
|                   |                |            |                                 |      |        | Yes         | Skeletal Muscle | KRT18P17 |                                |                                | 1.66x10 <sup>-05</sup> |
| rs4642101 (cont.) |                | rs6799179  | 13128                           | 0.79 | 1      | Yes         | Skeletal Muscle | CAND2    |                                |                                | 3.13x10 <sup>-12</sup> |
|                   |                |            |                                 |      |        | Yes         | Skeletal Muscle | KRT18P17 |                                |                                | 2.37x10 <sup>-05</sup> |
|                   |                | rs6763619  | 20076                           | 0.79 | 1      | Yes         | Skeletal Muscle | CAND2    |                                |                                | 2.82x10 <sup>-10</sup> |
|                   |                |            |                                 |      |        | Yes         | Skeletal Muscle | KRT18P17 |                                |                                | 1.14x10 <sup>-05</sup> |
|                   |                | rs13320486 | 20154                           | 0.79 | 1      | Yes         | Skeletal Muscle | CAND2    |                                |                                | 2.82x10 <sup>-10</sup> |
|                   |                |            |                                 |      |        | Yes         | Skeletal Muscle | KRT18P17 |                                |                                | 1.13x10 <sup>-05</sup> |
|                   |                | rs9870269  | 11227                           | 0.77 | 1      | Yes         | Skeletal Muscle | CAND2    |                                |                                | 9.19x10 <sup>-13</sup> |
|                   |                |            |                                 |      |        | Yes         | Skeletal Muscle | KRT18P17 |                                |                                | 3.47x10 <sup>-05</sup> |
|                   |                | rs1985428  | 12908                           | 0.77 | 1      | Yes         | Skeletal Muscle | CAND2    |                                |                                | 8.66x10 <sup>-11</sup> |
|                   |                |            |                                 |      |        | Yes         | Skeletal Muscle | KRT18P17 |                                |                                | 1.83x10 <sup>-05</sup> |
|                   |                | rs9871991  | 14698                           | 0.77 | 1      | Yes         | Skeletal Muscle | CAND2    |                                |                                | 1.02x10 <sup>-10</sup> |
|                   |                |            |                                 |      |        | Yes         | Skeletal Muscle | KRT18P17 |                                |                                | 5.63x10 <sup>-05</sup> |
|                   |                | rs9872103  | 14771                           | 0.77 | 1      | Yes         | Skeletal Muscle | CAND2    |                                |                                | 1.40x10 <sup>-10</sup> |
|                   |                |            |                                 |      |        | Yes         | Skeletal Muscle | KRT18P17 |                                |                                | 7.48x10 <sup>-06</sup> |
|                   |                | rs6791647  | 15798                           | 0.77 | 1      | Yes         | Skeletal Muscle | CAND2    |                                |                                | 1.18x10 <sup>-11</sup> |
|                   |                |            |                                 |      |        | Yes         | Skeletal Muscle | KRT18P17 |                                |                                | 6.18x10 <sup>-06</sup> |
|                   |                | rs3732675  | 15805                           | 0.77 | 1      | Yes         | Skeletal Muscle | CAND2    |                                |                                | 4.84x10 <sup>-13</sup> |
|                   |                |            |                                 |      |        | Yes         | Skeletal Muscle | KRT18P17 |                                |                                | 2.69x10 <sup>-05</sup> |
|                   |                | rs4321514  | 16322                           | 0.77 | 1      | Yes         | Skeletal Muscle | CAND2    |                                |                                | 2.91x10 <sup>-10</sup> |
|                   |                |            |                                 |      |        | Yes         | Skeletal Muscle | KRT18P17 |                                |                                | 1.29x10 <sup>-05</sup> |
|                   |                | rs3901665  | 17613                           | 0.77 | 1      | Yes         | Skeletal Muscle | CAND2    |                                |                                | 2.91x10 <sup>-10</sup> |
|                   |                |            |                                 |      |        | Yes         | Skeletal Muscle | KRT18P17 |                                |                                | 1.29x10 <sup>-05</sup> |
|                   |                | rs9877165  | 13726                           | 0.74 | 1      | Yes         | Skeletal Muscle | CAND2    |                                |                                | 8.73x10 <sup>-11</sup> |
|                   |                |            |                                 |      |        | Yes         | Skeletal Muscle | KRT18P17 |                                |                                | 1.87x10 <sup>-05</sup> |
|                   |                | rs6767504  | 15556                           | 0.74 | 1      | Yes         | Skeletal Muscle | CAND2    |                                |                                | 2.90x10 <sup>-10</sup> |
|                   |                |            |                                 |      |        | Yes         | Skeletal Muscle | KRT18P17 |                                |                                | 1.29x10 <sup>-05</sup> |
|                   |                | rs4299468  | 16664                           | 0.74 | 1      | Yes         | Skeletal Muscle | CAND2    |                                |                                | 3.01x10 <sup>-10</sup> |
|                   |                |            |                                 |      |        | Yes         | Skeletal Muscle | KRT18P17 |                                |                                | 1.32x10 <sup>-05</sup> |
|                   |                | rs4447735  | 16710                           | 0.74 | 1      | Yes         | Skeletal Muscle | CAND2    |                                |                                | 3.44x10 <sup>-12</sup> |
|                   |                |            |                                 |      |        | Yes         | Skeletal Muscle | KRT18P17 |                                |                                | 7.12x10 <sup>-05</sup> |
|                   |                | rs12631514 | 3930                            | 0.69 | 0.95   | Yes         | Skeletal Muscle | CAND2    |                                |                                | 2.87x10 <sup>-16</sup> |
|                   |                |            |                                 |      |        | Yes         | Thyroid         | CAND2    |                                |                                | 2.92x10 <sup>-05</sup> |
|                   |                |            |                                 |      |        | Yes         | Skeletal Muscle | KRT18P17 |                                |                                | 1.07x10 <sup>-08</sup> |
|                   |                | rs13085726 | 9551                            | 0.69 | 1      | Yes         | Skeletal Muscle | CAND2    |                                |                                | 1.56x10 <sup>-16</sup> |
|                   |                |            |                                 |      |        | Yes         | Thyroid         | CAND2    |                                |                                | 1.08x10 <sup>-05</sup> |
|                   |                |            |                                 |      |        | Yes         | Skeletal Muscle | KRT18P17 |                                |                                | 6.82x10 <sup>-08</sup> |
|                   |                | rs9822382  | 13395                           | 0.69 | 1      | Yes         | Skeletal Muscle | CAND2    |                                |                                | 8.73x10 <sup>-11</sup> |
|                   |                |            |                                 |      |        | Yes         | Skeletal Muscle | KRT18P17 |                                |                                | 1.87x10 <sup>-05</sup> |
|                   |                | rs6442330  | 21722                           | 0.68 | 0.91   | Yes         | Skeletal Muscle | CAND2    |                                |                                | 7.29x10 <sup>-12</sup> |
|                   |                |            |                                 |      |        | Yes         | Skeletal Muscle | KRT18P17 |                                |                                | 3.82x10 <sup>-05</sup> |
|                   |                | rs7626609  | 36143                           | 0.68 | 0.91   | Yes         | Skeletal Muscle | CAND2    |                                |                                | 2.84x10 <sup>-07</sup> |
|                   |                |            |                                 |      |        | Yes         | Thyroid         | CAND2    |                                |                                | 1.10x10 <sup>-05</sup> |
|                   |                | rs1467026  | 11448                           | 0.67 | 0.87   | Yes         | Skeletal Muscle | CAND2    |                                |                                | 7.76x10 <sup>-12</sup> |
|                   |                |            |                                 |      |        | Yes         | Skeletal Muscle | KRT18P17 |                                |                                | 4.48x10 <sup>-05</sup> |
|                   |                | rs4034942  | 5431                            | 0.66 | 1      | Yes         | Skeletal Muscle | CAND2    |                                |                                | 1.82x10 <sup>-18</sup> |
|                   |                |            |                                 |      |        | Yes         | Thyroid         | CAND2    |                                |                                | 3.92x10 <sup>-05</sup> |
|                   |                |            |                                 |      |        | Yes         | Skeletal Muscle | KRT18P17 |                                |                                | 4.16x10 <sup>-07</sup> |
|                   |                | rs9874893  | 9144                            | 0.66 | 1      | Yes         | Skeletal Muscle | CAND2    |                                |                                | 3.15x10 <sup>-16</sup> |
|                   |                |            |                                 |      |        | Yes         | Thyroid         | CAND2    |                                |                                | 3.32x10 <sup>-05</sup> |
|                   |                |            |                                 |      |        | Yes         | Skeletal Muscle | KRT18P17 |                                |                                | 6.35x10 <sup>-08</sup> |
|                   |                | rs1969154  | 13067                           | 0.66 | 1      | Yes         | Skeletal Muscle | CAND2    |                                |                                | 3.13x10 <sup>-12</sup> |
|                   |                |            |                                 |      |        | Yes         | Skeletal Muscle | KRT18P17 |                                |                                | 2.37x10 <sup>-05</sup> |
|                   |                | rs3901664  | 17563                           | 0.66 | 1      | Yes         | Skeletal Muscle | CAND2    |                                |                                | 1.76x10 <sup>-16</sup> |
|                   |                |            |                                 |      |        | Yes         | Thyroid         | CAND2    |                                |                                | 4.64x10 <sup>-05</sup> |
|                   |                |            |                                 |      |        | Yes         | Skeletal Muscle | KRT18P17 |                                |                                | 6.23x10 <sup>-08</sup> |
|                   |                | rs9840766  | 20353                           | 0.66 | 1      | Yes         | Skeletal Muscle | CAND2    |                                |                                | 4.67x10 <sup>-16</sup> |
|                   |                |            |                                 |      |        | Yes         | Thyroid         | CAND2    |                                |                                | 3.54x10 <sup>-05</sup> |
|                   |                |            |                                 |      |        | Yes         | Skeletal Muscle | KRT18P17 |                                |                                | 1.14x10 <sup>-07</sup> |
|                   |                | rs57411588 | 21839                           | 0.66 | 1      | Yes         | Skeletal Muscle | CAND2    |                                |                                | 9.96x10 <sup>-17</sup> |
|                   |                |            |                                 |      |        | Yes         | Thyroid         | CAND2    |                                |                                | 1.29x10 <sup>-04</sup> |
|                   |                |            |                                 |      |        | Yes         | Skeletal Muscle | KRT18P17 |                                |                                | 2.13x10 <sup>-08</sup> |
|                   |                | rs3732678  | 16781                           | 0.64 | 0.95   | Yes         | Skeletal Muscle | CAND2    |                                |                                | 2.47x10 <sup>-11</sup> |
|                   |                | rs7629354  | 14477                           | 0.64 | 0.87   | Yes         | Skeletal Muscle | CAND2    |                                |                                | 7.76x10 <sup>-12</sup> |
|                   |                |            |                                 |      |        | Yes         | Skeletal Muscle | KRT18P17 |                                |                                | 4.48x10 <sup>-05</sup> |
|                   |                | rs2305398  | 14633                           | 0.64 | 0.87   | Yes         | Skeletal Muscle | CAND2    |                                |                                | 1.91x10 <sup>-11</sup> |
|                   |                |            |                                 |      |        | Yes         | Skeletal Muscle | KRT18P17 |                                |                                | 7.07x10 <sup>-05</sup> |
|                   |                | rs12629398 | 15424                           | 0.64 | 1      | Yes         | Skeletal Muscle | CAND2    |                                |                                | 1.73x10 <sup>-16</sup> |
|                   |                |            |                                 |      |        | Yes         | Thyroid         | CAND2    |                                |                                | 4.76x10 <sup>-05</sup> |
|                   |                |            |                                 |      |        | Yes         | Skeletal Muscle | KRT18P17 |                                |                                | 5.44x10 <sup>-08</sup> |
|                   |                | rs731646   | 15600                           | 0.64 | 1      | Yes         | Skeletal Muscle | CAND2    |                                |                                | 5.68x10 <sup>-18</sup> |
|                   |                |            |                                 |      |        | Yes         | Thyroid         | CAND2    |                                |                                | 3.11x10 <sup>-05</sup> |
|                   |                |            |                                 |      |        | Yes         | Skeletal Muscle | KRT18P17 |                                |                                | 5.14x10 <sup>-09</sup> |
|                   |                | rs3901666  | 17860                           | 0.64 | 0.87   | Yes         | Skeletal Muscle | CAND2    |                                |                                | 7.76x10 <sup>-12</sup> |
|                   |                |            |                                 |      |        | Yes         | Skeletal Muscle | KRT18P17 |                                |                                | 4.48x10 <sup>-05</sup> |
|                   |                | rs9877049  | 20992                           | 0.64 | 1      | Yes         | Skeletal Muscle | CAND2    |                                |                                | 2.64x10 <sup>-19</sup> |
|                   |                |            |                                 |      |        | Yes         | Thyroid         | CAND2    |                                |                                | 1.00x10 <sup>-05</sup> |
|                   |                |            |                                 |      |        | Yes         | Skeletal Muscle | KRT18P17 |                                |                                | 2.19x10 <sup>-08</sup> |

**Supplemental Table 8. eQTL analyses using the Genotype-Tissue Expression Portal (GTEx) and Cleveland Clinic Atrial Tissue Bank.**

**Europeans**

| Sentinel SNP      | AF Risk Allele | Proxy SNP  | Distance from Sentinel SNP (bp) | r2   | DPrime | eQTL Yes/No | Tissue          | Gene     | fold change per AF risk allele | Direction of expression change | P value                |
|-------------------|----------------|------------|---------------------------------|------|--------|-------------|-----------------|----------|--------------------------------|--------------------------------|------------------------|
|                   |                | rs9870433  | 11343                           | 0.64 | 0.86   | Yes         | Skeletal Muscle | CAND2    |                                |                                | 9.12x10 <sup>-13</sup> |
|                   | T              |            |                                 |      |        | Yes         | Skeletal Muscle | KRT18P17 |                                |                                | 3.48x10 <sup>-05</sup> |
| rs4642101 (cont.) |                | rs1003080  | 30595                           | 0.63 | 0.82   | Yes         | Skeletal Muscle | CAND2    |                                |                                | 1.77x10 <sup>-07</sup> |
|                   |                |            |                                 |      |        | Yes         | Thyroid         | CAND2    |                                |                                | 2.50x10 <sup>-06</sup> |
|                   |                | rs13086564 | 9370                            | 0.62 | 1      | Yes         | Skeletal Muscle | CAND2    |                                |                                | 6.36x10 <sup>-17</sup> |
|                   |                |            |                                 |      |        | Yes         | Thyroid         | CAND2    |                                |                                | 3.78x10 <sup>-05</sup> |
|                   |                |            |                                 |      |        | Yes         | Skeletal Muscle | KRT18P17 |                                |                                | 6.97x10 <sup>-08</sup> |
|                   |                | rs9877079  | 20936                           | 0.62 | 1      | Yes         | Skeletal Muscle | CAND2    |                                |                                | 7.75x10 <sup>-17</sup> |
|                   |                |            |                                 |      |        | Yes         | Thyroid         | CAND2    |                                |                                | 5.97x10 <sup>-05</sup> |
|                   |                |            |                                 |      |        | Yes         | Skeletal Muscle | KRT18P17 |                                |                                | 2.77x10 <sup>-08</sup> |
|                   |                | rs7612317  | 21665                           | 0.62 | 1      | Yes         | Skeletal Muscle | CAND2    |                                |                                | 3.67x10 <sup>-14</sup> |
|                   |                |            |                                 |      |        | Yes         | Skeletal Muscle | KRT18P17 |                                |                                | 2.83x10 <sup>-07</sup> |
|                   |                | rs60270583 | 21883                           | 0.62 | 1      | Yes         | Skeletal Muscle | CAND2    |                                |                                | 1.55x10 <sup>-15</sup> |
|                   |                |            |                                 |      |        | Yes         | Thyroid         | CAND2    |                                |                                | 7.00x10 <sup>-05</sup> |
|                   |                |            |                                 |      |        | Yes         | Skeletal Muscle | KRT18P17 |                                |                                | 2.49x10 <sup>-08</sup> |
|                   |                | rs11128614 | 23011                           | 0.62 | 1      | Yes         | Skeletal Muscle | CAND2    |                                |                                | 9.14x10 <sup>-18</sup> |
|                   |                |            |                                 |      |        | Yes         | Thyroid         | CAND2    |                                |                                | 7.36x10 <sup>-06</sup> |
|                   |                |            |                                 |      |        | Yes         | Skeletal Muscle | KRT18P17 |                                |                                | 1.23x10 <sup>-07</sup> |
|                   |                | rs6442331  | 21587                           | 0.61 | 0.86   | Yes         | Skeletal Muscle | CAND2    |                                |                                | 1.25x10 <sup>-11</sup> |
|                   |                |            |                                 |      |        | Yes         | Skeletal Muscle | KRT18P17 |                                |                                | 5.41x10 <sup>-05</sup> |
|                   |                | rs2305397  | 15270                           | 0.6  | 1      | Yes         | Skeletal Muscle | CAND2    |                                |                                | 1.02x10 <sup>-17</sup> |
|                   |                |            |                                 |      |        | Yes         | Thyroid         | CAND2    |                                |                                | 2.74x10 <sup>-05</sup> |
|                   |                |            |                                 |      |        | Yes         | Skeletal Muscle | KRT18P17 |                                |                                | 2.38x10 <sup>-08</sup> |
|                   |                | rs9865624  | 19437                           | 0.6  | 1      | Yes         | Skeletal Muscle | CAND2    |                                |                                | 9.67x10 <sup>-07</sup> |
|                   |                | rs9839769  | 20818                           | 0.6  | 1      | Yes         | Skeletal Muscle | CAND2    |                                |                                | 7.75x10 <sup>-17</sup> |
|                   |                |            |                                 |      |        | Yes         | Thyroid         | CAND2    |                                |                                | 5.97x10 <sup>-05</sup> |
|                   |                |            |                                 |      |        | Yes         | Skeletal Muscle | KRT18P17 |                                |                                | 2.77x10 <sup>-08</sup> |
|                   |                | rs9839768  | 20820                           | 0.6  | 1      | Yes         | Skeletal Muscle | CAND2    |                                |                                | 7.75x10 <sup>-17</sup> |
|                   |                |            |                                 |      |        | Yes         | Thyroid         | CAND2    |                                |                                | 5.97x10 <sup>-05</sup> |
|                   |                |            |                                 |      |        | Yes         | Skeletal Muscle | KRT18P17 |                                |                                | 2.77x10 <sup>-08</sup> |
|                   |                | rs12638595 | 22942                           | 0.6  | 1      | Yes         | Skeletal Muscle | CAND2    |                                |                                | 3.60x10 <sup>-18</sup> |
|                   |                |            |                                 |      |        | Yes         | Thyroid         | CAND2    |                                |                                | 3.92x10 <sup>-06</sup> |
|                   |                |            |                                 |      |        | Yes         | Skeletal Muscle | KRT18P17 |                                |                                | 1.04x10 <sup>-07</sup> |
|                   |                | rs6799544  | 29244                           | 0.59 | 0.78   | Yes         | Skeletal Muscle | CAND2    |                                |                                | 6.69x10 <sup>-06</sup> |
|                   |                |            |                                 |      |        | Yes         | Thyroid         | CAND2    |                                |                                | 3.04x10 <sup>-06</sup> |
|                   |                | rs7641959  | 31468                           | 0.56 | 0.78   | Yes         | Skeletal Muscle | CAND2    |                                |                                | 7.15x10 <sup>-06</sup> |
|                   |                |            |                                 |      |        | Yes         | Thyroid         | CAND2    |                                |                                | 3.60x10 <sup>-06</sup> |
|                   |                | rs4560285  | 33157                           | 0.56 | 0.78   | Yes         | Skeletal Muscle | CAND2    |                                |                                | 1.32x10 <sup>-05</sup> |
|                   |                |            |                                 |      |        | Yes         | Thyroid         | CAND2    |                                |                                | 9.07x10 <sup>-05</sup> |
|                   |                | rs7638333  | 36081                           | 0.56 | 0.78   | Yes         | Skeletal Muscle | CAND2    |                                |                                | 5.15x10 <sup>-06</sup> |
|                   |                |            |                                 |      |        | Yes         | Thyroid         | CAND2    |                                |                                | 6.55x10 <sup>-06</sup> |
|                   |                | rs9831765  | 36289                           | 0.56 | 0.78   | Yes         | Skeletal Muscle | CAND2    |                                |                                | 5.15x10 <sup>-06</sup> |
|                   |                |            |                                 |      |        | Yes         | Thyroid         | CAND2    |                                |                                | 6.55x10 <sup>-06</sup> |
|                   |                | rs9812144  | 36313                           | 0.56 | 0.78   | Yes         | Skeletal Muscle | CAND2    |                                |                                | 5.15x10 <sup>-06</sup> |
|                   |                |            |                                 |      |        | Yes         | Thyroid         | CAND2    |                                |                                | 6.55x10 <sup>-06</sup> |
|                   |                | rs6766744  | 40380                           | 0.56 | 0.78   | Yes         | Skeletal Muscle | CAND2    |                                |                                | 5.16x10 <sup>-06</sup> |
|                   |                |            |                                 |      |        | Yes         | Thyroid         | CAND2    |                                |                                | 1.56x10 <sup>-06</sup> |
|                   |                | rs4535210  | 2606                            | 0.56 | 0.86   | Yes         | Skeletal Muscle | CAND2    |                                |                                | 2.57x10 <sup>-12</sup> |
|                   |                |            |                                 |      |        | Yes         | Skeletal Muscle | KRT18P17 |                                |                                | 3.86x10 <sup>-05</sup> |
|                   |                | rs11719501 | 18020                           | 0.54 | 1      | Yes         | Skeletal Muscle | CAND2    |                                |                                | 7.98x10 <sup>-15</sup> |
|                   |                |            |                                 |      |        | Yes         | Skeletal Muscle | KRT18P17 |                                |                                | 6.14x10 <sup>-05</sup> |
|                   |                | rs34871776 | 26854                           | 0.54 | 1      | Yes         | Skeletal Muscle | CAND2    |                                |                                | 6.11x10 <sup>-12</sup> |
|                   |                |            |                                 |      |        | Yes         | Skeletal Muscle | KRT18P17 |                                |                                | 5.19x10 <sup>-05</sup> |
|                   |                | rs4997708  | 2620                            | 0.54 | 0.85   | No          |                 |          |                                |                                |                        |
|                   |                | rs55692304 | 2166                            | 0.54 | 0.85   | Yes         | Skeletal Muscle | CAND2    |                                |                                | 6.25x10 <sup>-18</sup> |
|                   |                |            |                                 |      |        | Yes         | Thyroid         | CAND2    |                                |                                | 2.47x10 <sup>-05</sup> |
|                   |                |            |                                 |      |        | Yes         | Skeletal Muscle | KRT18P17 |                                |                                | 1.47x10 <sup>-08</sup> |
|                   |                | rs13316229 | 34852                           | 0.53 | 0.78   | Yes         | Skeletal Muscle | CAND2    |                                |                                | 5.15x10 <sup>-06</sup> |
|                   |                |            |                                 |      |        | Yes         | Thyroid         | CAND2    |                                |                                | 6.55x10 <sup>-06</sup> |
|                   |                | rs12629892 | 23303                           | 0.51 | 0.85   | Yes         | Skeletal Muscle | CAND2    |                                |                                | 3.74x10 <sup>-16</sup> |
|                   |                |            |                                 |      |        | Yes         | Thyroid         | CAND2    |                                |                                | 1.36x10 <sup>-05</sup> |
|                   |                |            |                                 |      |        | Yes         | Skeletal Muscle | KRT18P17 |                                |                                | 7.90x10 <sup>-07</sup> |
|                   |                | rs9813960  | 24018                           | 0.51 | 0.85   | Yes         | Skeletal Muscle | CAND2    |                                |                                | 3.74x10 <sup>-15</sup> |
|                   |                |            |                                 |      |        | Yes         | Thyroid         | CAND2    |                                |                                | 1.36x10 <sup>-05</sup> |
|                   |                |            |                                 |      |        | Yes         | Skeletal Muscle | KRT18P17 |                                |                                | 7.90x10 <sup>-07</sup> |
|                   |                | rs9809596  | 1710                            | 0.51 | 0.85   | Yes         | Skeletal Muscle | CAND2    |                                |                                | 5.42x10 <sup>-18</sup> |
|                   |                |            |                                 |      |        | Yes         | Thyroid         | CAND2    |                                |                                | 2.71x10 <sup>-05</sup> |
|                   |                |            |                                 |      |        | Yes         | Skeletal Muscle | KRT18P17 |                                |                                | 1.72x10 <sup>-08</sup> |
| rs4824051         | C              | rs4824051  | 0                               | 1    | 1      | No          |                 |          |                                |                                |                        |
| rs6062468         | C              | rs6062468  | 0                               | 1    | 1      | No          |                 |          |                                |                                |                        |
| rs6540690         | C              | rs6540690  | 0                               | 1    | 1      | No          |                 |          |                                |                                |                        |
| rs6749773         | A              | rs6749773  | 0                               | 1    | 1      | Yes         | Thyroid         | PPP1R21  |                                | increase                       | 3.80x10 <sup>-06</sup> |
| rs6882776         | A              | rs6882776  | 0                               | 1    | 1      | Yes         | Heart, LA       | NKX2-5   | 0.93 (0.90-0.95)               | decrease                       | 8.78x10 <sup>-06</sup> |
| rs6884185         | C              | rs6884185  | 0                               | 1    | 1      | No          |                 |          |                                |                                |                        |
| rs6968408         | C              | rs6968408  | 0                               | 1    | 1      | No          |                 |          |                                |                                |                        |
| rs7160770         | T              | rs7160770  | 0                               | 1    | 1      | No          |                 |          |                                |                                |                        |
| rs7295704         | T              | rs7295704  | 0                               | 1    | 1      | No          |                 |          |                                |                                |                        |
| rs752282          | T              | rs752282   | 0                               | 1    | 1      | No          |                 |          |                                |                                |                        |
| rs7682872         | G              | rs7682872  | 0                               | 1    | 1      | No          |                 |          |                                |                                |                        |

**Supplemental Table 8. eQTL analyses using the Genotype-Tissue Expression Portal (GTEx) and Cleveland Clinic Atrial Tissue Bank.**

**Europeans**

| Sentinel SNP    | AF Risk Allele | Proxy SNP | Distance from Sentinel SNP (bp) | r2 | DPrime | eQTL Yes/No | Tissue    | Gene           | fold change per AF risk allele | Direction of expression change | P value                |
|-----------------|----------------|-----------|---------------------------------|----|--------|-------------|-----------|----------------|--------------------------------|--------------------------------|------------------------|
| rs768347        | T              | rs768347  | 0                               | 1  | 1      | No          |           |                |                                |                                |                        |
| rs7835679       | C              | rs7835679 | 0                               | 1  | 1      | No          |           |                |                                |                                |                        |
| rs7987944       | C              | rs7987944 | 0                               | 1  | 1      | No          |           |                |                                |                                |                        |
| rs9267992       | G              | rs9267992 | 0                               | 1  | 1      | No          |           |                |                                |                                |                        |
| rs9284844       | G              | rs9284844 | 0                               | 1  | 1      | No          |           |                |                                |                                |                        |
| rs9857326       | A              | rs9857326 | 0                               | 1  | 1      | No          |           |                |                                |                                |                        |
| <b>Japanese</b> |                |           |                                 |    |        |             |           |                |                                |                                |                        |
| rs6584555       | C              | rs6584555 | 0                               | 1  | 1      | No          |           |                |                                |                                |                        |
| rs6490029       | A              | rs6490029 | 0                               | 1  | 1      | Yes         | Heart, LA | <i>TMEM116</i> | 1.12 (1.08-1.17)               | increase                       | 4.28x10 <sup>-05</sup> |

**Supplemental Table 9. Nucleotide sequences used for morpholinos and PCR analyses, morpholino efficacy.**

|                                       | Sequence                                                          | Morpholino efficacy (72 hpf) |
|---------------------------------------|-------------------------------------------------------------------|------------------------------|
| <b>Control MO</b>                     | 5'-ATCCTCTTGAGGCGAACAAAGAGTC-3'                                   |                              |
| <b>Anti-<i>neurla</i> E1I1 MO</b>     | 5'-ATTGGAGATCAGTTGCTCACCGTAC-3'                                   | 81.4 ± 6.9%                  |
| <b>Anti-<i>neurla</i> E2I2 MO</b>     | 5'-CCGTCTTTCTTGTTCTTACCTTA-3'                                     | 56.1 ± 1.1%                  |
| <b>Anti-<i>neurla</i> 5'UTR</b>       | 5'-TCCAGAGAGCGATAATCCACACCG-3'                                    | Not measureable              |
| <b>Anti-<i>cand1</i> E3I3 MO</b>      | 5'-AGCAGGAAAGGATGTTTTACCACT-3'                                    | 70.7 ± 16.3%                 |
| <b>Anti-<i>cand1</i> E10I10 MO</b>    | 5'-AGCAGAAATGGACATTAACCTGATA-3'                                   | 70.2 ± 2.4%                  |
| <b>Anti-<i>cand2</i> MO</b>           | 5'-GCGTCTCTAAAATACTTTACCTAA-3'                                    | 98.1 ± 1.2%                  |
| <b>Anti-<i>cux2b</i> E12I12 MO</b>    | 5'-AGGGTTTGTTTCATCACTCACCTCTC-3'                                  | 53.1 ± 20.8%                 |
| <b><i>neurla</i> E1I1 qRT-PCR</b>     | 5'-CTCTGGACCTTTGAGAAATAAACG-3'<br>5'-ACACTGATGCAAGGGCAAAC-3'      |                              |
| <b><i>neurla</i> E2I2 semi-q PCR</b>  | 5'-CTCTGGACCTTTGAGAAATAAACG-3'<br>5'-TCATTTGCAAACCTCTGGTAG-3'     |                              |
| <b><i>cand1</i> E3I3 semi-q PCR</b>   | 5'-AAACACACACACAAGTGGTTTTTC-3'<br>5'-AAGAGGCGAACTACATCATTCTG-3'   |                              |
| <b><i>cand1</i> E10I10 semi-q PCR</b> | 5'-GGAGAAGTCGGTCATCATGTTG-3'<br>5'-TTAACAGCTGTAACCTACCGAGC-3'     |                              |
| <b><i>cand2</i> qRT-PCR</b>           | 5'-AAAAATGACATCCACTGACAAAG-3'<br>5'-ACATAGTCACGACTTTCCTCTCG-3'    |                              |
| <b><i>cux2b</i> E12I12 semi-q PCR</b> | 5'-CATCAGCCAATGGAAGTTCGTC-3'<br>5'-CTGACCCAGTTCCGGAGTTC-3'        |                              |
| <b><i>ef-1α</i> qRT-PCR</b>           | 5'-TTGAGAAGAAAATCGGTGGTGCTG-3'<br>5'-GGAACGGTGTGATTGAGGGAAATTC-3' |                              |
| <b><i>ef-1α</i> semi-q PCR</b>        | 5'-AAGAGAACCATCGAGAAGTTCG-3'<br>5'-CTCAATCTCCATCCCTTGAAC-3'       |                              |
| <b><i>β-actin</i> qRT-PCR</b>         | 5'-CGAGCAGGAGATGGGAACC-3'<br>5'-CAACGGAACGCTCATTGC-3'             |                              |

**Supplemental Table 10. Atrial action potential durations following morpholino microinjection**

| <b>Morpholino</b>          | <b>Average atrial action potential duration (ms)</b> | <b>Standard Deviation</b> | <b>n</b> | <b><i>p</i>-value</b> |
|----------------------------|------------------------------------------------------|---------------------------|----------|-----------------------|
| <b>Control</b>             | 110.1                                                | 8.8                       | 18       | N.A.                  |
| <b><i>neurla</i> E1I1</b>  | 128.9                                                | 14.5                      | 17       | 5.0x10 <sup>-5</sup>  |
| <b><i>neurla</i> E2I2</b>  | 147.0                                                | 15.8                      | 12       | 6.4x10 <sup>-9</sup>  |
| <b><i>neurla</i> 5'UTR</b> | 130.9                                                | 12.3                      | 15       | 3.5x10 <sup>-6</sup>  |
| <b><i>cand1</i> E3I3</b>   | 159.1                                                | 21.5                      | 9        | 8.3x10 <sup>-9</sup>  |
| <b><i>cand1</i> E10I10</b> | 143.7                                                | 11.1                      | 6        | 1.4x10 <sup>-7</sup>  |
| <b><i>cand2</i> E1I1</b>   | 113.3                                                | 10.3                      | 6        | 0.48                  |
| <b><i>cux2b</i> E12I12</b> | 109.1                                                | 13.0                      | 10       | 0.79                  |



**Supplemental Figure 1. Regional plot for the association of *CUX2* with atrial fibrillation in Europeans.** SNPs are plotted using the genomic position (NCBI Build 36) and discovery stage *P* values. The sentinel SNP from the Japanese analysis is labeled in purple. Each dot represents a SNP. The strength of the linkage disequilibrium of SNPs with the sentinel-SNP is indicated by a color gradient according to the legend. Estimated recombination rates are shown by the blue line, and spikes indicate locations of frequent recombination. Below, the chromosomal positions of the SNPs and regional candidate genes are annotated. Linkage disequilibrium and recombination rates are based on the CEU HapMap release 22. Plots prepared using LocusZoom.<sup>15</sup>

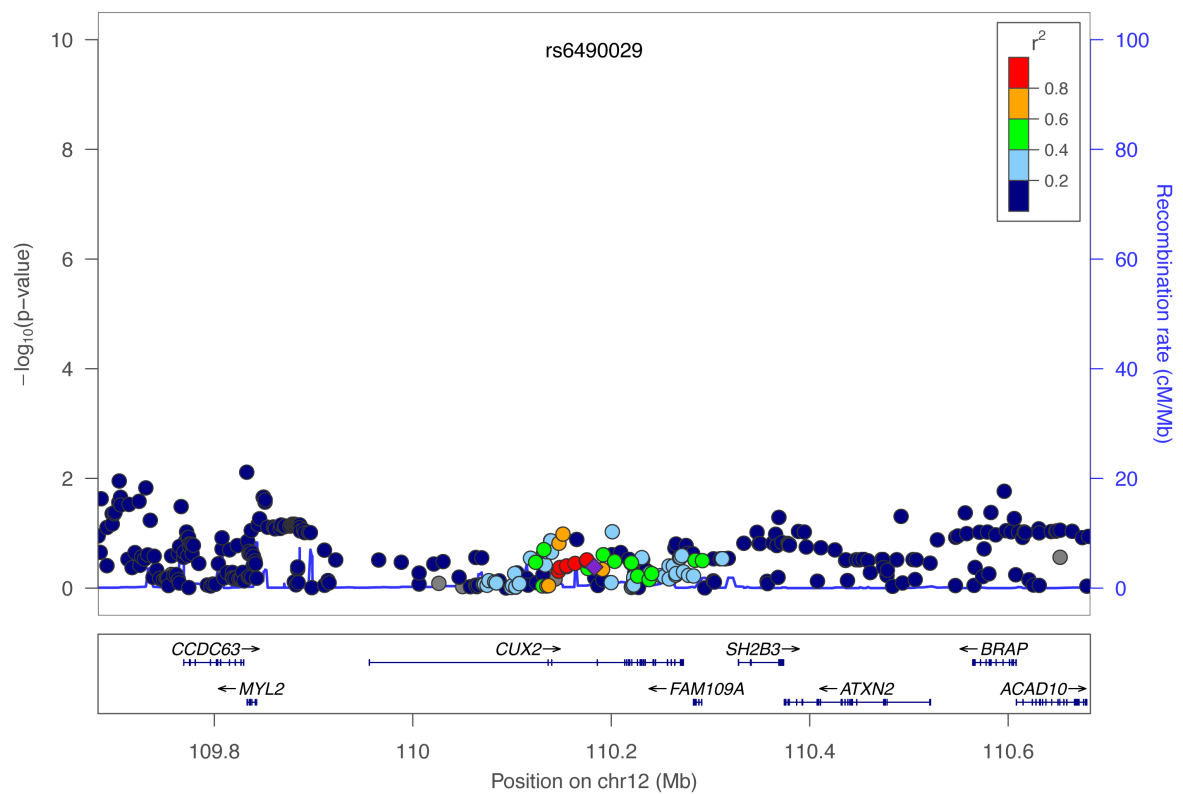

**Supplemental Figure 2. Protein interaction analyses in COS7 cells.** Interactions between NEURL and PITX2 (a), PRRX1 (b), CUX2 (c), or TBX5 (d) in COS7 cells.

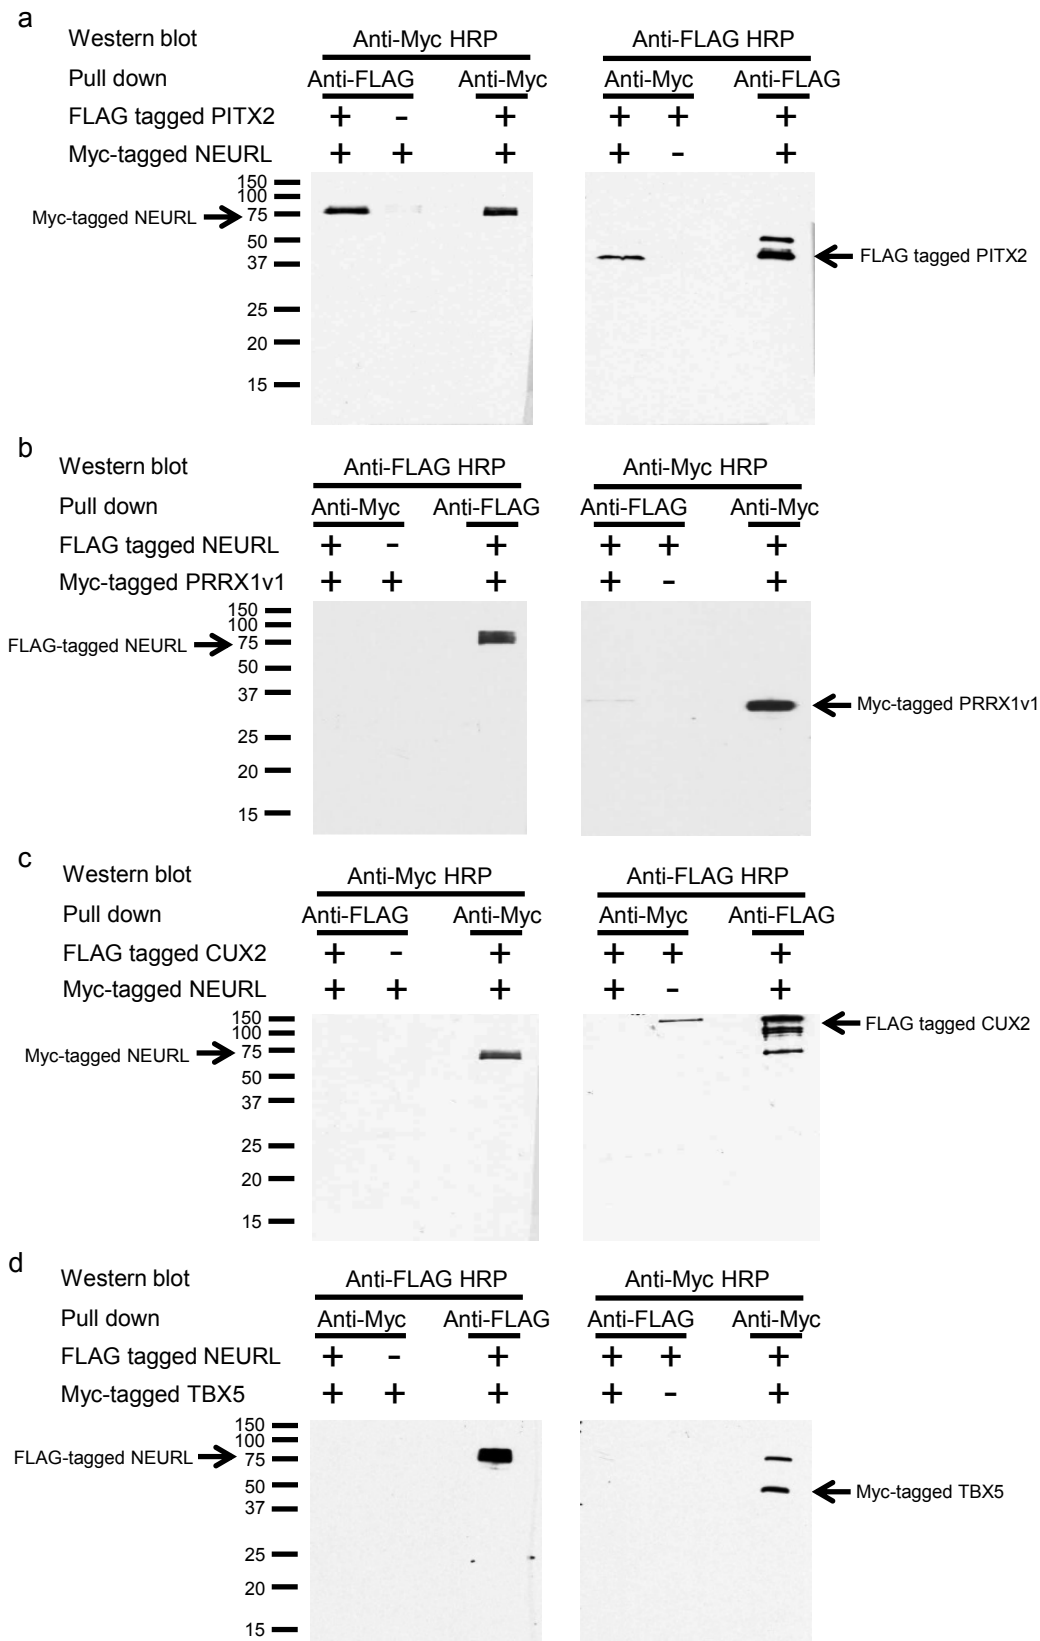

**Supplemental Figure 3. Pathway analysis for 14 atrial fibrillation loci**

The outer circle marks the 5 novel and 9 previously reported susceptibility loci for AF,<sup>1</sup> as well as 6 genes implicated by our eQTL analysis. The inner circle shows the genes encoded at each locus. Connecting lines in the center represent relations between these genes that were reported in the literature. Red lines indicate significant relations between genes ( $p < 0.05$ ).

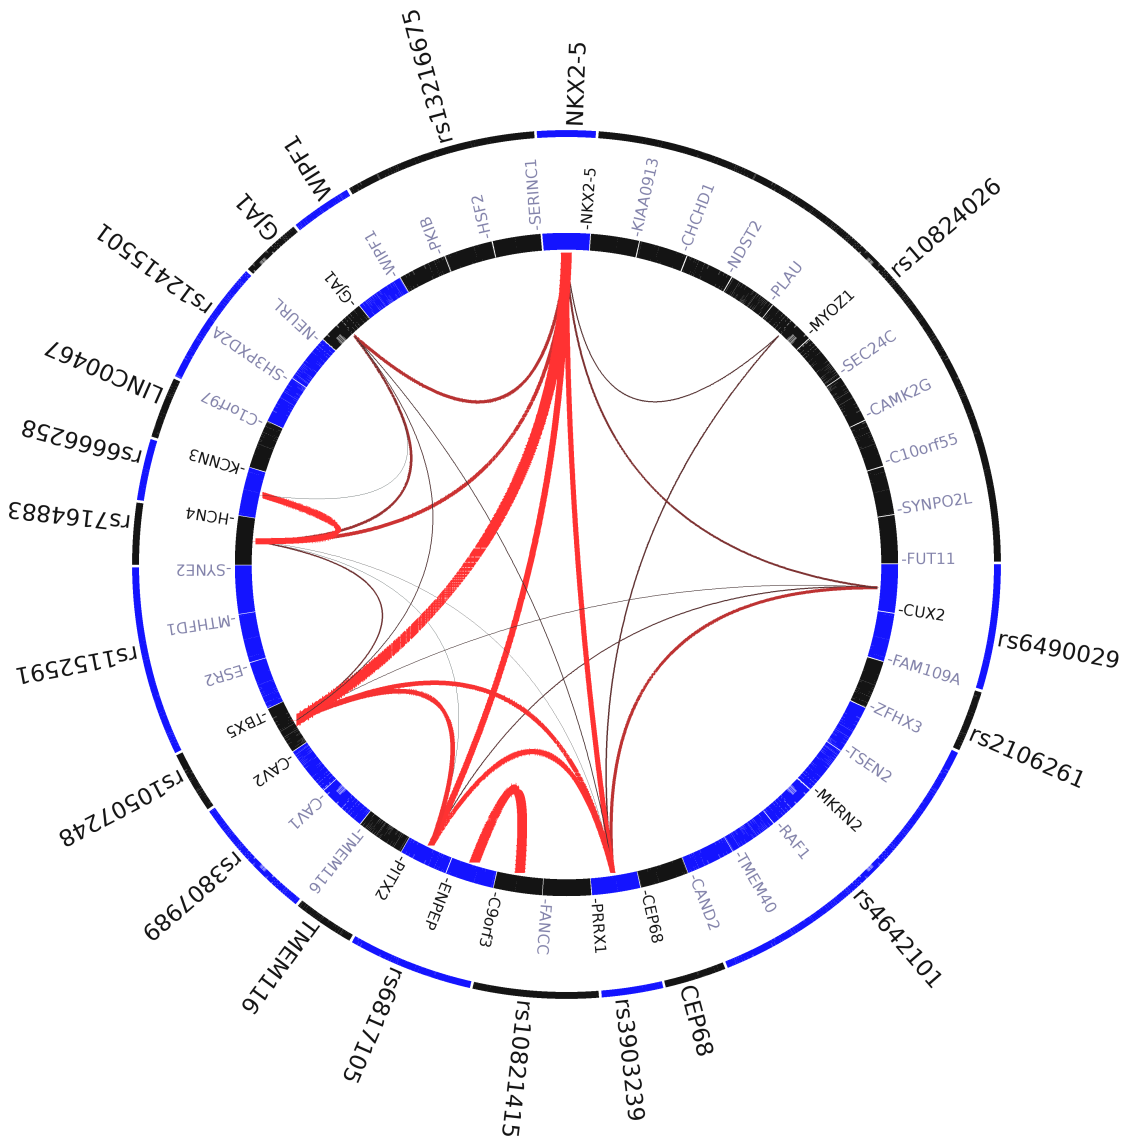

## References

1. Ellinor PT, Lunetta KL, Albert CM, Glazer NL, Ritchie MD, Smith AV, Arking DE, Muller-Nurasyid M, Krijthe BP, Lubitz SA, Bis JC, Chung MK, Dorr M, Ozaki K, Roberts JD, Smith JG, Pfeufer A, Sinner MF, Lohman K, Ding J, Smith NL, Smith JD, Rienstra M, Rice KM, Van Wagoner DR, Magnani JW, Wakili R, Clauss S, Rotter JI, Steinbeck G, Launer LJ, Davies RW, Borkovich M, Harris TB, Lin H, Volker U, Volzke H, Milan DJ, Hofman A, Boerwinkle E, Chen LY, Soliman EZ, Voight BF, Li G, Chakravarti A, Kubo M, Tedrow UB, Rose LM, Ridker PM, Conen D, Tsunoda T, Furukawa T, Sotoodehnia N, Xu S, Kamatani N, Levy D, Nakamura Y, Parvez B, Mahida S, Furie KL, Rosand J, Muhammad R, Psaty BM, Meitinger T, Perz S, Wichmann HE, Witteman JC, Kao WH, Kathiresan S, Roden DM, Uitterlinden AG, Rivadeneira F, McKnight B, Sjogren M, Newman AB, Liu Y, Gollob MH, Melander O, Tanaka T, Stricker BH, Felix SB, Alonso A, Darbar D, Barnard J, Chasman DI, Heckbert SR, Benjamin EJ, Gudnason V, Kaab S. Meta-analysis identifies six new susceptibility loci for atrial fibrillation. *Nat Genet.* 2012;44:670-675
2. Shepherd J, Blauw GJ, Murphy MB, Cobbe SM, Bollen EL, Buckley BM, Ford I, Jukema JW, Hyland M, Gaw A, Lagaay AM, Perry IJ, Macfarlane PW, Meinders AE, Sweeney BJ, Packard CJ, Westendorp RG, Twomey C, Stott DJ. The design of a prospective study of pravastatin in the elderly at risk (prosper). Prosper study group. Prospective study of pravastatin in the elderly at risk. *The American journal of cardiology.* 1999;84:1192-1197
3. Shepherd J, Blauw GJ, Murphy MB, Bollen EL, Buckley BM, Cobbe SM, Ford I, Gaw A, Hyland M, Jukema JW, Kamper AM, Macfarlane PW, Meinders AE, Norrie J, Packard CJ, Perry IJ, Stott DJ, Sweeney BJ, Twomey C, Westendorp RG. Pravastatin in elderly individuals at risk of vascular disease (prosper): A randomised controlled trial. *Lancet.* 2002;360:1623-1630
4. Trompet S, de Craen AJ, Postmus I, Ford I, Sattar N, Caslake M, Stott DJ, Buckley BM, Sacks F, Devlin JJ, Slagboom PE, Westendorp RG, Jukema JW. Replication of ldl gwas hits in prosper/phase as validation for future (pharmaco)genetic analyses. *BMC medical genetics.* 2011;12:131
5. Hofman A, van Duijn CM, Franco OH, Ikram MA, Janssen HL, Klaver CC, Kuipers EJ, Nijsten TE, Stricker BH, Tiemeier H, Uitterlinden AG, Vernooij MW, Witteman JC. The rotterdam study: 2012 objectives and design update. *European journal of epidemiology.* 2011;26:657-686
6. Nabauer M, Gerth A, Limbourg T, Schneider S, Oeff M, Kirchhof P, Goette A, Lewalter T, Ravens U, Meinertz T, Breithardt G, Steinbeck G. The registry of the german competence network on atrial fibrillation: Patient characteristics and initial management. *Europace : European pacing, arrhythmias, and cardiac electrophysiology : journal of the working groups on cardiac pacing, arrhythmias, and cardiac cellular electrophysiology of the European Society of Cardiology.* 2009;11:423-434
7. Henningsen KM, Olesen MS, Ravn LS, Dixen U, Haunsoe S, Bruunsgaard H, Svendsen JH. Inflammatory single nucleotide polymorphisms and the risk of atrial fibrillation: A case control study. *Inflammation research : official journal of the European Histamine Research Society ... [et al.].* 2011;60:209-211
8. Olesen MS, Bentzen BH, Nielsen JB, Steffensen AB, David JP, Jabbari J, Jensen HK, Haunso S, Svendsen JH, Schmitt N. Mutations in the potassium channel subunit *kcne1* are associated with early-onset familial atrial fibrillation. *BMC medical genetics.* 2012;13:24
9. Olesen MS, Holst AG, Jabbari J, Nielsen JB, Christophersen IE, Sajadieh A, Haunso S, Svendsen JH. Genetic loci on chromosomes 4q25, 7p31, and 12p12 are associated with onset of lone atrial fibrillation before the age of 40 years. *The Canadian journal of cardiology.* 2012;28:191-195

10. Heckbert SR, Wiggins KL, Glazer NL, Dublin S, Psaty BM, Smith NL, Longstreth WT, Jr., Lumley T. Antihypertensive treatment with ace inhibitors or beta-blockers and risk of incident atrial fibrillation in a general hypertensive population. *Am J Hypertens*. 2009;22:538-544
11. Smith JG, Platonov PG, Hedblad B, Engstrom G, Melander O. Atrial fibrillation in the malmo diet and cancer study: A study of occurrence, risk factors and diagnostic validity. *European journal of epidemiology*. 2010;25:95-102
12. Lyssenko V, Jonsson A, Almgren P, Pulizzi N, Isomaa B, Tuomi T, Berglund G, Altshuler D, Nilsson P, Groop L. Clinical risk factors, DNA variants, and the development of type 2 diabetes. *The New England journal of medicine*. 2008;359:2220-2232
13. Shin JT, Pomerantsev EV, Mably JD, MacRae CA. High-resolution cardiovascular function confirms functional orthology of myocardial contractility pathways in zebrafish. *Physiological genomics*. 2010;42:300-309
14. Milan DJ, Kim AM, Winterfield JR, Jones IL, Pfeufer A, Sanna S, Arking DE, Amsterdam AH, Sabeh KM, Mably JD, Rosenbaum DS, Peterson RT, Chakravarti A, Kaab S, Roden DM, MacRae CA. Drug-sensitized zebrafish screen identifies multiple genes, including gins3, as regulators of myocardial repolarization. *Circulation*. 2009;120:553-559
15. Pruim RJ, Welch RP, Sanna S, Teslovich TM, Chines PS, Gliedt TP, Boehnke M, Abecasis GR, Willer CJ. Locuszoom: Regional visualization of genome-wide association scan results. *Bioinformatics*. 2010;26:2336-2337
